# Supplementary material
Source: PubMed Central journal article supplement (PMC8978380)
Supplement: 12879_2022_7313_MOESM1_ESM.pdf [file 12879_2022_7313_MOESM1_ESM.pdf]

## Additional file 1

### Contents

|                                                                                                                                                                              |    |
|------------------------------------------------------------------------------------------------------------------------------------------------------------------------------|----|
| Figure S1: Geographical distribution of participants in Shandong province, China.....                                                                                        | 1  |
| Text S1: Description and classification of 39 notifiable infectious diseases in China..                                                                                      | 2  |
| Table S1: Characteristics of infectious diseases in Shandong province, China, from January 2013 to June 2017.....                                                            | 3  |
| Figure S2: Age and sex differences related to the incidence density of the top 50 infectious diseases across different geographical regions (urban vs. rural dimension)..... | 9  |
| Figure S3: Monthly incidence density of 130 infectious diseases, from January 2013 to June 2017 .....                                                                        | 18 |
| Figure S4: Seasonal distribution of 130 infectious diseases in Shandong province, China.....                                                                                 | 29 |
| Figure S5: Seasonal distribution of the five categories of infectious diseases in 16 prefecture-level cities of Shandong province, China .....                               | 51 |
| Figure S6: Annual percentage change in the incidence density of 130 infectious diseases.....                                                                                 | 52 |
| Figure S7: Geographical distribution of 35 notifiable infectious diseases and 95 non-notifiable infectious diseases in Shandong province, China.....                         | 53 |

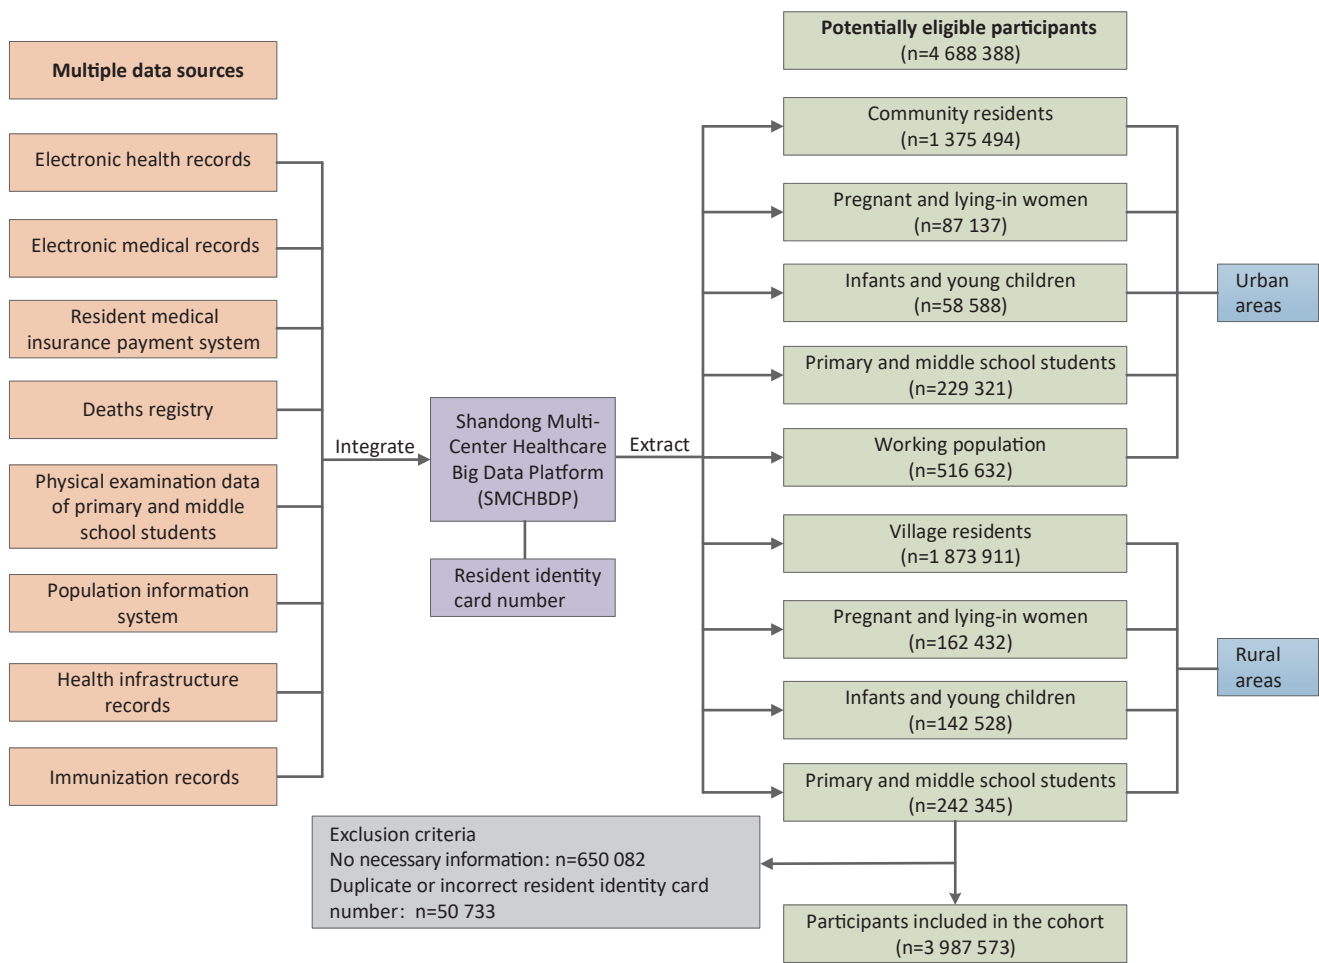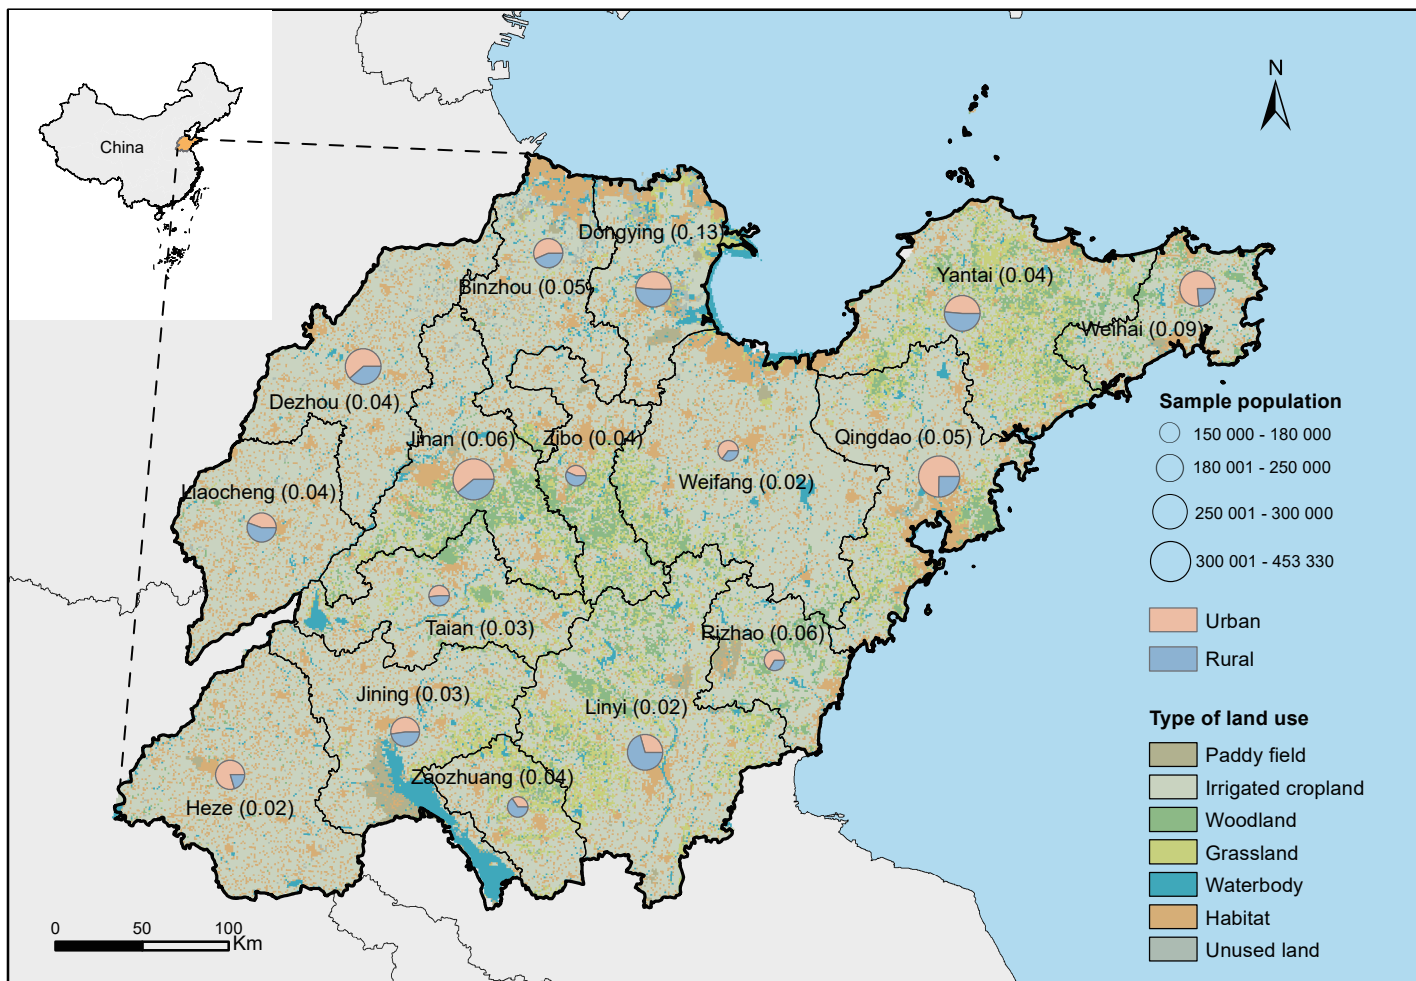

**Figure S1: Geographical distribution of participants in Shandong province, China.** Figures in brackets represent the sample proportion of each city (sample population divided by total population).

### **Text S1: Description and classification of 39 notifiable infectious diseases in China**

The 39 notifiable infectious diseases are divided into the following three classes: class A, which includes plague and cholera; class B, which includes SARS, HIV infection, viral hepatitis, poliomyelitis, avian influenza H5N1, measles, haemorrhagic fever, rabies, epidemic encephalitis B, dengue, anthrax, bacillary and amoebic dysentery, pulmonary tuberculosis, typhoid and paratyphoid, epidemic cerebrospinal meningitis, whooping cough, diphtheria, tetanus neonatorum, scarlet fever, brucellosis, gonorrhoea, syphilis, leptospirosis, schistosomiasis, malaria, avian influenza H7N9; class C, which includes seasonal influenza, mumps, rubella, acute haemorrhagic conjunctivitis, leprosy, typhus fever, visceral leishmaniasis, echinococcosis, filariasis, hand, foot, and mouth disease, Other infectious diarrhoea (infectious diarrhoeal diseases other than cholera, bacterial and amoebic dysentery, typhoid and paratyphoid).

In particular, we divided viral hepatitis into hepatitis A, B, C, D, and E; bacterial and amoebic dysentery into two separate categories of bacterial dysentery and amoebic dysentery; typhoid and paratyphoid into two separate groups of typhoid and paratyphoid; and seasonal influenza into traditional seasonal influenza and influenza A H1N1.

**Table S1**

Characteristics of infectious diseases in Shandong province, China, from January 2013 to June 2017

| Infectious diseases               | Case number (n,% )* |               |               |               |               | Age of onset<br>Median (IQR) | Incidence density (per 100 000 person-years) |        |        |        |        | Incidence density between<br>2013-2017 (per 100 000<br>person-years) |
|-----------------------------------|---------------------|---------------|---------------|---------------|---------------|------------------------------|----------------------------------------------|--------|--------|--------|--------|----------------------------------------------------------------------|
|                                   | Total               | Male          | Female        | Urban         | Rural         |                              | 2013                                         | 2014   | 2015   | 2016   | 2017   |                                                                      |
| <b>Respiratory</b>                | 61951               | 31443 (50.75) | 30508 (49.25) | 37361 (60.31) | 24590 (39.69) | 51 (31-64)                   | 201.00                                       | 227.54 | 495.83 | 538.3  | 572.77 | 405.00                                                               |
| Influenza                         | 44588               | 22093 (49.55) | 22495 (50.45) | 28466 (63.84) | 16122 (36.16) | 54 (40-66)                   | 139.76                                       | 174.83 | 388.05 | 371.43 | 375.51 | 291.49                                                               |
| Pneumonia                         | 10020               | 5081 (50.71)  | 4939 (49.29)  | 4300 (42.91)  | 5720 (57.09)  | 31 (5-61)                    | 15.49                                        | 20.23  | 59.81  | 109.24 | 138.82 | 65.50                                                                |
| Pulmonary tuberculosis            | 3282                | 2110 (64.29)  | 1172 (35.71)  | 2087 (63.59)  | 1195 (36.41)  | 49 (29-64)                   | 16.34                                        | 15.28  | 24.86  | 25.55  | 25.09  | 21.46                                                                |
| Varicella                         | 1153                | 568 (49.26)   | 585 (50.74)   | 804 (69.73)   | 349 (30.27)   | 27 (12-54)                   | 17.05                                        | 2.29   | 5.14   | 5.99   | 9.79   | 7.54                                                                 |
| Scarlet fever                     | 801                 | 484 (60.42)   | 317 (39.58)   | 455 (56.8)    | 346 (43.20)   | 6 (5-7)                      | 1.84                                         | 4.28   | 5.79   | 6.94   | 7.47   | 5.24                                                                 |
| Mumps                             | 623                 | 405 (65.01)   | 218 (34.99)   | 341 (54.74)   | 282 (45.26)   | 10 (7-20)                    | 6.97                                         | 4.18   | 3.77   | 2.81   | 2.68   | 4.07                                                                 |
| Measles                           | 616                 | 283 (45.94)   | 333 (54.06)   | 362 (58.77)   | 254 (41.23)   | 30 (13-42)                   | 2.09                                         | 3.90   | 4.65   | 6.38   | 1.34   | 4.03                                                                 |
| Cryptococcosis                    | 213                 | 96 (45.07)    | 117 (54.93)   | 162 (76.06)   | 51 (23.94)    | 51 (41-61)                   | 0.04                                         | 0.15   | 0.28   | 3.52   | 3.30   | 1.39                                                                 |
| Rubella                           | 149                 | 67 (44.97)    | 82 (55.03)    | 62 (41.61)    | 87 (58.39)    | 26 (0-45)                    | 0.35                                         | 0.56   | 0.88   | 1.48   | 1.75   | 0.97                                                                 |
| Whooping cough                    | 141                 | 67 (47.52)    | 74 (52.48)    | 75 (53.19)    | 66 (46.81)    | 47 (4-66)                    | 0.21                                         | 0.74   | 0.57   | 1.30   | 2.16   | 0.92                                                                 |
| Aspergillosis                     | 113                 | 65 (57.52)    | 48 (42.48)    | 79 (69.91)    | 34 (30.09)    | 65 (57-74)                   | 0.14                                         | 0.50   | 0.57   | 1.09   | 1.65   | 0.74                                                                 |
| Roseola infantum                  | 73                  | 44 (60.27)    | 29 (39.73)    | 37 (50.68)    | 36 (49.32)    | 0 (0-0)                      | 0.35                                         | 0.28   | 0.71   | 0.64   | 0.26   | 0.48                                                                 |
| Influenza A H1N1                  | 45                  | 21 (46.67)    | 24 (53.33)    | 31 (68.89)    | 14 (31.11)    | 39 (24-55)                   | 0.07                                         | 0.06   | 0.23   | 0.58   | 0.57   | 0.29                                                                 |
| Blastomycosis                     | 41                  | 16 (39.02)    | 25 (60.98)    | 33 (80.49)    | 8 (19.51)     | 37 (28-54)                   | 0.11                                         | 0.06   | 0.09   | 0.32   | 1.08   | 0.27                                                                 |
| Meningococcal disease             | 36                  | 22 (61.11)    | 14 (38.89)    | 24 (66.67)    | 12 (33.33)    | 48 (12-71)                   | 0.11                                         | 0.03   | 0.14   | 0.40   | 0.62   | 0.24                                                                 |
| Leprosy                           | 19                  | 10 (52.63)    | 9 (47.37)     | 16 (84.21)    | 3 (15.79)     | 49 (32-62)                   | 0.04                                         | 0      | 0.03   | 0.32   | 0.26   | 0.12                                                                 |
| Streptococcal pharyngitis         | 13                  | 1 (7.69)      | 12 (92.31)    | 10 (76.92)    | 3 (23.08)     | 44 (35-54)                   | 0.04                                         | 0.06   | 0.09   | 0.13   | 0.10   | 0.08                                                                 |
| Legionellosis                     | 9                   | 3 (33.33)     | 6 (66.67)     | 7 (77.78)     | 2 (22.22)     | 5 (3-38)                     | 0                                            | 0      | 0.03   | 0.13   | 0.15   | 0.06                                                                 |
| Epidemic cerebrospinal meningitis | 5                   | 4 (80.00)     | 1 (20.00)     | 3 (60.00)     | 2 (40.00)     | 8 (6-9)                      | 0                                            | 0.03   | 0.06   | 0.03   | 0.05   | 0.03                                                                 |

|                                                      |      |              |              |              |              |            |       |       |       |       |        |       |
|------------------------------------------------------|------|--------------|--------------|--------------|--------------|------------|-------|-------|-------|-------|--------|-------|
| Nocardiosis                                          | 4    | 1 (25.00)    | 3 (75.00)    | 1 (25.00)    | 3 (75.00)    | 60 (50-68) | 0     | 0.03  | 0.06  | 0     | 0.05   | 0.03  |
| Histoplasmosis                                       | 3    | 1 (33.33)    | 2 (66.67)    | 3 (100.00)   | 0 (0.00)     | 34 (31-39) | 0     | 0.03  | 0     | 0.05  | 0      | 0.02  |
| Erythema infectiosum                                 | 2    | 1 (50.00)    | 1 (50.00)    | 2 (100.00)   | 0 (0.00)     | 53 (49-56) | 0     | 0     | 0.03  | 0     | 0.05   | 0.01  |
| Coccidioidomycosis                                   | 2    | 0 (0.00)     | 2 (100.00)   | 1 (50.00)    | 1 (50.00)    | 51 (47-54) | 0     | 0     | 0.03  | 0     | 0.05   | 0.01  |
| <b>Gastrointestinal</b>                              | 9862 | 4437 (44.99) | 5425 (55.01) | 5135 (52.07) | 4727 (47.93) | 50 (33-63) | 42.48 | 16.24 | 49.96 | 94.62 | 144.33 | 64.47 |
| Typhoid                                              | 5466 | 2500 (45.74) | 2966 (54.26) | 2630 (48.12) | 2836 (51.88) | 57 (45-66) | 27.59 | 6.20  | 22.36 | 48.78 | 95.56  | 35.73 |
| Other infectious diarrhoea†                          | 899  | 389 (43.27)  | 510 (56.73)  | 641 (71.3)   | 258 (28.7)   | 31 (3-53)  | 1.49  | 3.32  | 4.34  | 10.14 | 11.02  | 5.88  |
| Ascariasis                                           | 833  | 370 (44.42)  | 463 (55.58)  | 166 (19.93)  | 667 (80.07)  | 33 (10-50) | 2.79  | 0.43  | 9.67  | 8.05  | 4.89   | 5.45  |
| Bacterial dysentery                                  | 625  | 285 (45.60)  | 340 (54.40)  | 469 (75.04)  | 156 (24.96)  | 46 (23-60) | 7.25  | 3.78  | 3.57  | 3.02  | 2.99   | 4.09  |
| Paratyphoid                                          | 610  | 225 (36.89)  | 385 (63.11)  | 531 (87.05)  | 79 (12.95)   | 41 (32-54) | 0.21  | 0.12  | 0.31  | 9.11  | 12.61  | 3.99  |
| Amoebic dysentery                                    | 322  | 146 (45.34)  | 176 (54.66)  | 115 (35.71)  | 207 (64.29)  | 49 (35-60) | 0.32  | 0.65  | 2.7   | 3.97  | 2.42   | 2.11  |
| Gastroenteritis due to Rotavirus                     | 216  | 106 (49.07)  | 110 (50.93)  | 111 (51.39)  | 105 (48.61)  | 1 (1-3)    | 0.88  | 0.22  | 0.77  | 1.46  | 5.25   | 1.41  |
| Intestinal infections due to <i>Escherichia coli</i> | 206  | 103 (50.00)  | 103 (50.00)  | 21 (10.19)   | 185 (89.81)  | 48 (17-61) | 0     | 0     | 1.87  | 3.02  | 1.34   | 1.35  |
| Oesophagostomiasis                                   | 156  | 51 (32.69)   | 105 (67.31)  | 144 (92.31)  | 12 (7.69)    | 50 (42-58) | 0     | 0     | 0.11  | 2.49  | 2.99   | 1.02  |
| Hepatitis A                                          | 102  | 41 (40.20)   | 61 (59.80)   | 70 (68.63)   | 32 (31.37)   | 42 (29-58) | 0.39  | 0.25  | 0.96  | 0.85  | 0.88   | 0.67  |
| Enterobiasis                                         | 82   | 46 (56.10)   | 36 (43.90)   | 19 (23.17)   | 63 (76.83)   | 18 (10-43) | 0.18  | 0     | 0.91  | 0.85  | 0.67   | 0.54  |
| Hepatitis E                                          | 78   | 52 (66.67)   | 26 (33.33)   | 53 (67.95)   | 25 (32.05)   | 58 (43-65) | 0.53  | 0.65  | 0.6   | 0.29  | 0.51   | 0.51  |
| Bacterial foodborne intoxications, unspecified       | 54   | 28 (51.85)   | 26 (48.15)   | 40 (74.07)   | 14 (25.93)   | 41 (33-55) | 0.21  | 0.15  | 0.23  | 0.69  | 0.46   | 0.35  |
| Enteritis due to Norovirus                           | 42   | 20 (47.62)   | 22 (52.38)   | 17 (40.48)   | 25 (59.52)   | 49 (28-58) | 0.11  | 0.03  | 0.77  | 0.21  | 0.15   | 0.27  |
| Cysticercosis                                        | 42   | 19 (45.24)   | 23 (54.76)   | 34 (80.95)   | 8 (19.05)    | 55 (38-66) | 0.11  | 0.15  | 0.17  | 0.48  | 0.51   | 0.27  |
| Infections due to other <i>Salmonella</i>            | 33   | 20 (60.61)   | 13 (39.39)   | 17 (51.52)   | 16 (48.48)   | 44 (27-64) | 0     | 0.09  | 0.03  | 0.29  | 0.93   | 0.22  |
| Taeniasis                                            | 14   | 5 (35.71)    | 9 (64.29)    | 9 (64.29)    | 5 (35.71)    | 39 (14-57) | 0     | 0.03  | 0.09  | 0.13  | 0.26   | 0.09  |
| Campylobacteriosis                                   | 10   | 4 (40.00)    | 6 (60.00)    | 4 (40.00)    | 6 (60.00)    | 52 (47-61) | 0.04  | 0.03  | 0.06  | 0.03  | 0.26   | 0.07  |
| Toxoplasmosis                                        | 9    | 3 (33.33)    | 6 (66.67)    | 4 (44.44)    | 5 (55.56)    | 40 (39-46) | 0.07  | 0     | 0.06  | 0.11  | 0.05   | 0.06  |
| Clonorchiasis                                        | 9    | 2 (22.22)    | 7 (77.78)    | 7 (77.78)    | 2 (22.22)    | 48 (44-61) | 0.07  | 0     | 0     | 0.03  | 0.31   | 0.06  |
| Botulism                                             | 9    | 2 (22.22)    | 7 (77.78)    | 6 (66.67)    | 3 (33.33)    | 32 (30-53) | 0     | 0.03  | 0.06  | 0.11  | 0.10   | 0.06  |

|                                                      |             |                    |                    |                    |                    |                   |             |             |             |              |             |             |
|------------------------------------------------------|-------------|--------------------|--------------------|--------------------|--------------------|-------------------|-------------|-------------|-------------|--------------|-------------|-------------|
| Paragonimiasis                                       | 7           | 3 (42.86)          | 4 (57.14)          | 2 (28.57)          | 5 (71.43)          | 57 (52-66)        | 0           | 0           | 0           | 0.19         | 0           | 0.05        |
| Trichuriasis                                         | 6           | 2 (33.33)          | 4 (66.67)          | 5 (83.33)          | 1 (16.67)          | 44 (39-48)        | 0.04        | 0           | 0           | 0.11         | 0.05        | 0.04        |
| Cryptosporidiosis                                    | 5           | 4 (80.00)          | 1 (20.00)          | 4 (80.00)          | 1 (20.00)          | 45 (40-47)        | 0           | 0           | 0.03        | 0.08         | 0.05        | 0.03        |
| Capillariasis                                        | 4           | 2 (50.00)          | 2 (50.00)          | 0 (0.00)           | 4 (100.00)         | 30 (15-47)        | 0           | 0           | 0.11        | 0            | 0           | 0.03        |
| Enteritis due to Adenovirus                          | 4           | 3 (75.00)          | 1 (25.00)          | 2 (50.00)          | 2 (50.00)          | 1 (0-17)          | 0.04        | 0.03        | 0.03        | 0.03         | 0           | 0.03        |
| Listeriosis                                          | 3           | 0 (0.00)           | 3 (100.00)         | 3 (100.00)         | 0 (0.00)           | 48 (39-57)        | 0           | 0           | 0           | 0.05         | 0.05        | 0.02        |
| Epidemic myalgia                                     | 3           | 1 (33.33)          | 2 (66.67)          | 1 (33.33)          | 2 (66.67)          | 68 (37-71)        | 0           | 0           | 0.03        | 0.05         | 0           | 0.02        |
| Foodborne Bacillus cereus intoxication               | 2           | 1 (50.00)          | 1 (50.00)          | 2 (100.00)         | 0 (0.00)           | 69 (69-69)        | 0           | 0.03        | 0.03        | 0            | 0           | 0.01        |
| Intestinal infections due to Yersinia enterocolitica | 2           | 0 (0.00)           | 2 (100.00)         | 2 (100.00)         | 0 (0.00)           | 69 (65-73)        | 0           | 0           | 0.06        | 0            | 0           | 0.01        |
| Foodborne Clostridium perfringens intoxication       | 2           | 0 (0.00)           | 2 (100.00)         | 2 (100.00)         | 0 (0.00)           | 43 (38-47)        | 0.07        | 0           | 0           | 0            | 0           | 0.01        |
| Giardiasis                                           | 2           | 1 (50.00)          | 1 (50.00)          | 2 (100.00)         | 0 (0.00)           | 48 (40-55)        | 0.04        | 0           | 0.03        | 0            | 0           | 0.01        |
| Foodborne staphylococcal intoxication                | 1           | 1 (100.00)         | 0 (0.00)           | 1 (100.00)         | 0 (0.00)           | 78 (78-78)        | 0           | 0.03        | 0           | 0            | 0           | 0.01        |
| Dipylidiasis                                         | 1           | 0 (0.00)           | 1 (100.00)         | 0 (0.00)           | 1 (100.00)         | 56 (56-56)        | 0           | 0           | 0.03        | 0            | 0           | 0.01        |
| Cystoisosporiasis                                    | 1           | 0 (0.00)           | 1 (100.00)         | 0 (0.00)           | 1 (100.00)         | 50 (50-50)        | 0.04        | 0           | 0           | 0            | 0           | 0.01        |
| Fascioliasis                                         | 1           | 1 (100.00)         | 0 (0.00)           | 1 (100.00)         | 0 (0.00)           | 46 (46-46)        | 0.04        | 0           | 0           | 0            | 0           | 0.01        |
| Syngamosis                                           | 1           | 1 (100.00)         | 0 (0.00)           | 0 (0.00)           | 1 (100.00)         | 31 (31-31)        | 0           | 0           | 0           | 0.03         | 0           | 0.01        |
| <b>Vector-borne</b>                                  | <b>1128</b> | <b>613 (54.34)</b> | <b>515 (45.66)</b> | <b>780 (69.15)</b> | <b>348 (30.85)</b> | <b>44 (31-54)</b> | <b>2.33</b> | <b>3.04</b> | <b>5.59</b> | <b>12.39</b> | <b>15.4</b> | <b>7.37</b> |
| Brucellosis                                          | 640         | 348 (54.38)        | 292 (45.62)        | 497 (77.66)        | 143 (22.34)        | 42 (30-50)        | 0.39        | 0.90        | 1.48        | 8.32         | 12.05       | 4.18        |
| Hemorrhagic fever                                    | 151         | 103 (68.21)        | 48 (31.79)         | 68 (45.03)         | 83 (54.97)         | 49 (43-61)        | 0.92        | 0.84        | 1.13        | 1.19         | 0.67        | 0.99        |
| Typhus fever                                         | 49          | 20 (40.82)         | 29 (59.18)         | 31 (63.27)         | 18 (36.73)         | 56 (48-63)        | 0.18        | 0.28        | 0.40        | 0.40         | 0.31        | 0.32        |
| Orf                                                  | 47          | 24 (51.06)         | 23 (48.94)         | 33 (70.21)         | 14 (29.79)         | 15 (8-24)         | 0.21        | 0.37        | 0.34        | 0.32         | 0.26        | 0.31        |
| Erysipeloid                                          | 45          | 26 (57.78)         | 19 (42.22)         | 33 (73.33)         | 12 (26.67)         | 55 (38-64)        | 0.18        | 0.15        | 0.43        | 0.45         | 0.15        | 0.29        |
| Severe fever with thrombocytopenia syndrome          | 44          | 22 (50.00)         | 22 (50.00)         | 23 (52.27)         | 21 (47.73)         | 63 (53-69)        | 0.07        | 0.06        | 0.68        | 0.34         | 0.15        | 0.29        |
| Malaria                                              | 37          | 32 (86.49)         | 5 (13.51)          | 26 (70.27)         | 11 (29.73)         | 41 (31-47)        | 0.07        | 0.19        | 0.28        | 0.34         | 0.31        | 0.24        |
| Spotted fever                                        | 23          | 6 (26.09)          | 17 (73.91)         | 18 (78.26)         | 5 (21.74)          | 42 (31-53)        | 0           | 0           | 0.31        | 0.13         | 0.36        | 0.15        |
| Tularemia                                            | 20          | 6 (30.00)          | 14 (70.00)         | 11 (55.00)         | 9 (45.00)          | 57 (48-64)        | 0.04        | 0.06        | 0.14        | 0.11         | 0.41        | 0.13        |

|                                        |       |              |              |              |              |            |       |       |       |       |        |       |
|----------------------------------------|-------|--------------|--------------|--------------|--------------|------------|-------|-------|-------|-------|--------|-------|
| Leptospirosis                          | 10    | 3 (30.00)    | 7 (70.00)    | 5 (50.00)    | 5 (50.00)    | 28 (27-29) | 0     | 0     | 0.03  | 0.11  | 0.26   | 0.07  |
| Epidemic encephalitis B                | 10    | 4 (40.00)    | 6 (60.00)    | 9 (90.00)    | 1 (10.00)    | 52 (38-61) | 0.18  | 0.03  | 0     | 0.11  | 0      | 0.07  |
| Extraintestinal yersiniosis            | 9     | 4 (44.44)    | 5 (55.56)    | 7 (77.78)    | 2 (22.22)    | 60 (31-62) | 0.04  | 0.06  | 0     | 0.13  | 0.05   | 0.06  |
| Glanders                               | 9     | 5 (55.56)    | 4 (44.44)    | 2 (22.22)    | 7 (77.78)    | 41 (37-59) | 0     | 0     | 0.14  | 0.08  | 0.05   | 0.06  |
| Cat-scratch disease                    | 5     | 1 (20.00)    | 4 (80.00)    | 1 (20.00)    | 4 (80.00)    | 44 (11-53) | 0     | 0     | 0.06  | 0.08  | 0      | 0.03  |
| Relapsing fever                        | 4     | 1 (25.00)    | 3 (75.00)    | 3 (75.00)    | 1 (25.00)    | 62 (47-74) | 0.04  | 0.03  | 0     | 0     | 0.10   | 0.03  |
| Monkeypox                              | 4     | 2 (50.00)    | 2 (50.00)    | 3 (75.00)    | 1 (25.00)    | 46 (39-55) | 0     | 0     | 0     | 0.05  | 0.10   | 0.03  |
| Q fever                                | 4     | 0 (0.00)     | 4 (100.00)   | 2 (50.00)    | 2 (50.00)    | 40 (19-67) | 0     | 0     | 0.06  | 0.03  | 0.05   | 0.03  |
| Yellow fever                           | 3     | 1 (33.33)    | 2 (66.67)    | 0 (0.00)     | 3 (100.00)   | 69 (56-71) | 0     | 0     | 0     | 0.08  | 0      | 0.02  |
| Eastern equine encephalitis            | 2     | 0 (0.00)     | 2 (100.00)   | 0 (0.00)     | 2 (100.00)   | 69 (69-70) | 0     | 0     | 0.03  | 0     | 0.05   | 0.01  |
| Melioidosis                            | 2     | 0 (0.00)     | 2 (100.00)   | 1 (50.00)    | 1 (50.00)    | 75 (71-78) | 0     | 0     | 0.06  | 0     | 0      | 0.01  |
| African trypanosomiasis                | 2     | 1 (50.00)    | 1 (50.00)    | 1 (50.00)    | 1 (50.00)    | 67 (61-74) | 0     | 0.03  | 0     | 0     | 0.05   | 0.01  |
| Visceral leishmaniasis                 | 2     | 2 (100.00)   | 0 (0.00)     | 1 (50.00)    | 1 (50.00)    | 29 (28-30) | 0     | 0     | 0     | 0.05  | 0      | 0.01  |
| Dengue                                 | 2     | 1 (50.00)    | 1 (50.00)    | 1 (50.00)    | 1 (50.00)    | 21 (16-26) | 0     | 0.03  | 0     | 0.03  | 0      | 0.01  |
| Bartonellosis                          | 1     | 0 (0.00)     | 1 (100.00)   | 1 (100.00)   | 0 (0.00)     | 53 (53-53) | 0     | 0     | 0     | 0.03  | 0      | 0.01  |
| Crimean-Congo haemorrhagic fever       | 1     | 0 (0.00)     | 1 (100.00)   | 1 (100.00)   | 0 (0.00)     | 41 (41-41) | 0     | 0     | 0.03  | 0     | 0      | 0.01  |
| Rickettsialpox                         | 1     | 0 (0.00)     | 1 (100.00)   | 1 (100.00)   | 0 (0.00)     | 35 (35-35) | 0     | 0     | 0     | 0.03  | 0      | 0.01  |
| Lyme borreliosis                       | 1     | 1 (100.00)   | 0 (0.00)     | 1 (100.00)   | 0 (0.00)     | 28 (28-28) | 0.04  | 0     | 0     | 0     | 0      | 0.01  |
| <b>Blood- and sexually transmitted</b> | 10170 | 5285 (51.97) | 4885 (48.03) | 6971 (68.54) | 3199 (31.46) | 43 (31-55) | 46.2  | 46.17 | 63.67 | 76.59 | 115.23 | 66.48 |
| Hepatitis B                            | 6576  | 4091 (62.21) | 2485 (37.79) | 4487 (68.23) | 2089 (31.77) | 46 (35-57) | 38.00 | 36.77 | 48.28 | 45.08 | 47.23  | 43.03 |
| Syphilis                               | 1667  | 254 (15.24)  | 1413 (84.76) | 1269 (76.12) | 398 (23.88)  | 31 (27-38) | 1.17  | 2.01  | 3.12  | 14.88 | 46.19  | 10.9  |
| Hepatitis C                            | 517   | 337 (65.18)  | 180 (34.82)  | 403 (77.95)  | 114 (22.05)  | 50 (38-60) | 3.96  | 3.13  | 3.55  | 3.39  | 2.63   | 3.38  |
| Gonorrhoea                             | 433   | 263 (60.74)  | 170 (39.26)  | 222 (51.27)  | 211 (48.73)  | 43 (28-58) | 0.6   | 0.43  | 3.01  | 4.95  | 5.61   | 2.83  |
| Trichomoniasis                         | 394   | 9 (2.28)     | 385 (97.72)  | 251 (63.71)  | 143 (36.29)  | 36 (28-45) | 1.49  | 1.55  | 2.50  | 3.20  | 4.79   | 2.58  |
| Anogenital warts                       | 234   | 103 (44.02)  | 131 (55.98)  | 146 (62.39)  | 88 (37.61)   | 30 (25-45) | 0.25  | 0.71  | 1.16  | 2.70  | 3.14   | 1.53  |
| Cytomegaloviral disease                | 183   | 100 (54.64)  | 83 (45.36)   | 80 (43.72)   | 103 (56.28)  | 2 (0-32)   | 0.25  | 1.08  | 1.25  | 1.40  | 2.27   | 1.20  |

|                                             |              |                      |                      |                      |                     |                   |             |               |               |               |               |               |
|---------------------------------------------|--------------|----------------------|----------------------|----------------------|---------------------|-------------------|-------------|---------------|---------------|---------------|---------------|---------------|
| HIV infection                               | 89           | 75 (84.27)           | 14 (15.73)           | 64 (71.91)           | 25 (28.09)          | 35 (28-48)        | 0.25        | 0.12          | 0.28          | 0.34          | 2.83          | 0.58          |
| Anogenital herpes simplex infection         | 53           | 37 (69.81)           | 16 (30.19)           | 34 (64.15)           | 19 (35.85)          | 51 (38-54)        | 0.14        | 0.31          | 0.45          | 0.48          | 0.26          | 0.35          |
| Granuloma inguinale                         | 12           | 8 (66.67)            | 4 (33.33)            | 4 (33.33)            | 8 (66.67)           | 49 (41-53)        | 0           | 0.03          | 0.06          | 0.13          | 0.21          | 0.08          |
| Hepatitis D                                 | 9            | 7 (77.78)            | 2 (22.22)            | 9 (100.00)           | 0 (0.00)            | 61 (45-62)        | 0.04        | 0.03          | 0.06          | 0.05          | 0.15          | 0.06          |
| Chancroid                                   | 2            | 1 (50.00)            | 1 (50.00)            | 2 (100.00)           | 0 (0.00)            | 48 (44-51)        | 0.07        | 0             | 0             | 0             | 0             | 0.01          |
| Warts of lips or oral cavity                | 1            | 0 (0.00)             | 1 (100.00)           | 0 (0.00)             | 1 (100.00)          | 4 (4-4)           | 0           | 0             | 0             | 0.03          | 0             | 0.01          |
| <b>Mucocutaneous</b>                        | <b>23178</b> | <b>11435 (49.34)</b> | <b>11743 (50.66)</b> | <b>15500 (66.87)</b> | <b>7678 (33.13)</b> | <b>44 (14-62)</b> | <b>72.8</b> | <b>104.06</b> | <b>156.13</b> | <b>209.43</b> | <b>224.03</b> | <b>151.52</b> |
| Zoster                                      | 10636        | 4902 (46.09)         | 5734 (53.91)         | 7437 (69.92)         | 3199 (30.08)        | 58 (44-68)        | 28.76       | 36.91         | 73.71         | 100.29        | 115.7         | 69.53         |
| Hand, foot, and mouth disease               | 5188         | 3158 (60.87)         | 2030 (39.13)         | 2466 (47.53)         | 2722 (52.47)        | 2 (1-4)           | 19.14       | 43.66         | 39.13         | 39.06         | 19.77         | 33.92         |
| Viral conjunctivitis                        | 1914         | 813 (42.48)          | 1101 (57.52)         | 1739 (90.86)         | 175 (9.14)          | 56 (42-65)        | 7.64        | 6.82          | 12.94         | 17.27         | 19.05         | 12.51         |
| Trachoma                                    | 1176         | 478 (40.65)          | 698 (59.35)          | 934 (79.42)          | 242 (20.58)         | 57 (43-68)        | 9.98        | 6.20          | 7.18          | 6.99          | 9.11          | 7.69          |
| Common warts                                | 1156         | 645 (55.8)           | 511 (44.20)          | 805 (69.64)          | 351 (30.36)         | 34 (27-47)        | 0.71        | 1.98          | 5.42          | 13.27         | 19.57         | 7.56          |
| Herpes simplex infections                   | 718          | 326 (45.40)          | 392 (54.60)          | 521 (72.56)          | 197 (27.44)         | 43 (29-59)        | 2.12        | 2.39          | 3.97          | 7.04          | 9.01          | 4.69          |
| Plane warts                                 | 487          | 187 (38.40)          | 300 (61.60)          | 321 (65.91)          | 166 (34.09)         | 32 (27-41)        | 0.71        | 0.84          | 2.67          | 5.27          | 7.57          | 3.18          |
| Impetigo                                    | 479          | 204 (42.59)          | 275 (57.41)          | 288 (60.13)          | 191 (39.87)         | 33 (10-52)        | 1.27        | 1.49          | 2.58          | 5.35          | 5.25          | 3.13          |
| Non-dermatophyte superficial dermatomycoses | 339          | 170 (50.15)          | 169 (49.85)          | 244 (71.98)          | 95 (28.02)          | 33 (26-46)        | 0.50        | 0.74          | 1.84          | 4.24          | 3.91          | 2.22          |
| Molluscum contagiosum                       | 274          | 101 (36.86)          | 173 (63.14)          | 194 (70.8)           | 80 (29.20)          | 29 (25-37)        | 0.35        | 0.31          | 0.94          | 2.86          | 5.82          | 1.79          |
| Infectious mononucleosis                    | 243          | 129 (53.09)          | 114 (46.91)          | 181 (74.49)          | 62 (25.51)          | 6 (3-24)          | 0.81        | 1.92          | 1.79          | 1.69          | 1.60          | 1.59          |
| Scabies                                     | 167          | 107 (64.07)          | 60 (35.93)           | 99 (59.28)           | 68 (40.72)          | 28 (21-45)        | 0.11        | 0.31          | 1.13          | 1.46          | 3.04          | 1.09          |
| PIPSM                                       | 155          | 92 (59.35)           | 63 (40.65)           | 84 (54.19)           | 71 (45.81)          | 2 (1-3)           | 0.25        | 0.12          | 1.05          | 2.12          | 1.39          | 1.01          |
| Myiasis                                     | 72           | 43 (59.72)           | 29 (40.28)           | 66 (91.67)           | 6 (8.33)            | 38 (26-54)        | 0.04        | 0.03          | 0.51          | 0.82          | 1.08          | 0.47          |
| Tetanus                                     | 35           | 13 (37.14)           | 22 (62.86)           | 25 (71.43)           | 10 (28.57)          | 45 (27-53)        | 0.18        | 0.15          | 0.17          | 0.45          | 0.10          | 0.23          |
| Rabies                                      | 29           | 19 (65.52)           | 10 (34.48)           | 11 (37.93)           | 18 (62.07)          | 29 (7-46)         | 0           | 0             | 0.60          | 0.11          | 0.21          | 0.19          |
| Yaws                                        | 29           | 13 (44.83)           | 16 (55.17)           | 24 (82.76)           | 5 (17.24)           | 50 (31-62)        | 0           | 0             | 0.06          | 0.21          | 0.98          | 0.19          |
| Acute hemorrhagic conjunctivitis            | 13           | 8 (61.54)            | 5 (38.46)            | 11 (84.62)           | 2 (15.38)           | 40 (34-50)        | 0.11        | 0             | 0.09          | 0.05          | 0.26          | 0.08          |
| Eumycetoma                                  | 11           | 4 (36.36)            | 7 (63.64)            | 11 (100.00)          | 0 (0.00)            | 49 (42-75)        | 0.11        | 0             | 0.06          | 0.13          | 0.05          | 0.07          |



|                                  |    |           |            |            |            |            |      |      |      |      |      |      |
|----------------------------------|----|-----------|------------|------------|------------|------------|------|------|------|------|------|------|
| Infestation by mites             | 11 | 5 (45.45) | 6 (54.55)  | 7 (63.64)  | 4 (36.36)  | 40 (24-61) | 0.04 | 0.03 | 0.06 | 0.11 | 0.15 | 0.07 |
| Infantile papular acrodermatitis | 9  | 5 (55.56) | 4 (44.44)  | 5 (55.56)  | 4 (44.44)  | 3 (2-12)   | 0    | 0    | 0.09 | 0.11 | 0.1  | 0.06 |
| Echinococcosis                   | 8  | 4 (50.00) | 4 (50.00)  | 6 (75.00)  | 2 (25.00)  | 58 (42-61) | 0    | 0.03 | 0.06 | 0.11 | 0.05 | 0.05 |
| Sporotrichosis                   | 7  | 1 (14.29) | 6 (85.71)  | 4 (57.14)  | 3 (42.86)  | 51 (47-66) | 0    | 0    | 0    | 0.08 | 0.21 | 0.05 |
| Strongyloidiasis                 | 5  | 3 (60.00) | 2 (40.00)  | 3 (60.00)  | 2 (40.00)  | 68 (62-75) | 0    | 0.06 | 0    | 0.08 | 0    | 0.03 |
| Obstetrical tetanus              | 5  | 0 (0.00)  | 5 (100.00) | 5 (100.00) | 0 (0.00)   | 27 (24-30) | 0    | 0    | 0    | 0.13 | 0    | 0.03 |
| Hookworm diseases                | 4  | 1 (25.00) | 3 (75.00)  | 3 (75.00)  | 1 (25.00)  | 51 (44-56) | 0    | 0    | 0.09 | 0    | 0.05 | 0.03 |
| Gas gangrene                     | 3  | 2 (66.67) | 1 (33.33)  | 3 (100.00) | 0 (0.00)   | 60 (55-70) | 0    | 0    | 0.03 | 0.05 | 0    | 0.02 |
| Acanthamoebiasis                 | 3  | 2 (66.67) | 1 (33.33)  | 2 (66.67)  | 1 (33.33)  | 30 (27-33) | 0    | 0.03 | 0    | 0.05 | 0    | 0.02 |
| External hirudiniasis            | 1  | 0 (0.00)  | 1 (100.00) | 1 (100.00) | 0 (0.00)   | 69 (69-69) | 0    | 0.03 | 0    | 0    | 0    | 0.01 |
| Phaeohyphomycosis                | 1  | 0 (0.00)  | 1 (100.00) | 0 (0.00)   | 1 (100.00) | 40 (40-40) | 0    | 0    | 0    | 0.03 | 0    | 0.01 |

\*Total number of cases during January 2013 to June 2017.

†Infectious diarrhoeal diseases other than cholera, bacterial dysentery, amoebic dysentery, typhoid, and paratyphoid.

HIV=human immunodeficiency virus, PIPSM=picornavirus infections presenting in the skin or mucous membranes.

# Respiratory

## Influenza

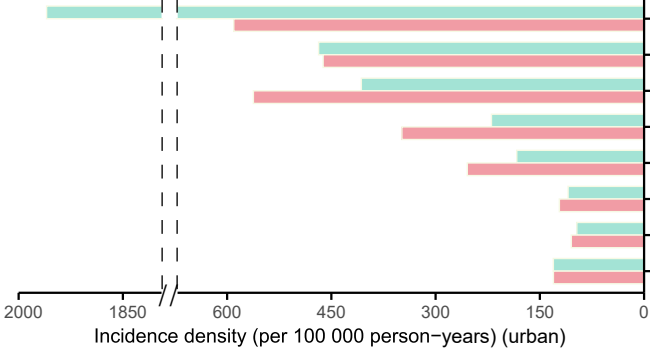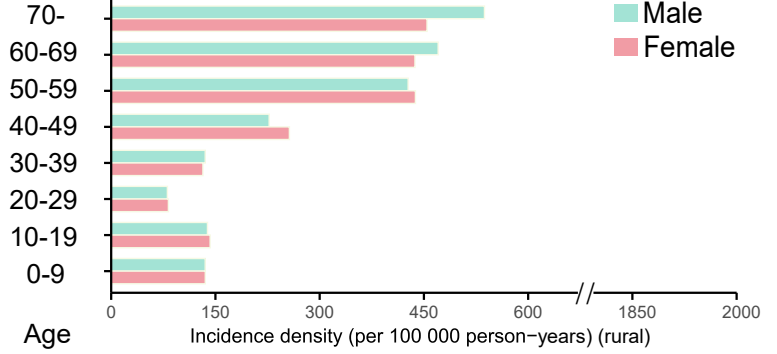

## Pneumonia

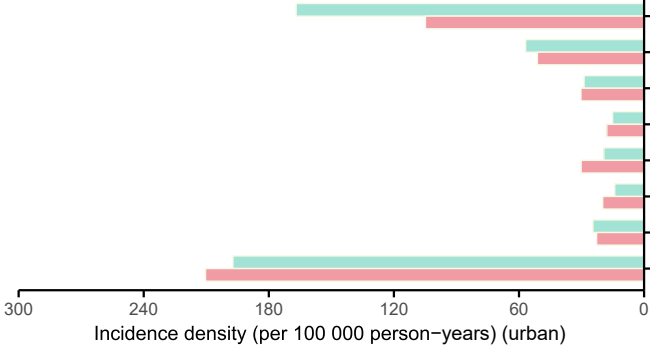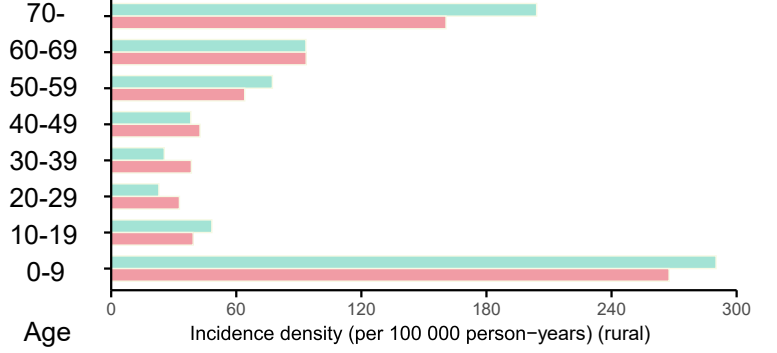

## Pulmonary tuberculosis

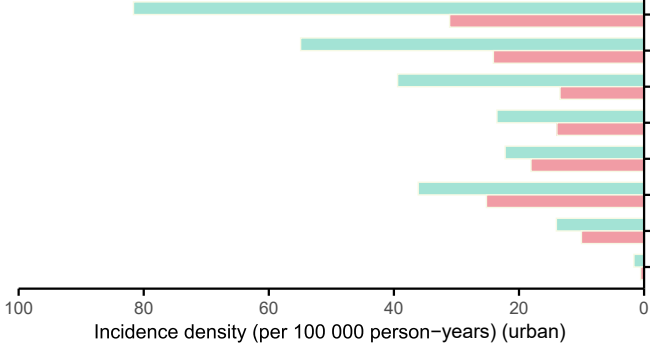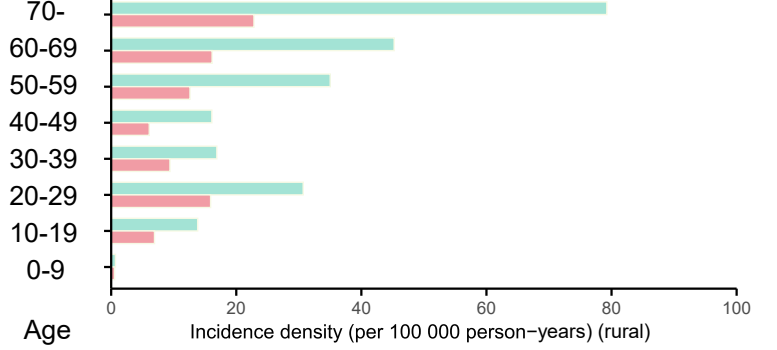

## Varicella

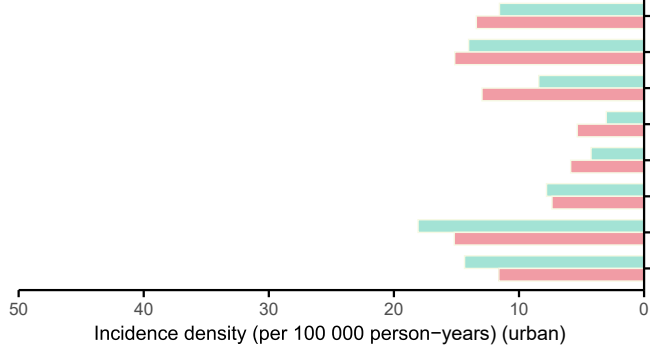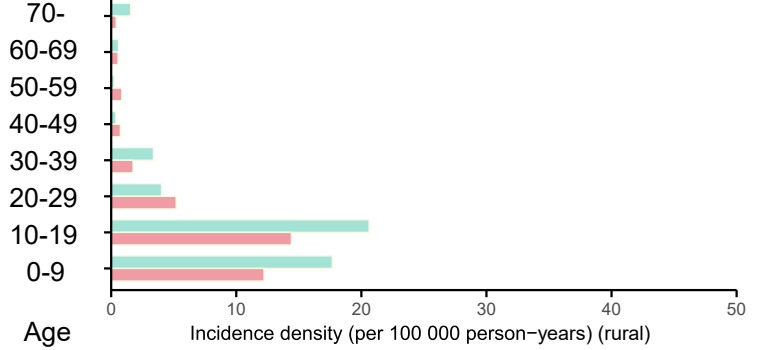

## Scarlet fever

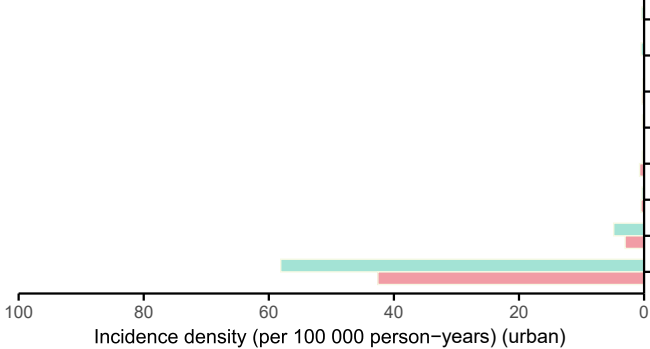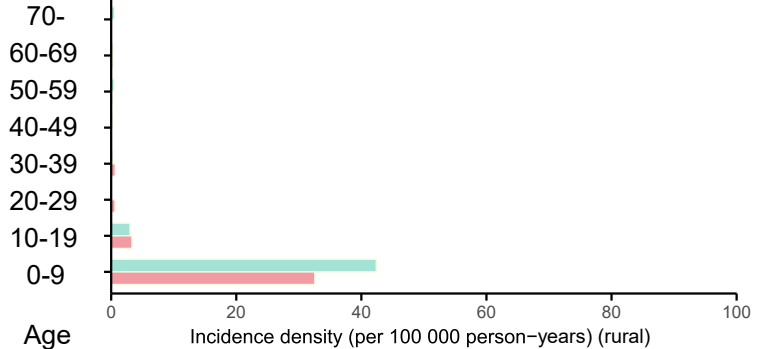

## Mumps

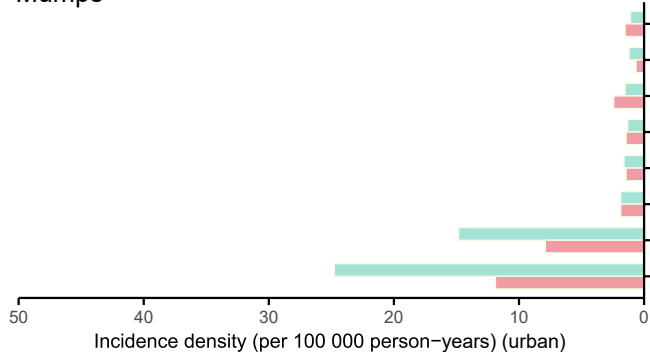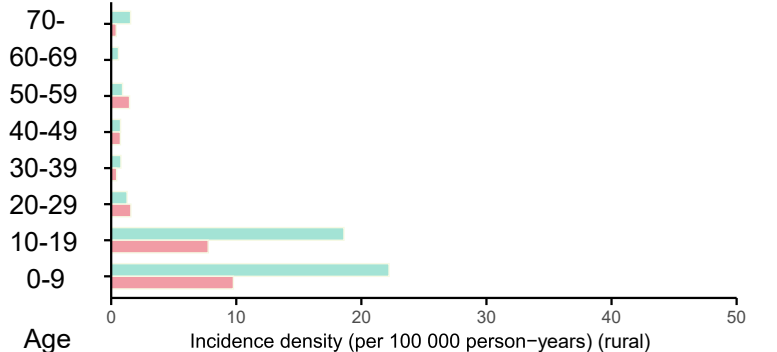

### Measles

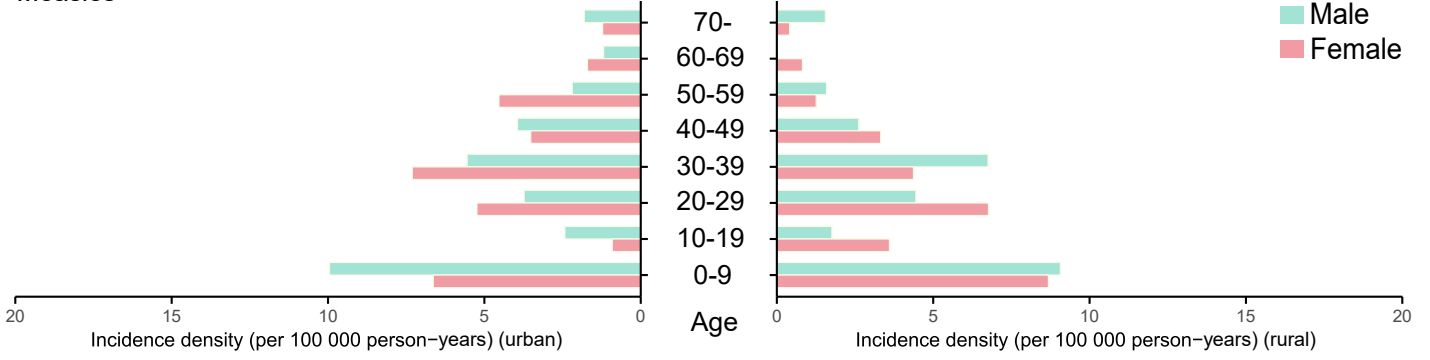

### Cryptococcosis

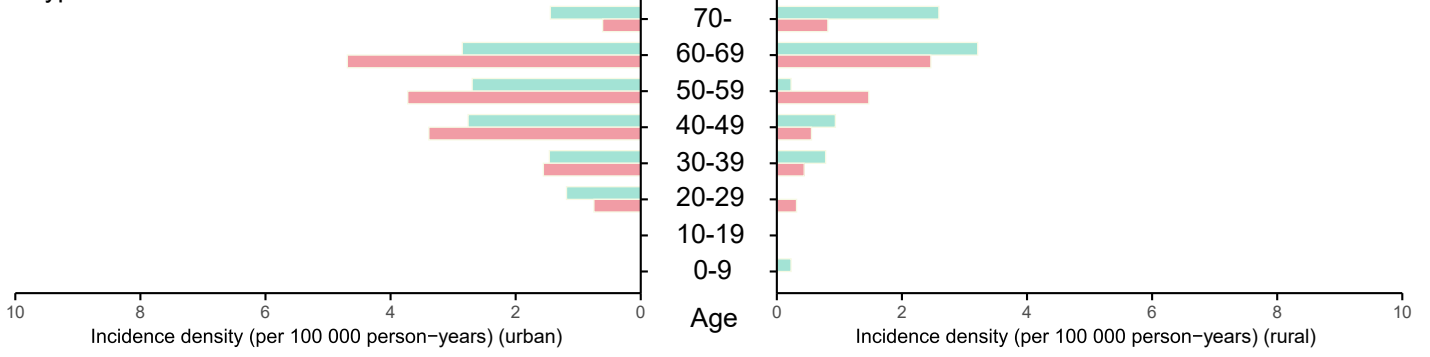

### Rubella

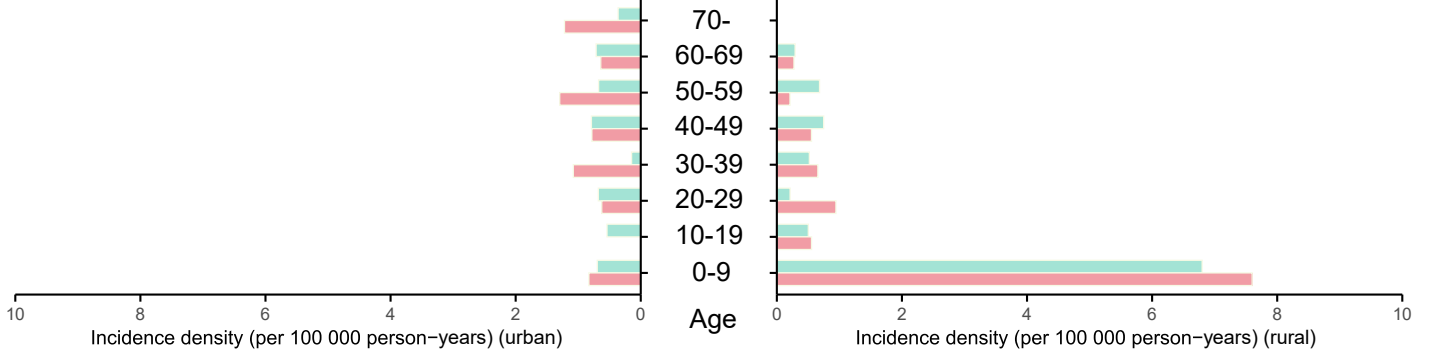

### Whooping cough

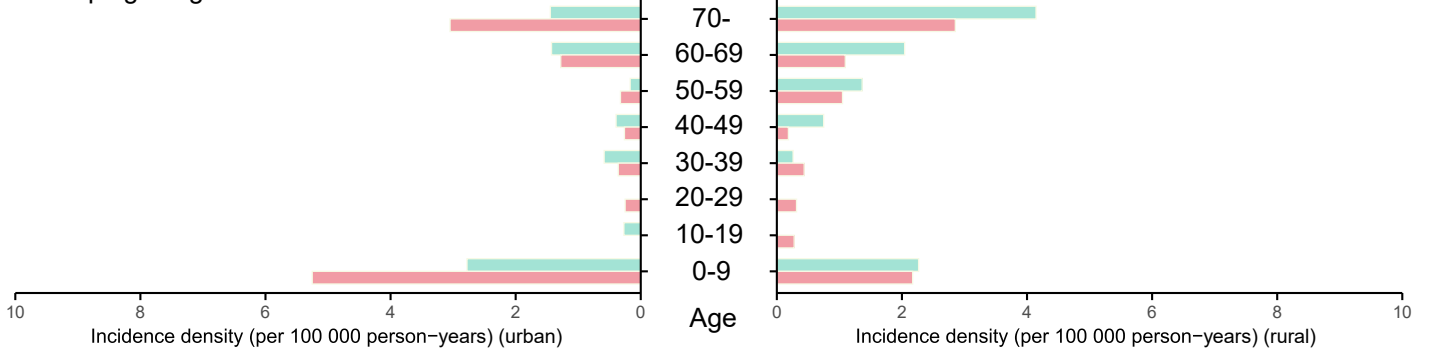

### Aspergillosis

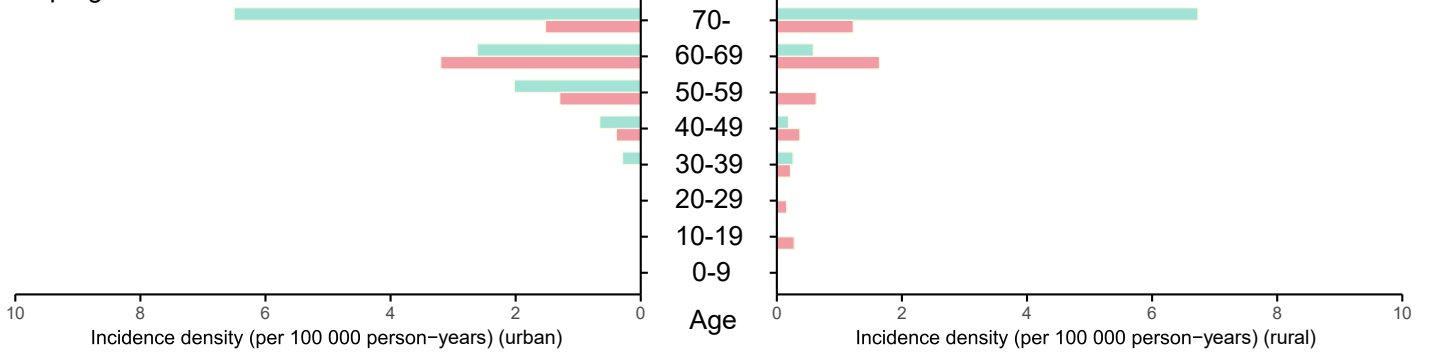

### Roseola infantum

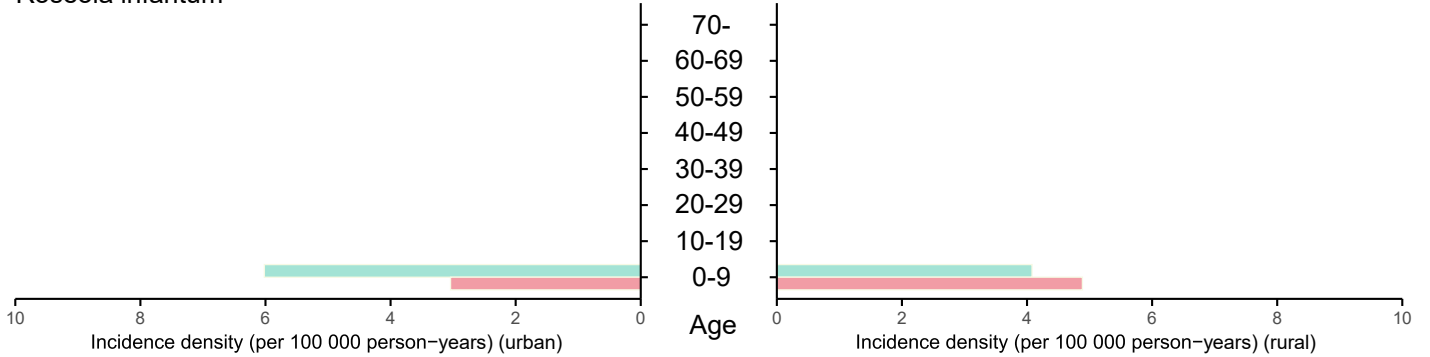

# Gastrointestinal

Typhoid

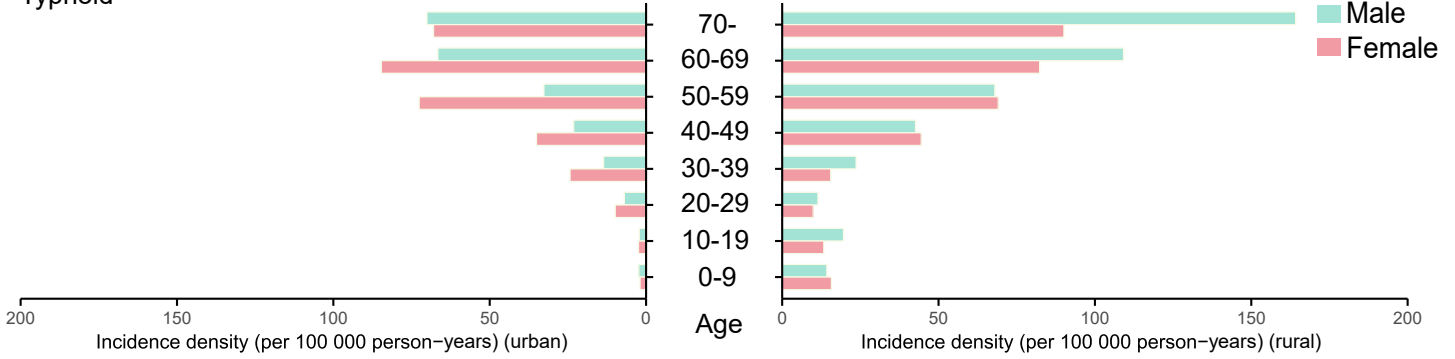

Other infectious diarrhoea

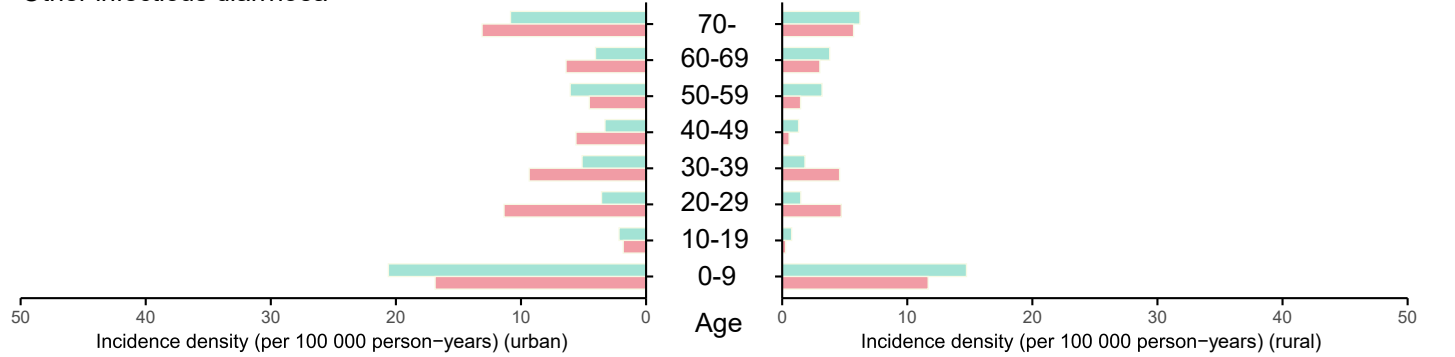

Ascariasis

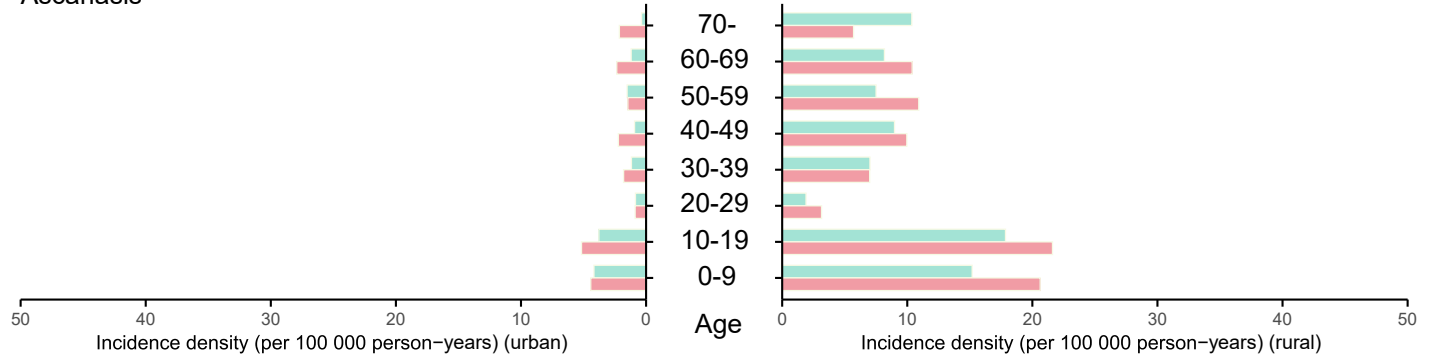

Bacterial dysentery

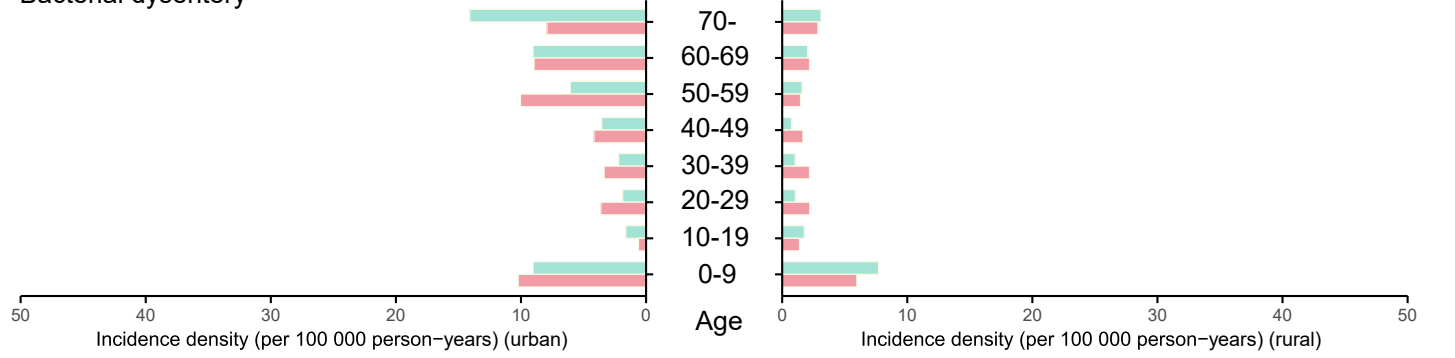

Paratyphoid

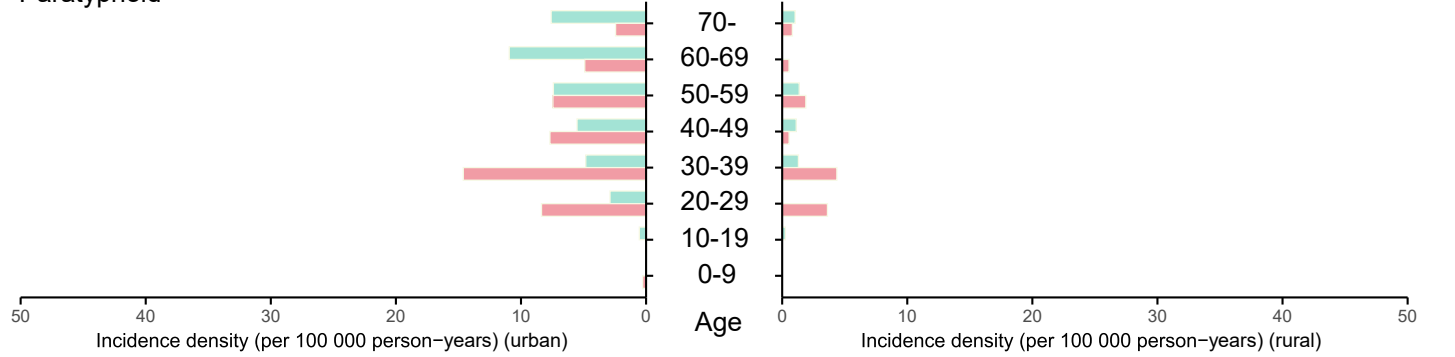

Amoebic dysentery

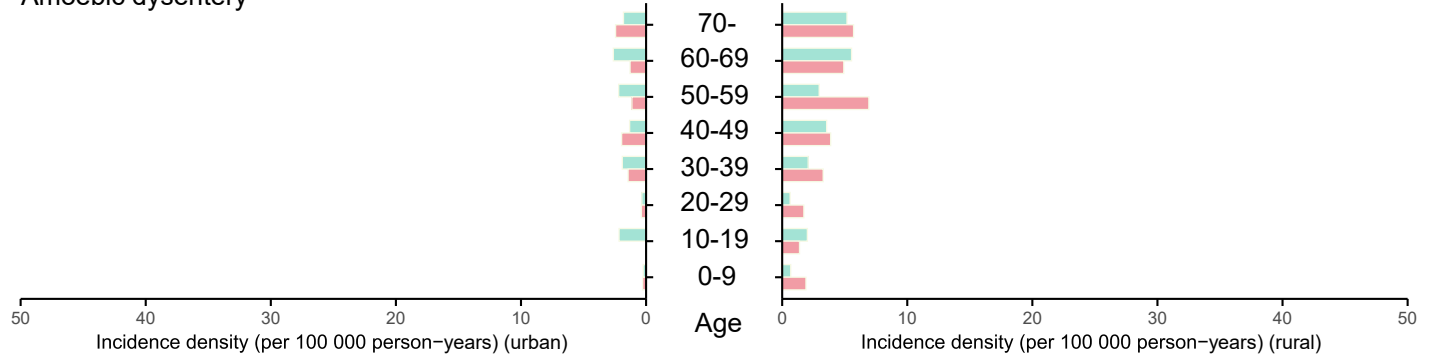

### Gastroenteritis due to Rotavirus

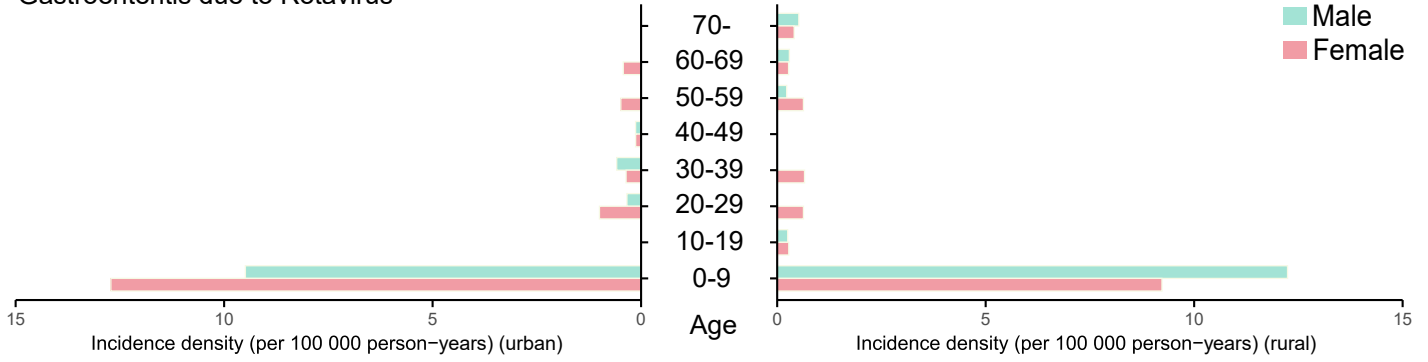

### Intestinal infections due to *Escherichia coli*

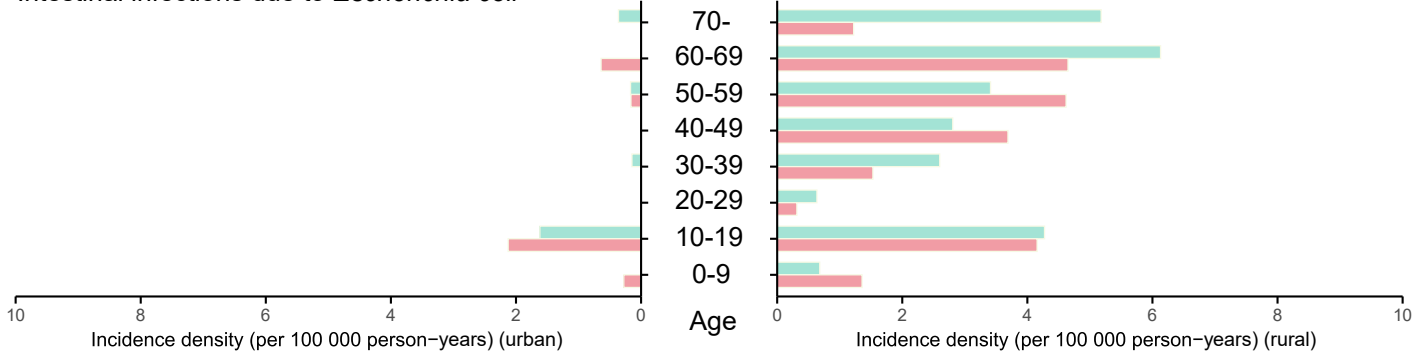

### Oesophagostomiasis

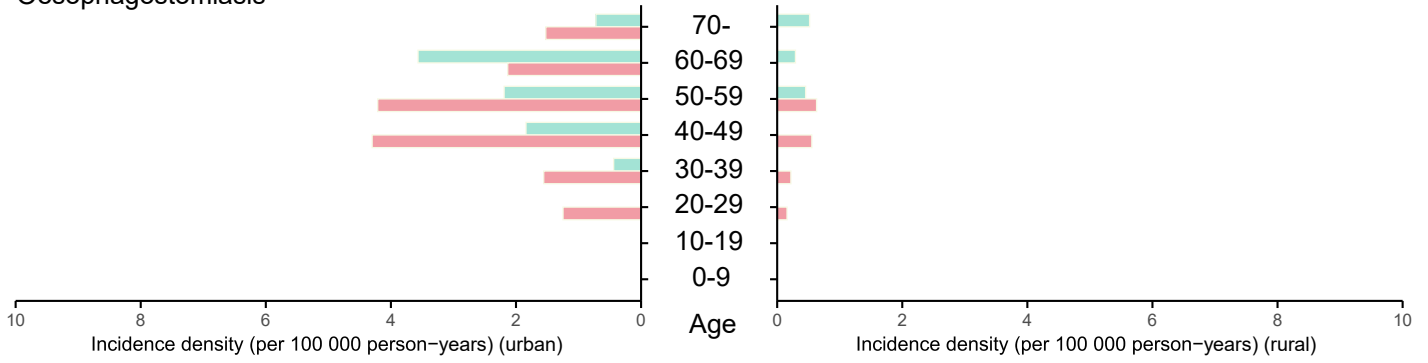

### Hepatitis A

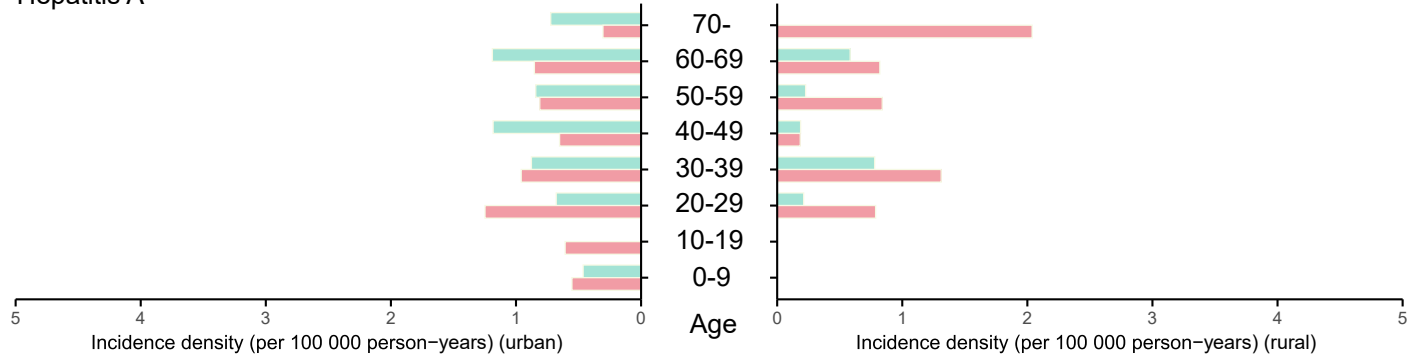

### Enterobiasis

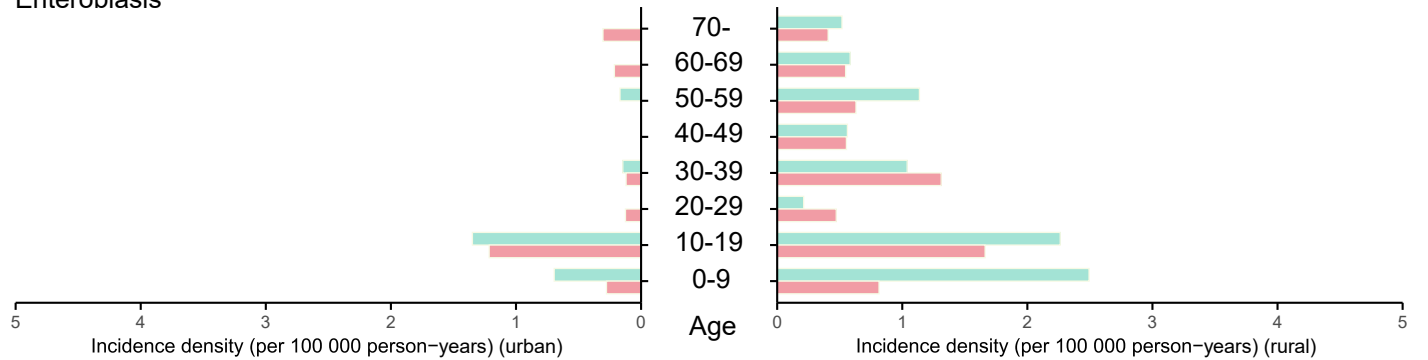

### Hepatitis E

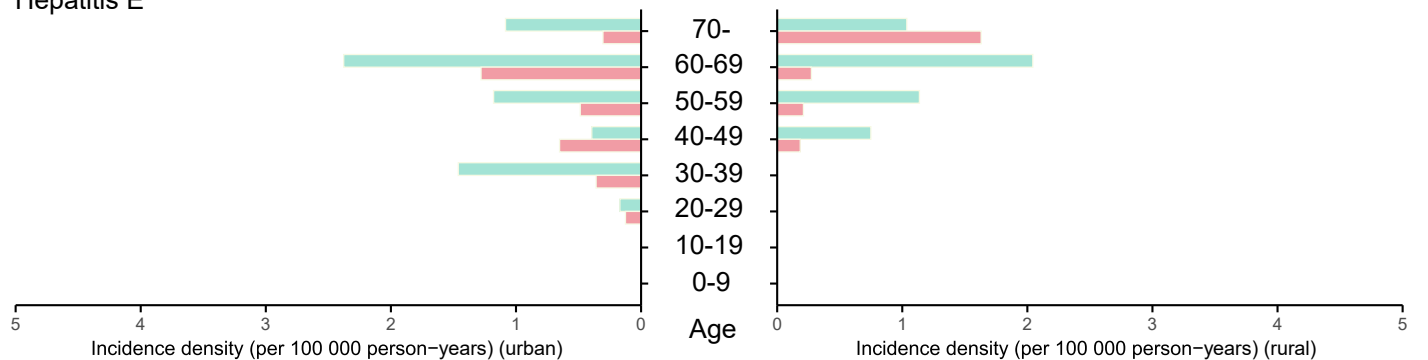

Bacterial foodborne intoxications, unspecified

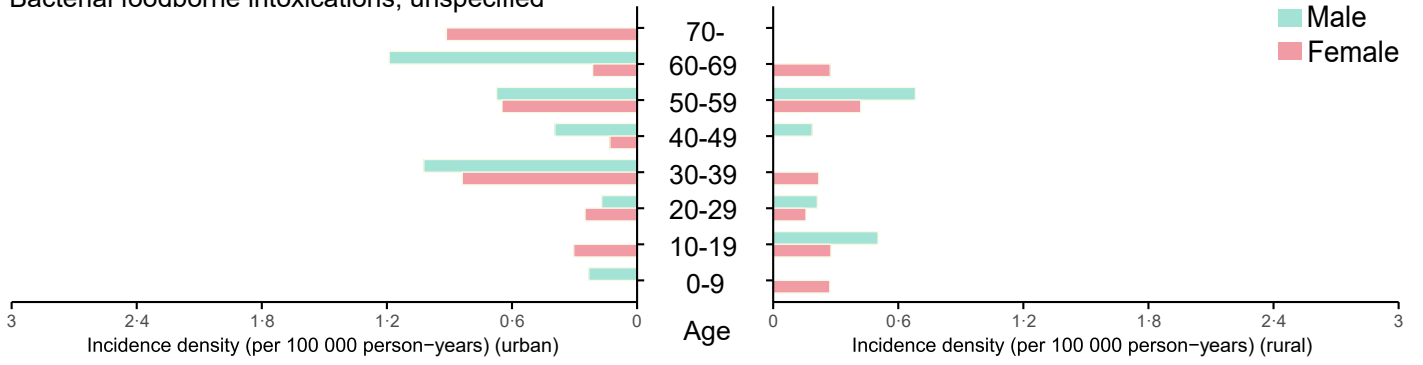

**Vector-borne**

Brucellosis

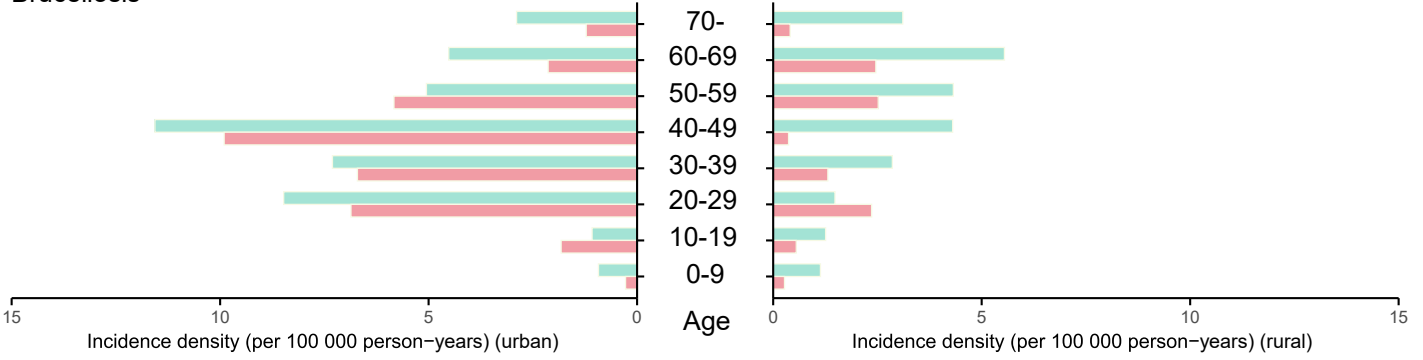

Hemorrhagic fever

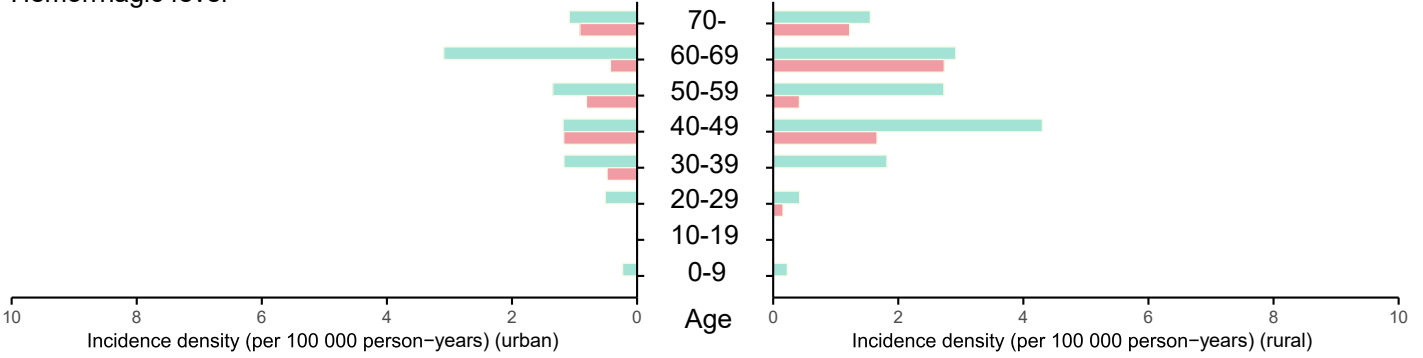

**Blood-transmitted and sex-transmitted**

Hepatitis B

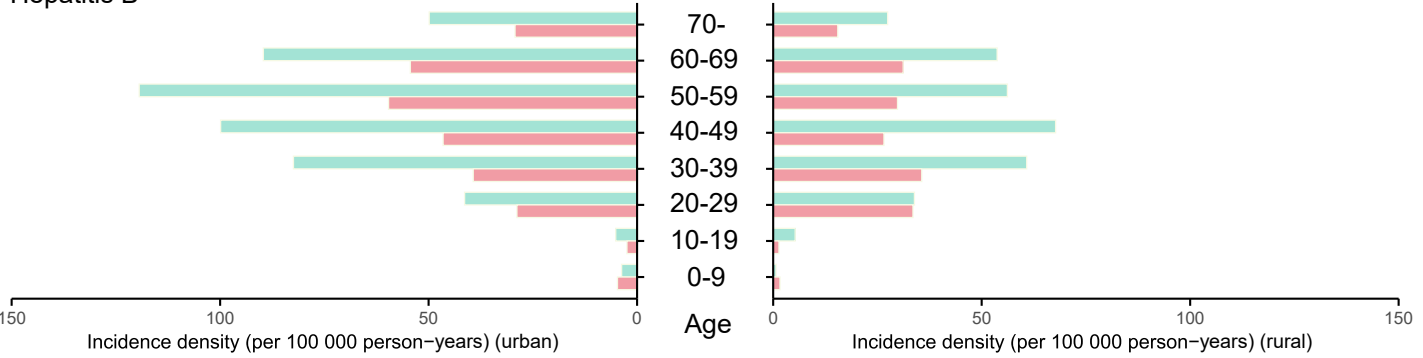

Syphilis

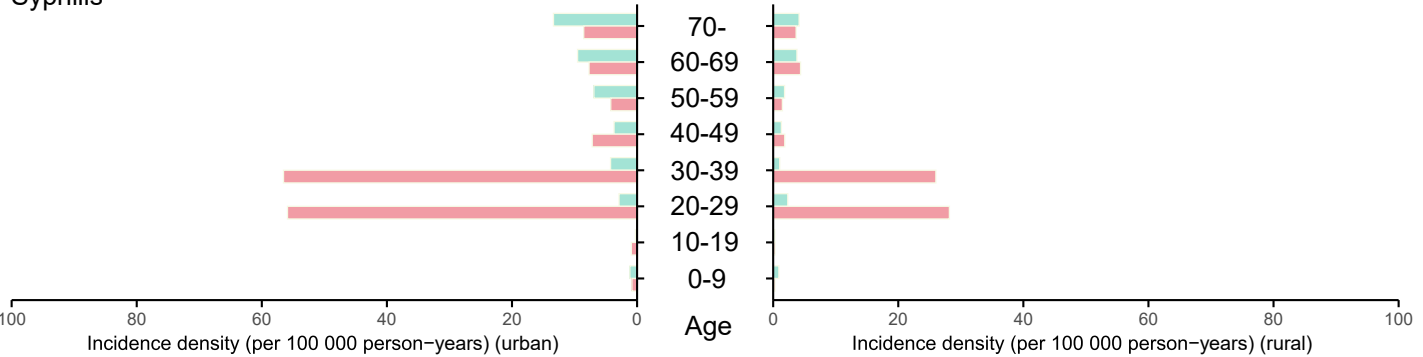

Hepatitis C

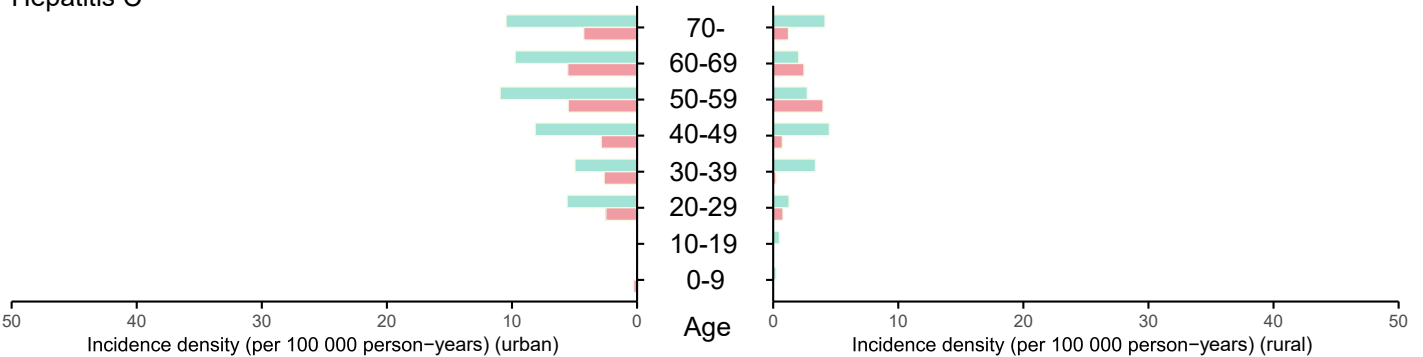

Gonorrhoea

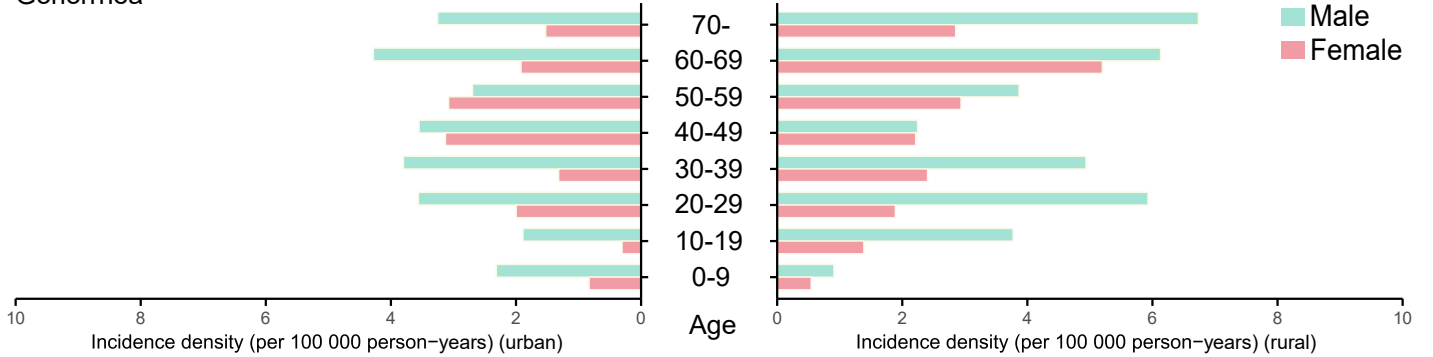

Trichomoniasis

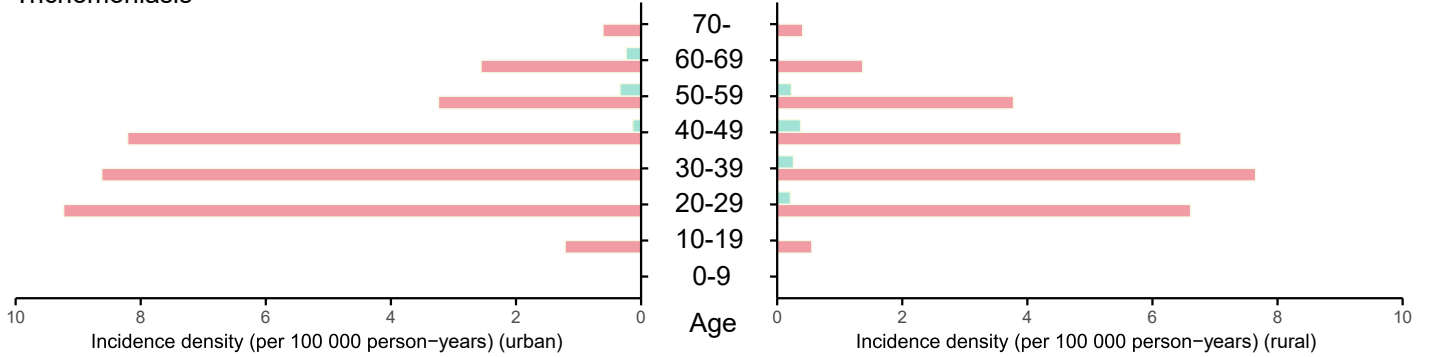

Anogenital warts

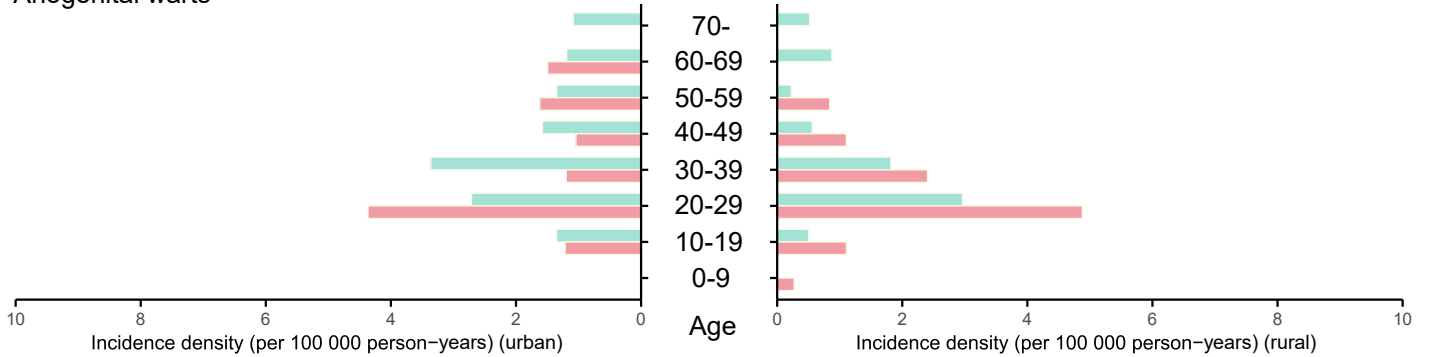

Cytomegaloviral disease

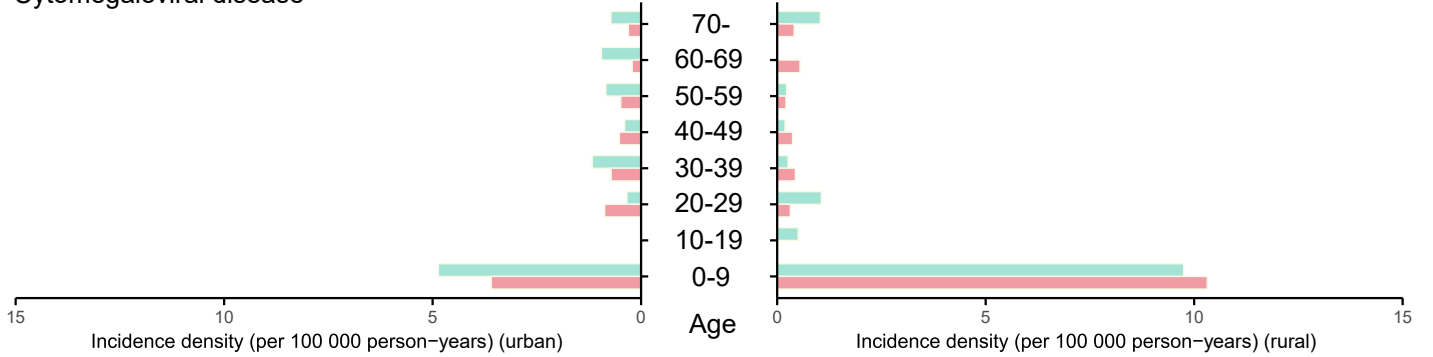

HIV infection

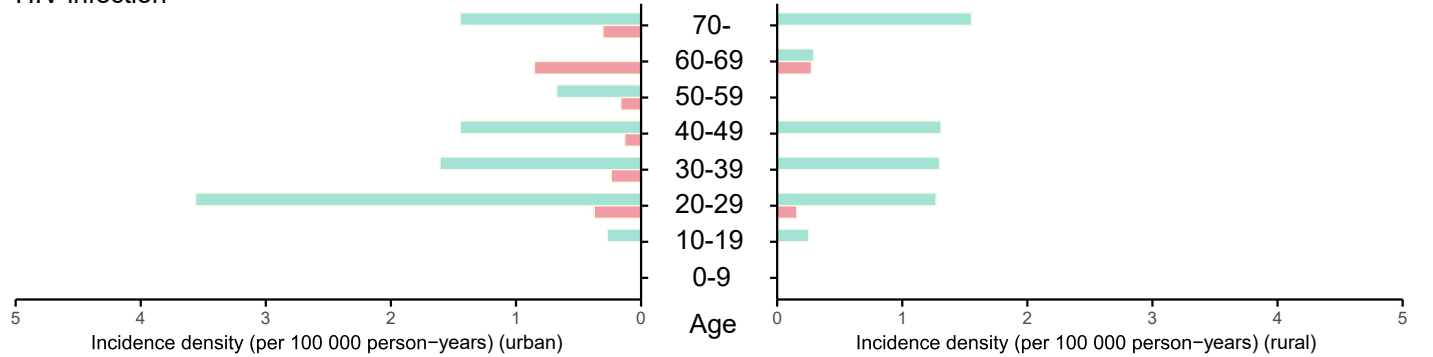

Anogenital herpes simplex infection

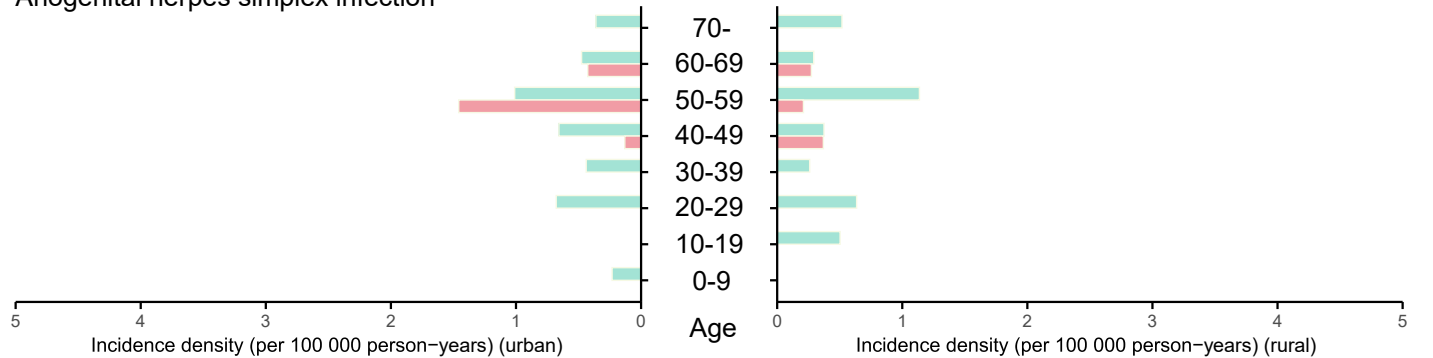

# Mucocutaneous

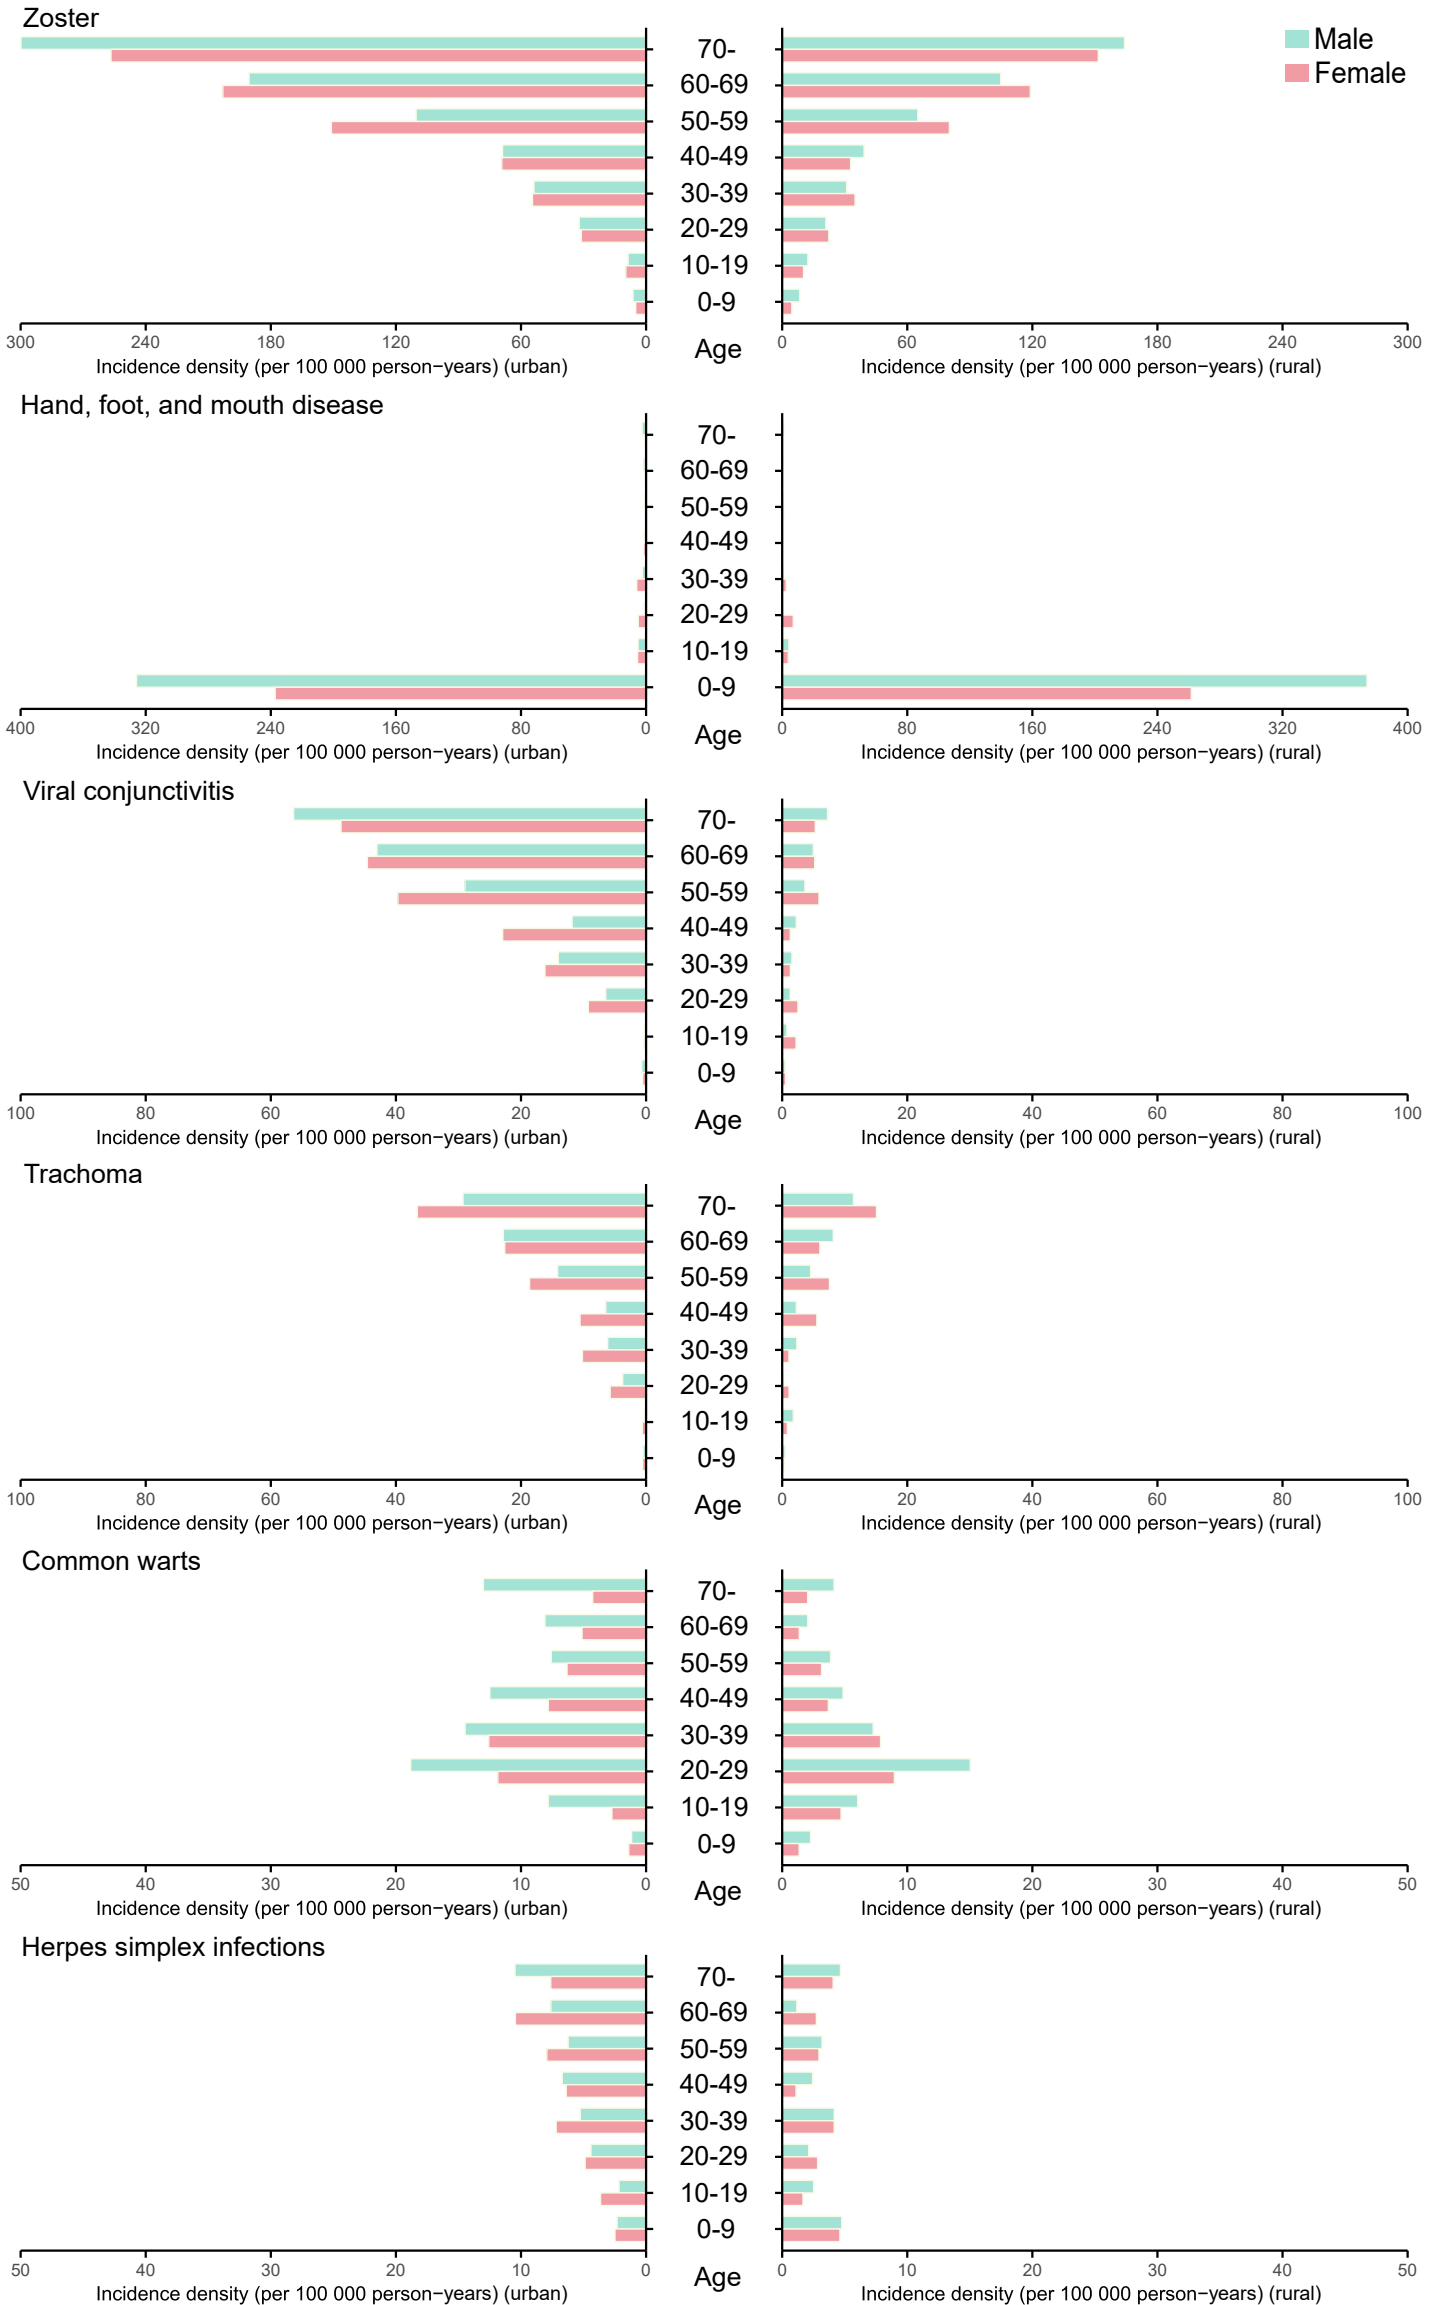



Plane warts

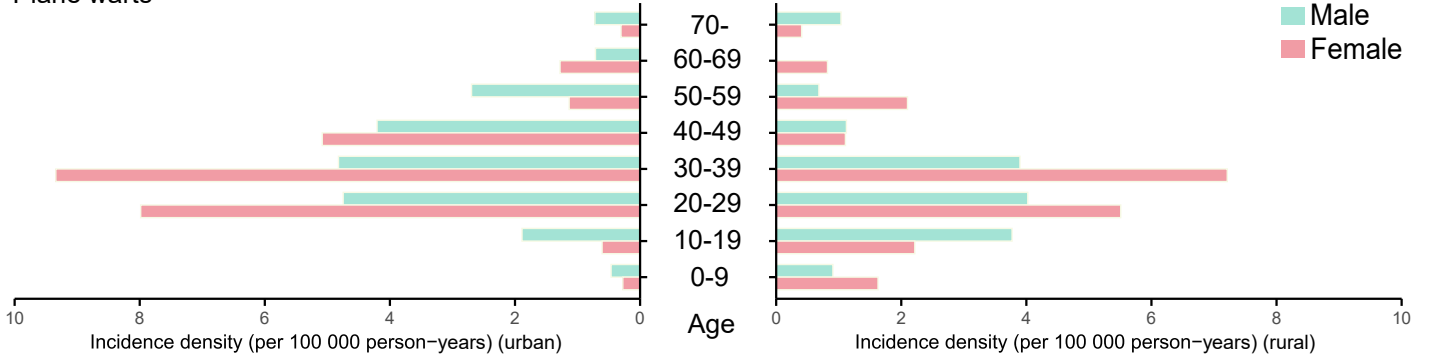

Impetigo

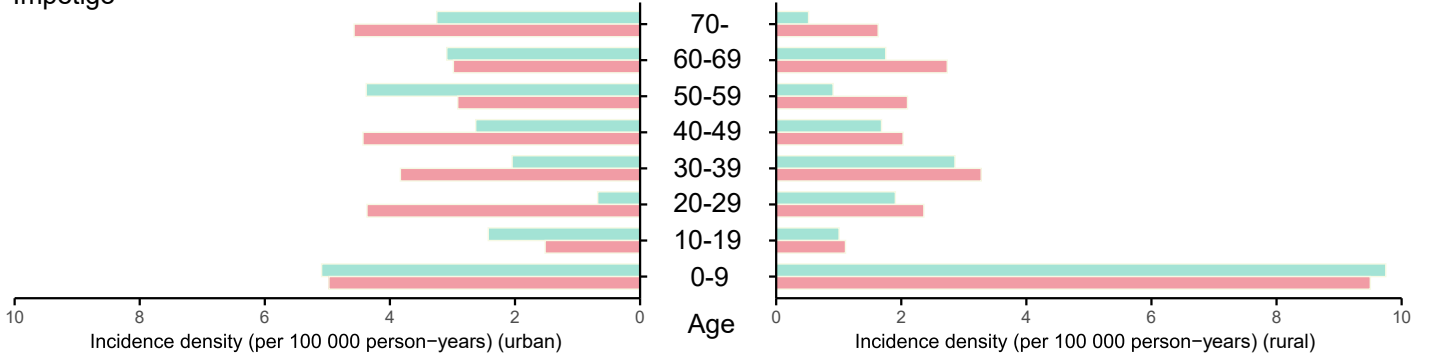

Non-dermatophyte superficial dermatomycoses

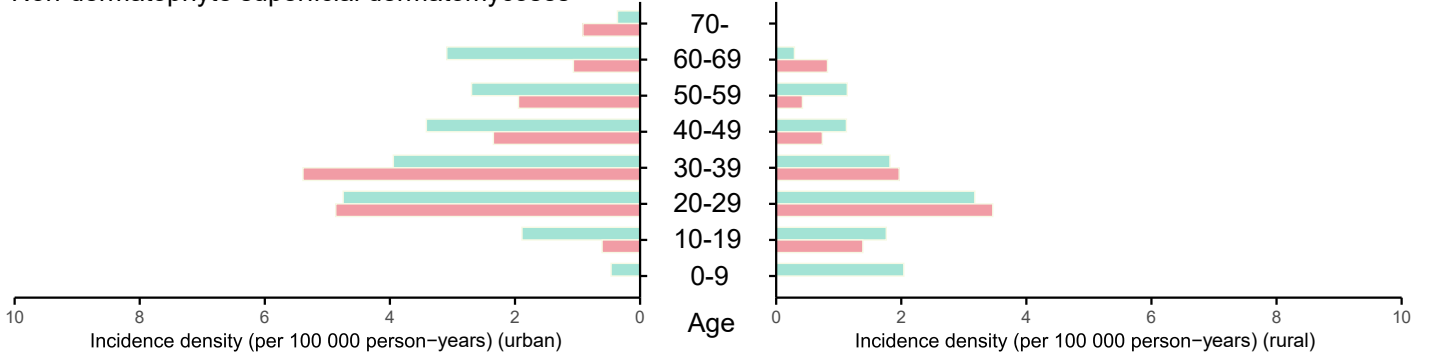

Molluscum contagiosum

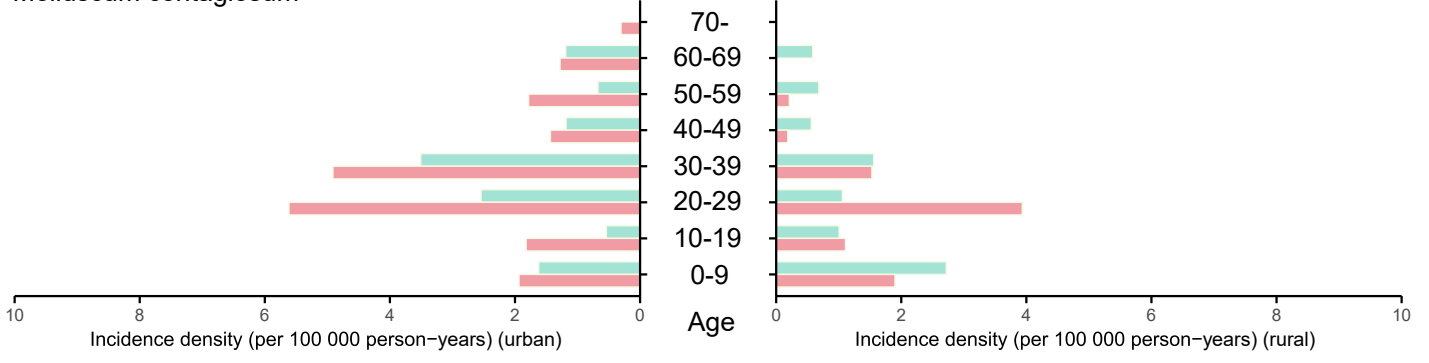

Infectious mononucleosis

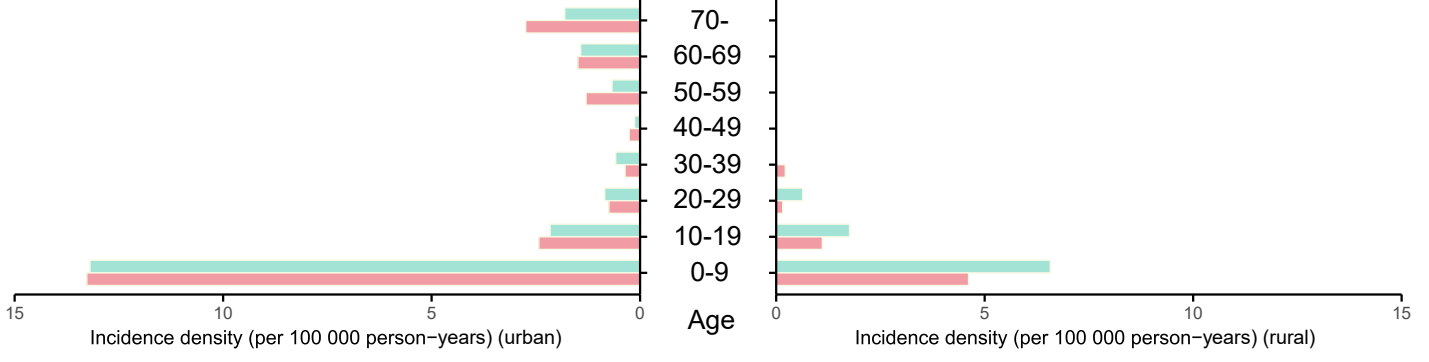

Scabies

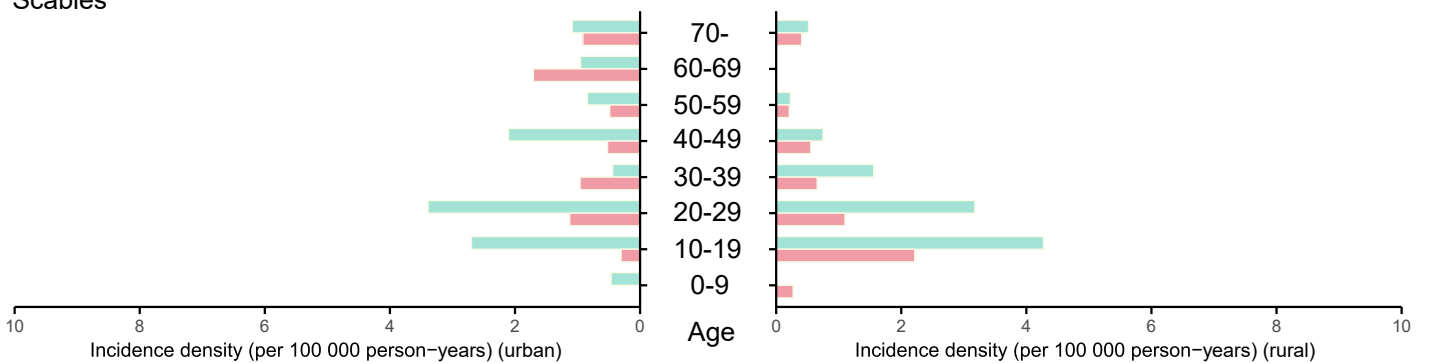

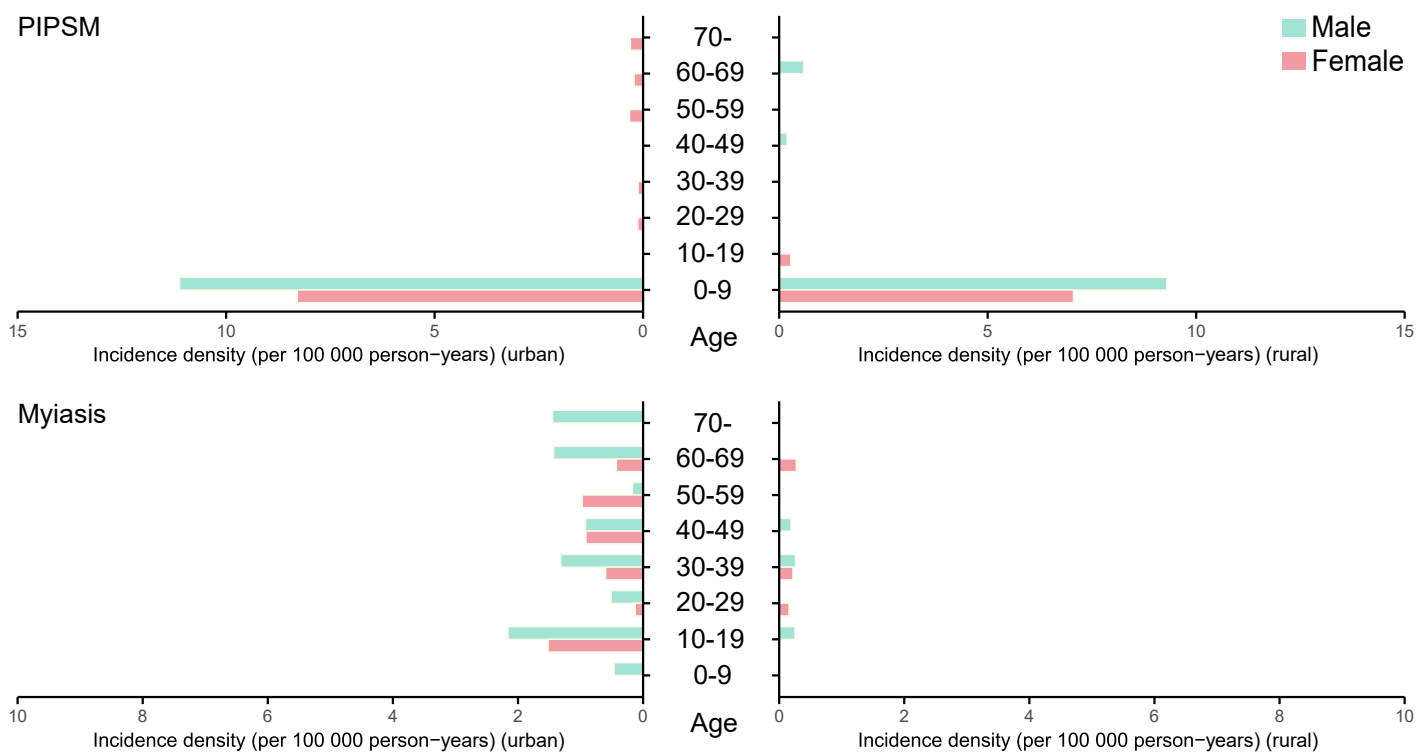

**Figure S2: Age and sex differences related to the incidence density of the top 50 infectious diseases across different geographical regions (urban vs. rural dimension).**

All infectious diseases with more than 50 cases (50 out of 130 infectious diseases) are shown.

HIV=human immunodeficiency virus, PIPSM=picornavirus infections presenting in the skin or mucous membranes.

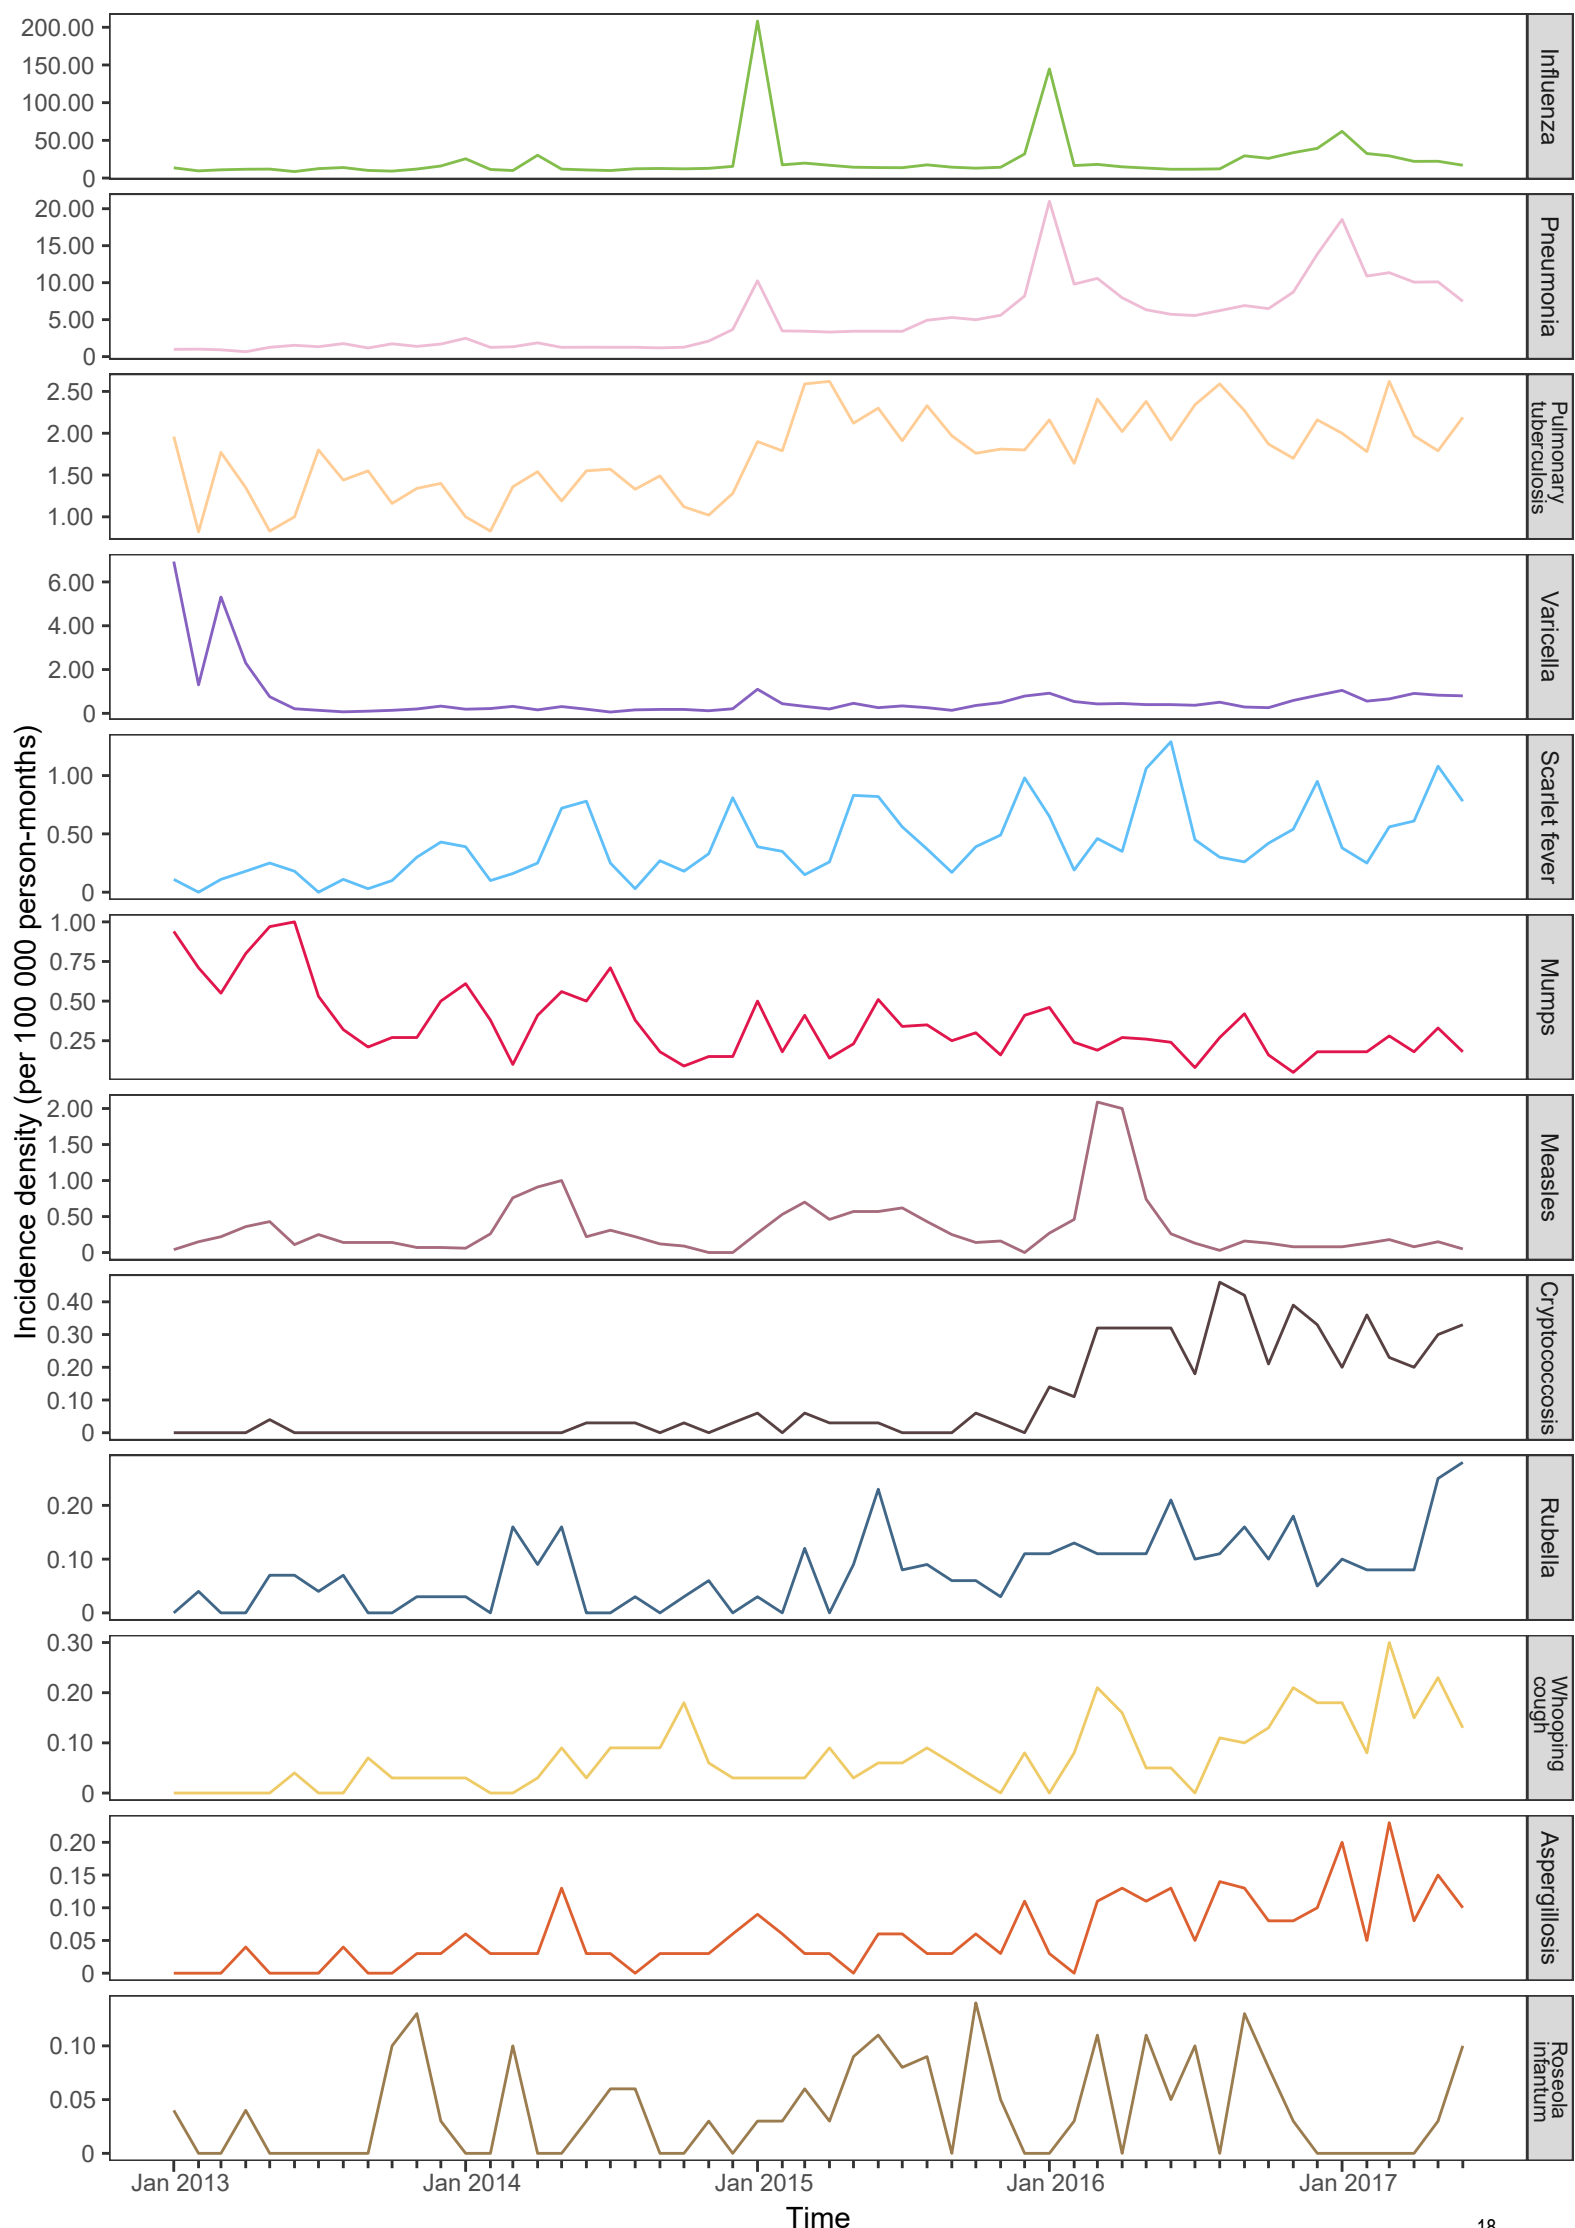

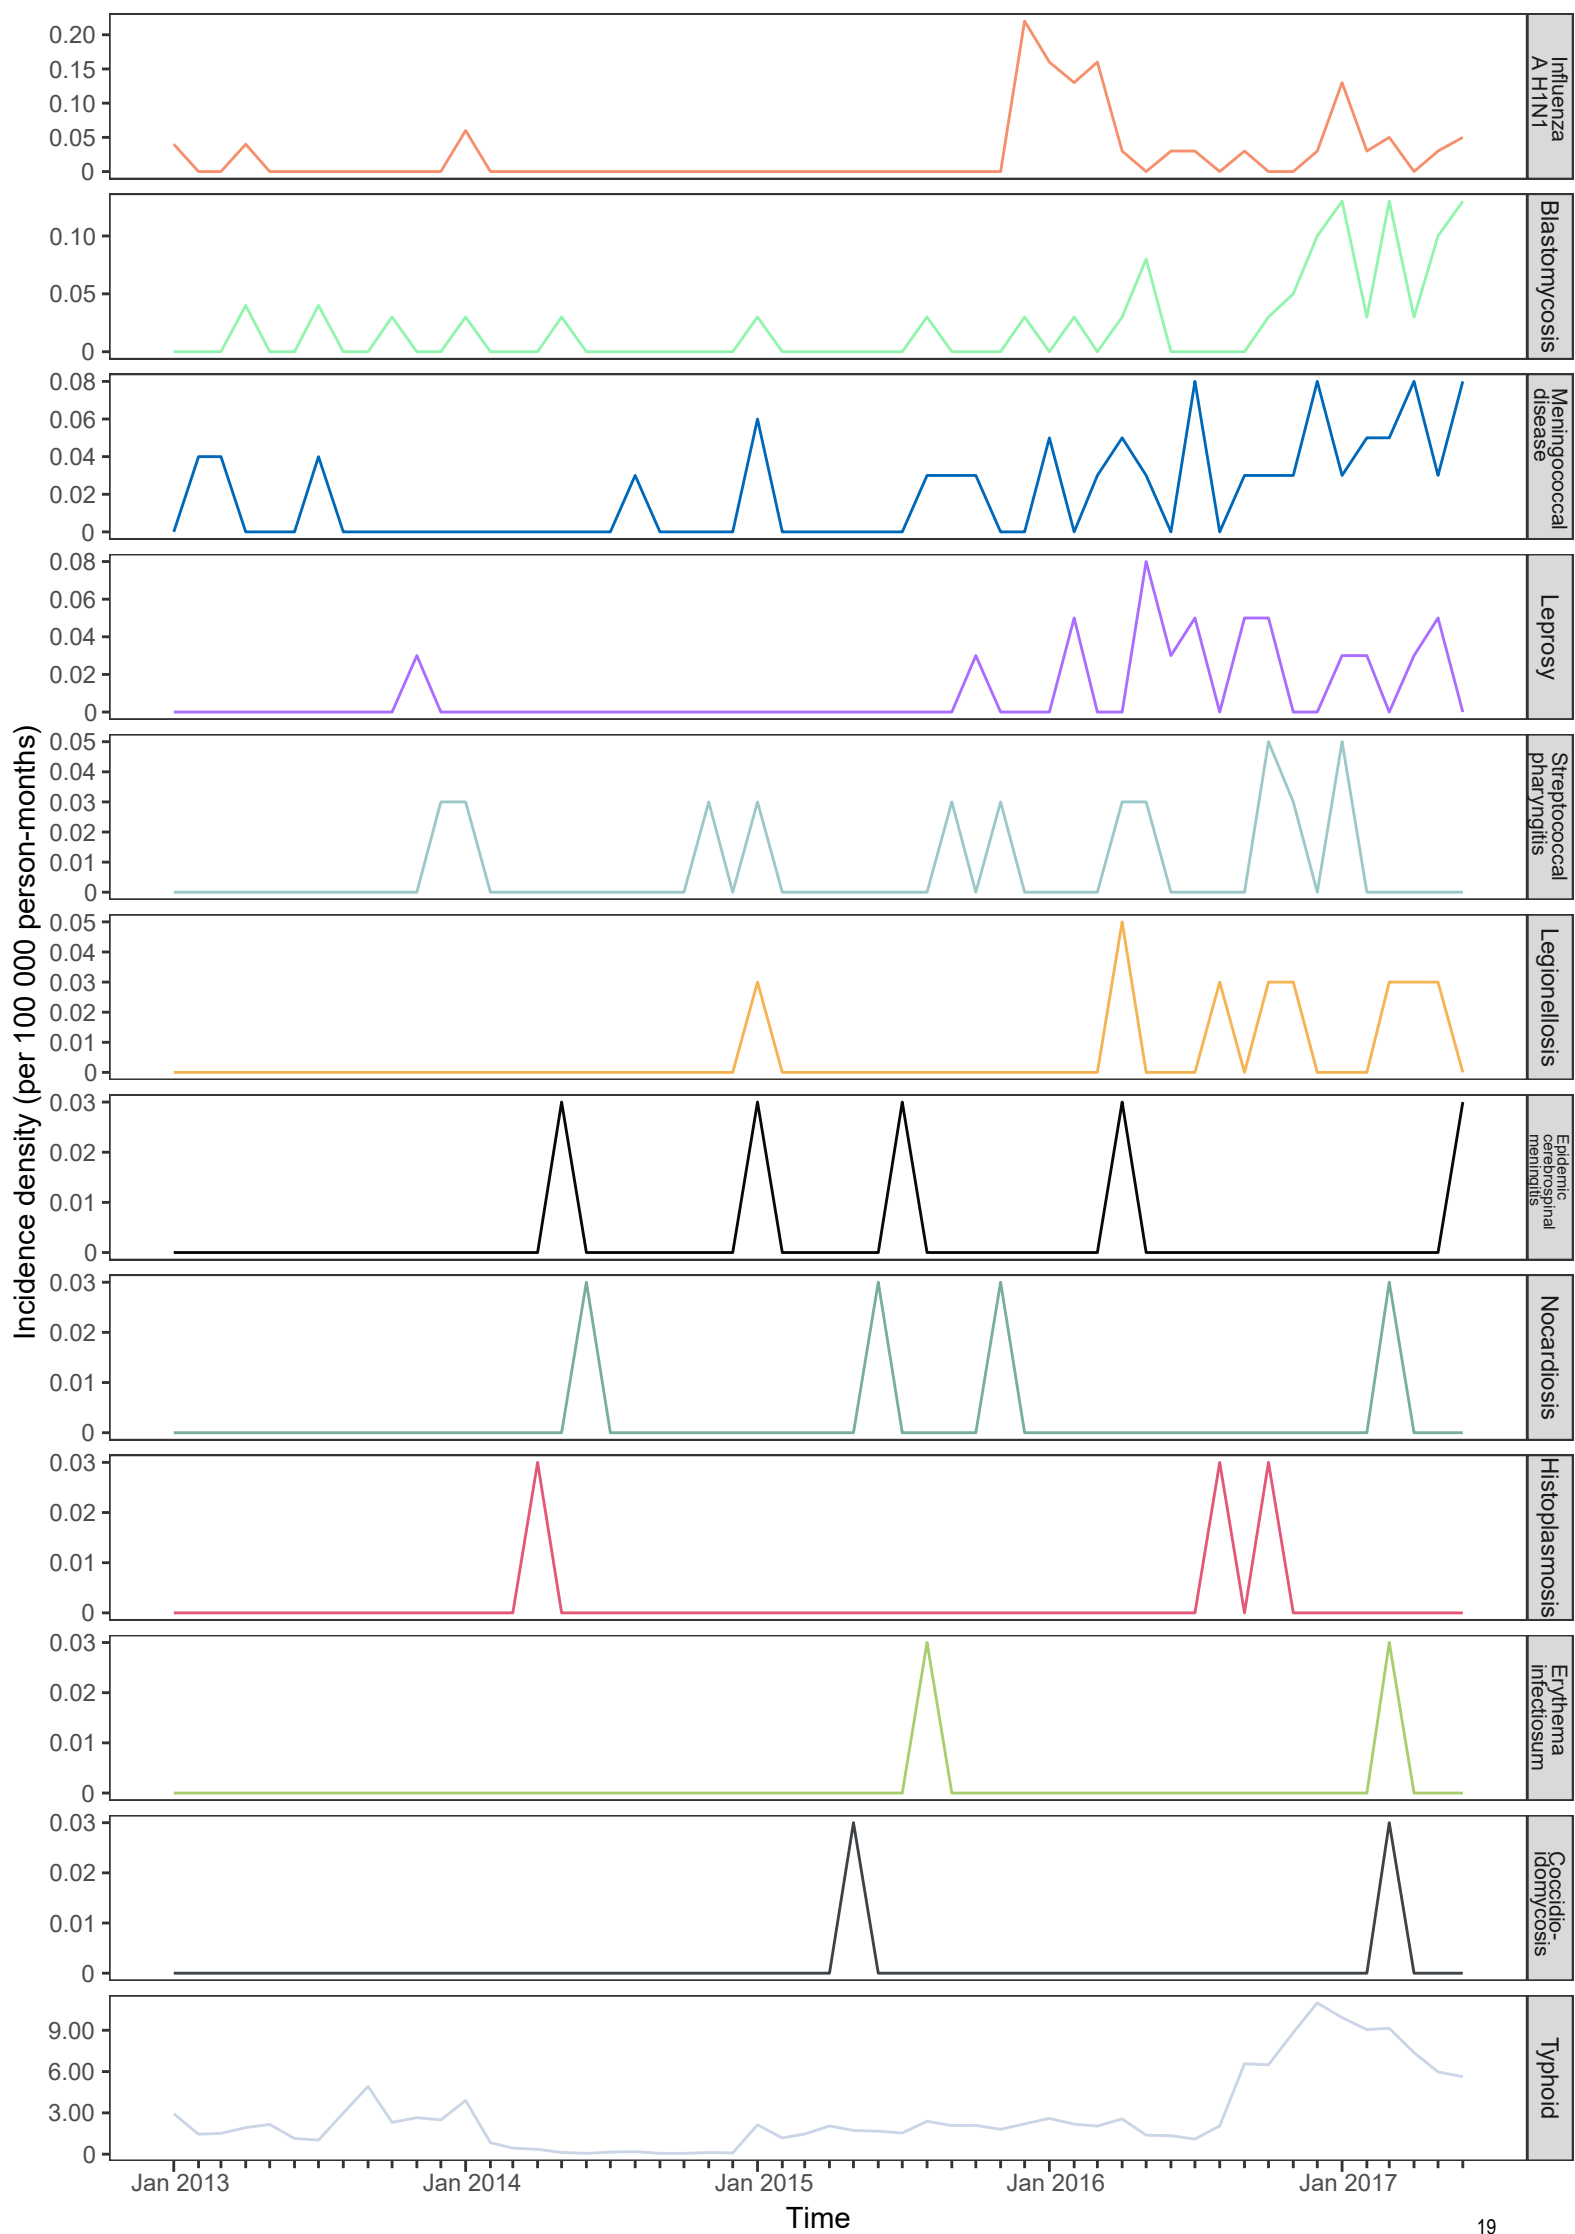

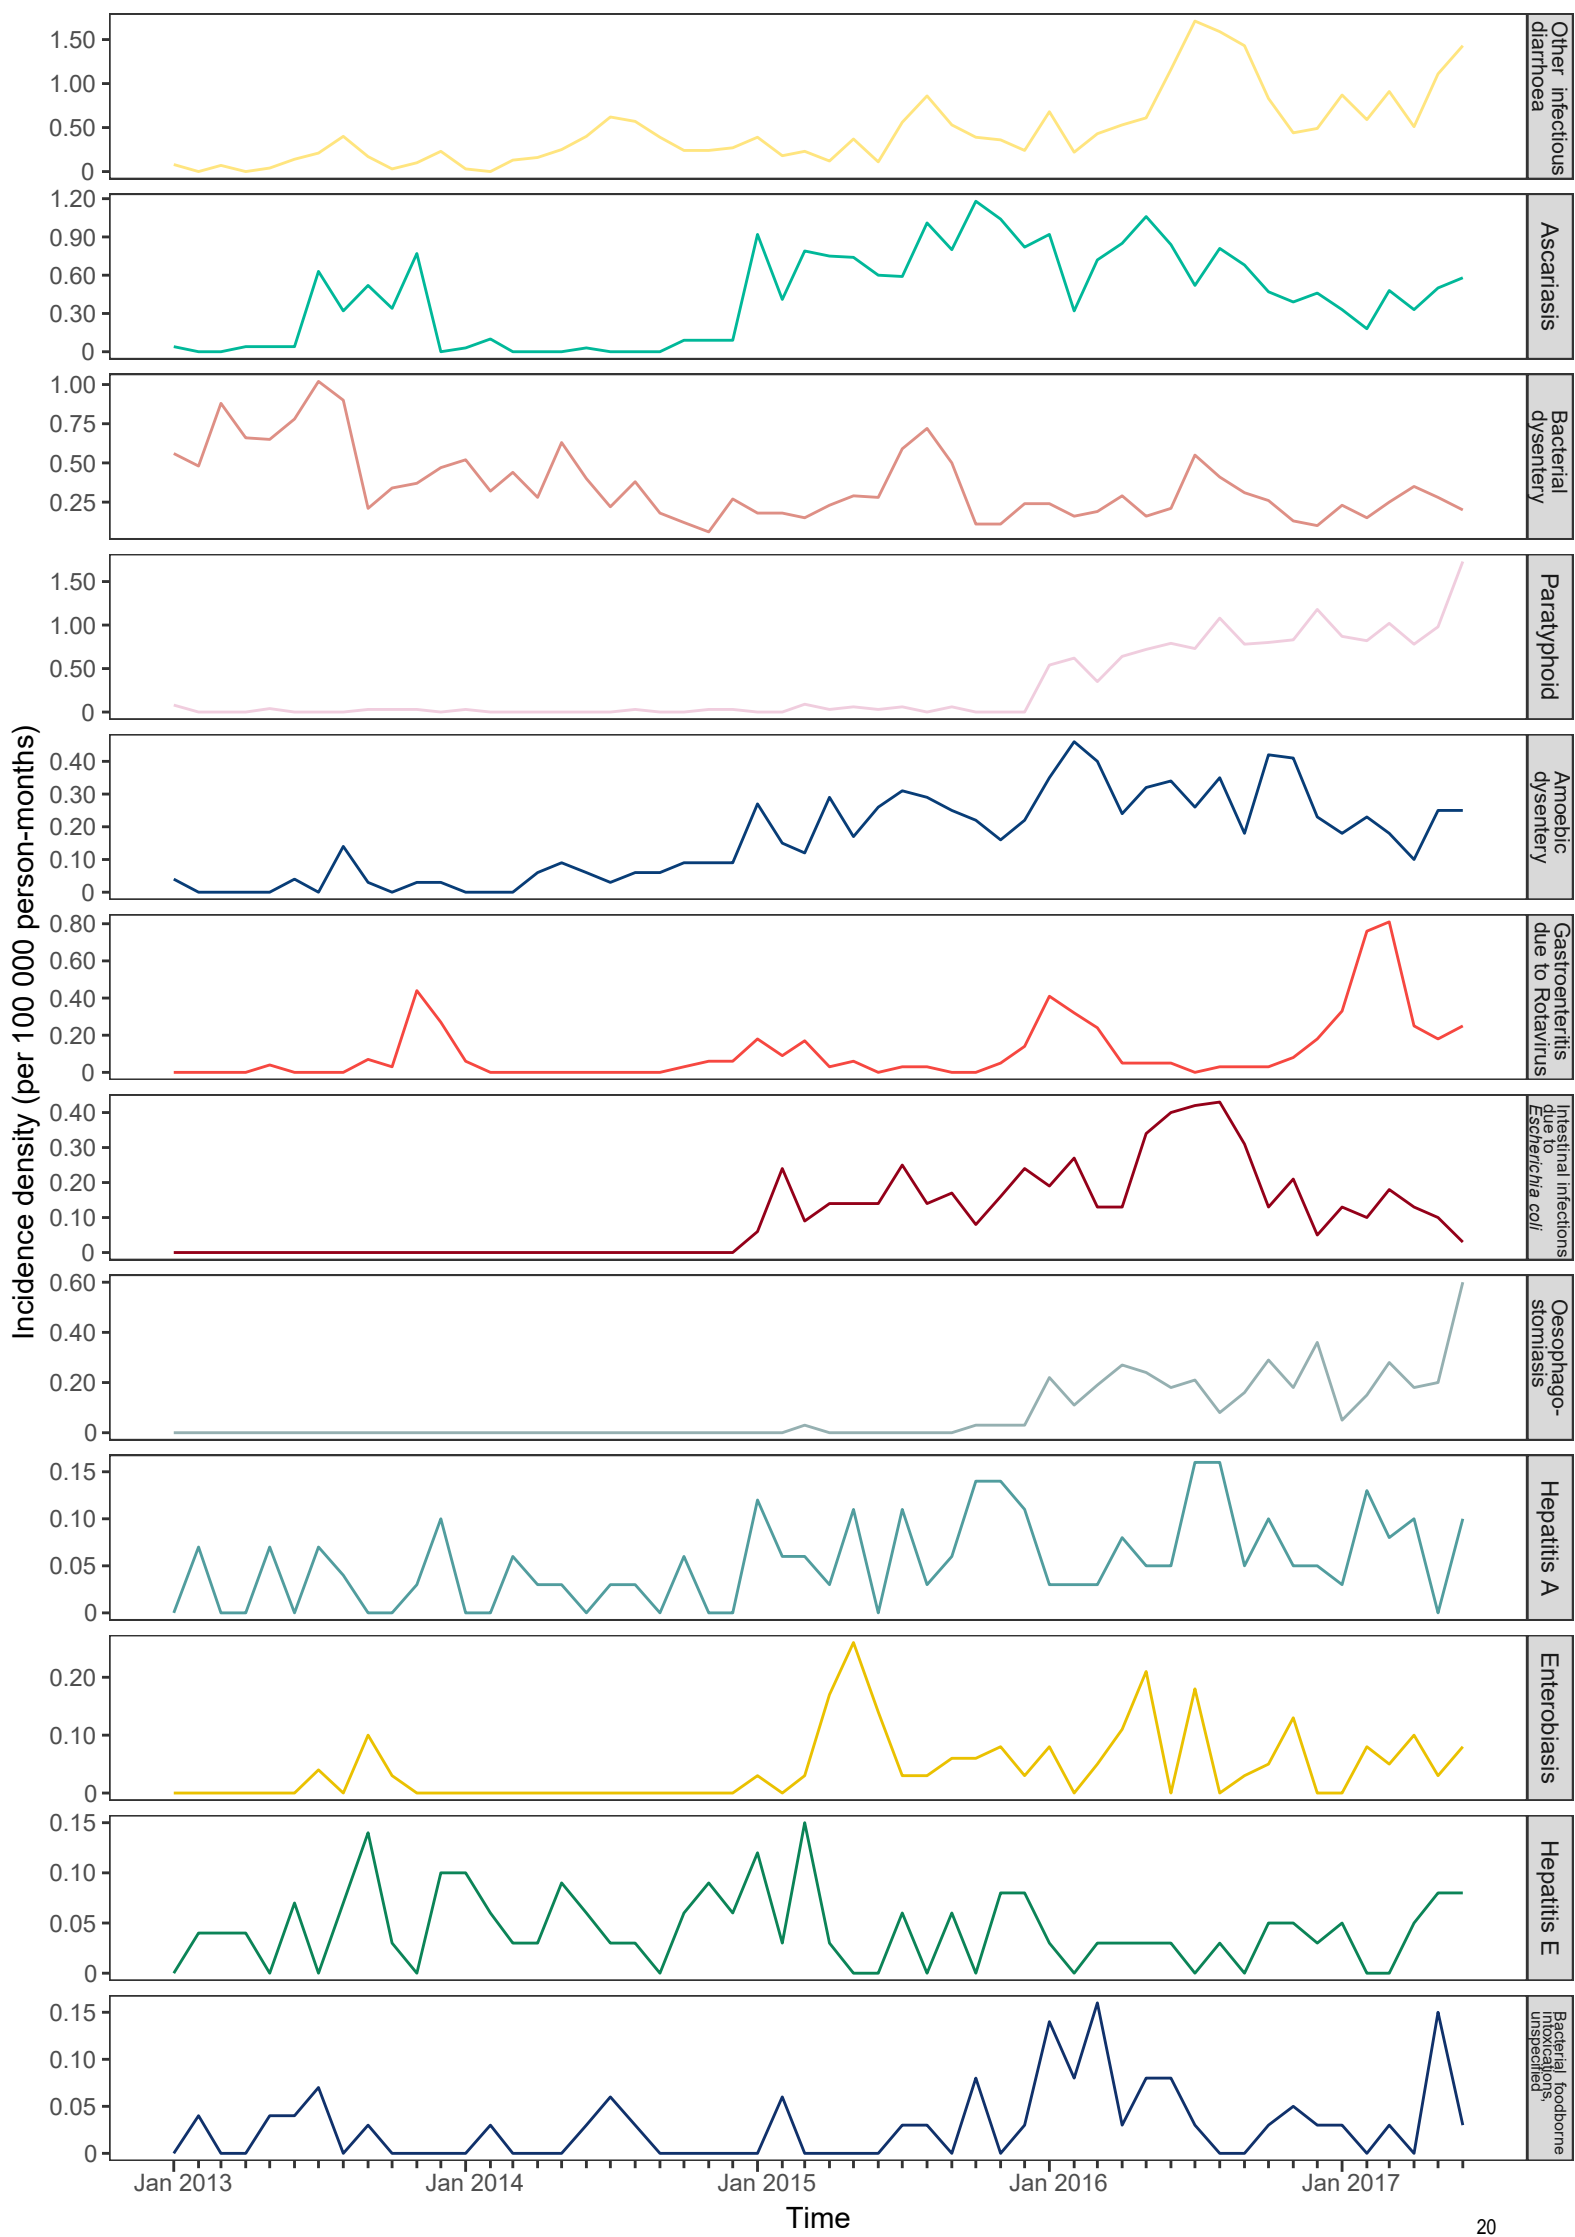

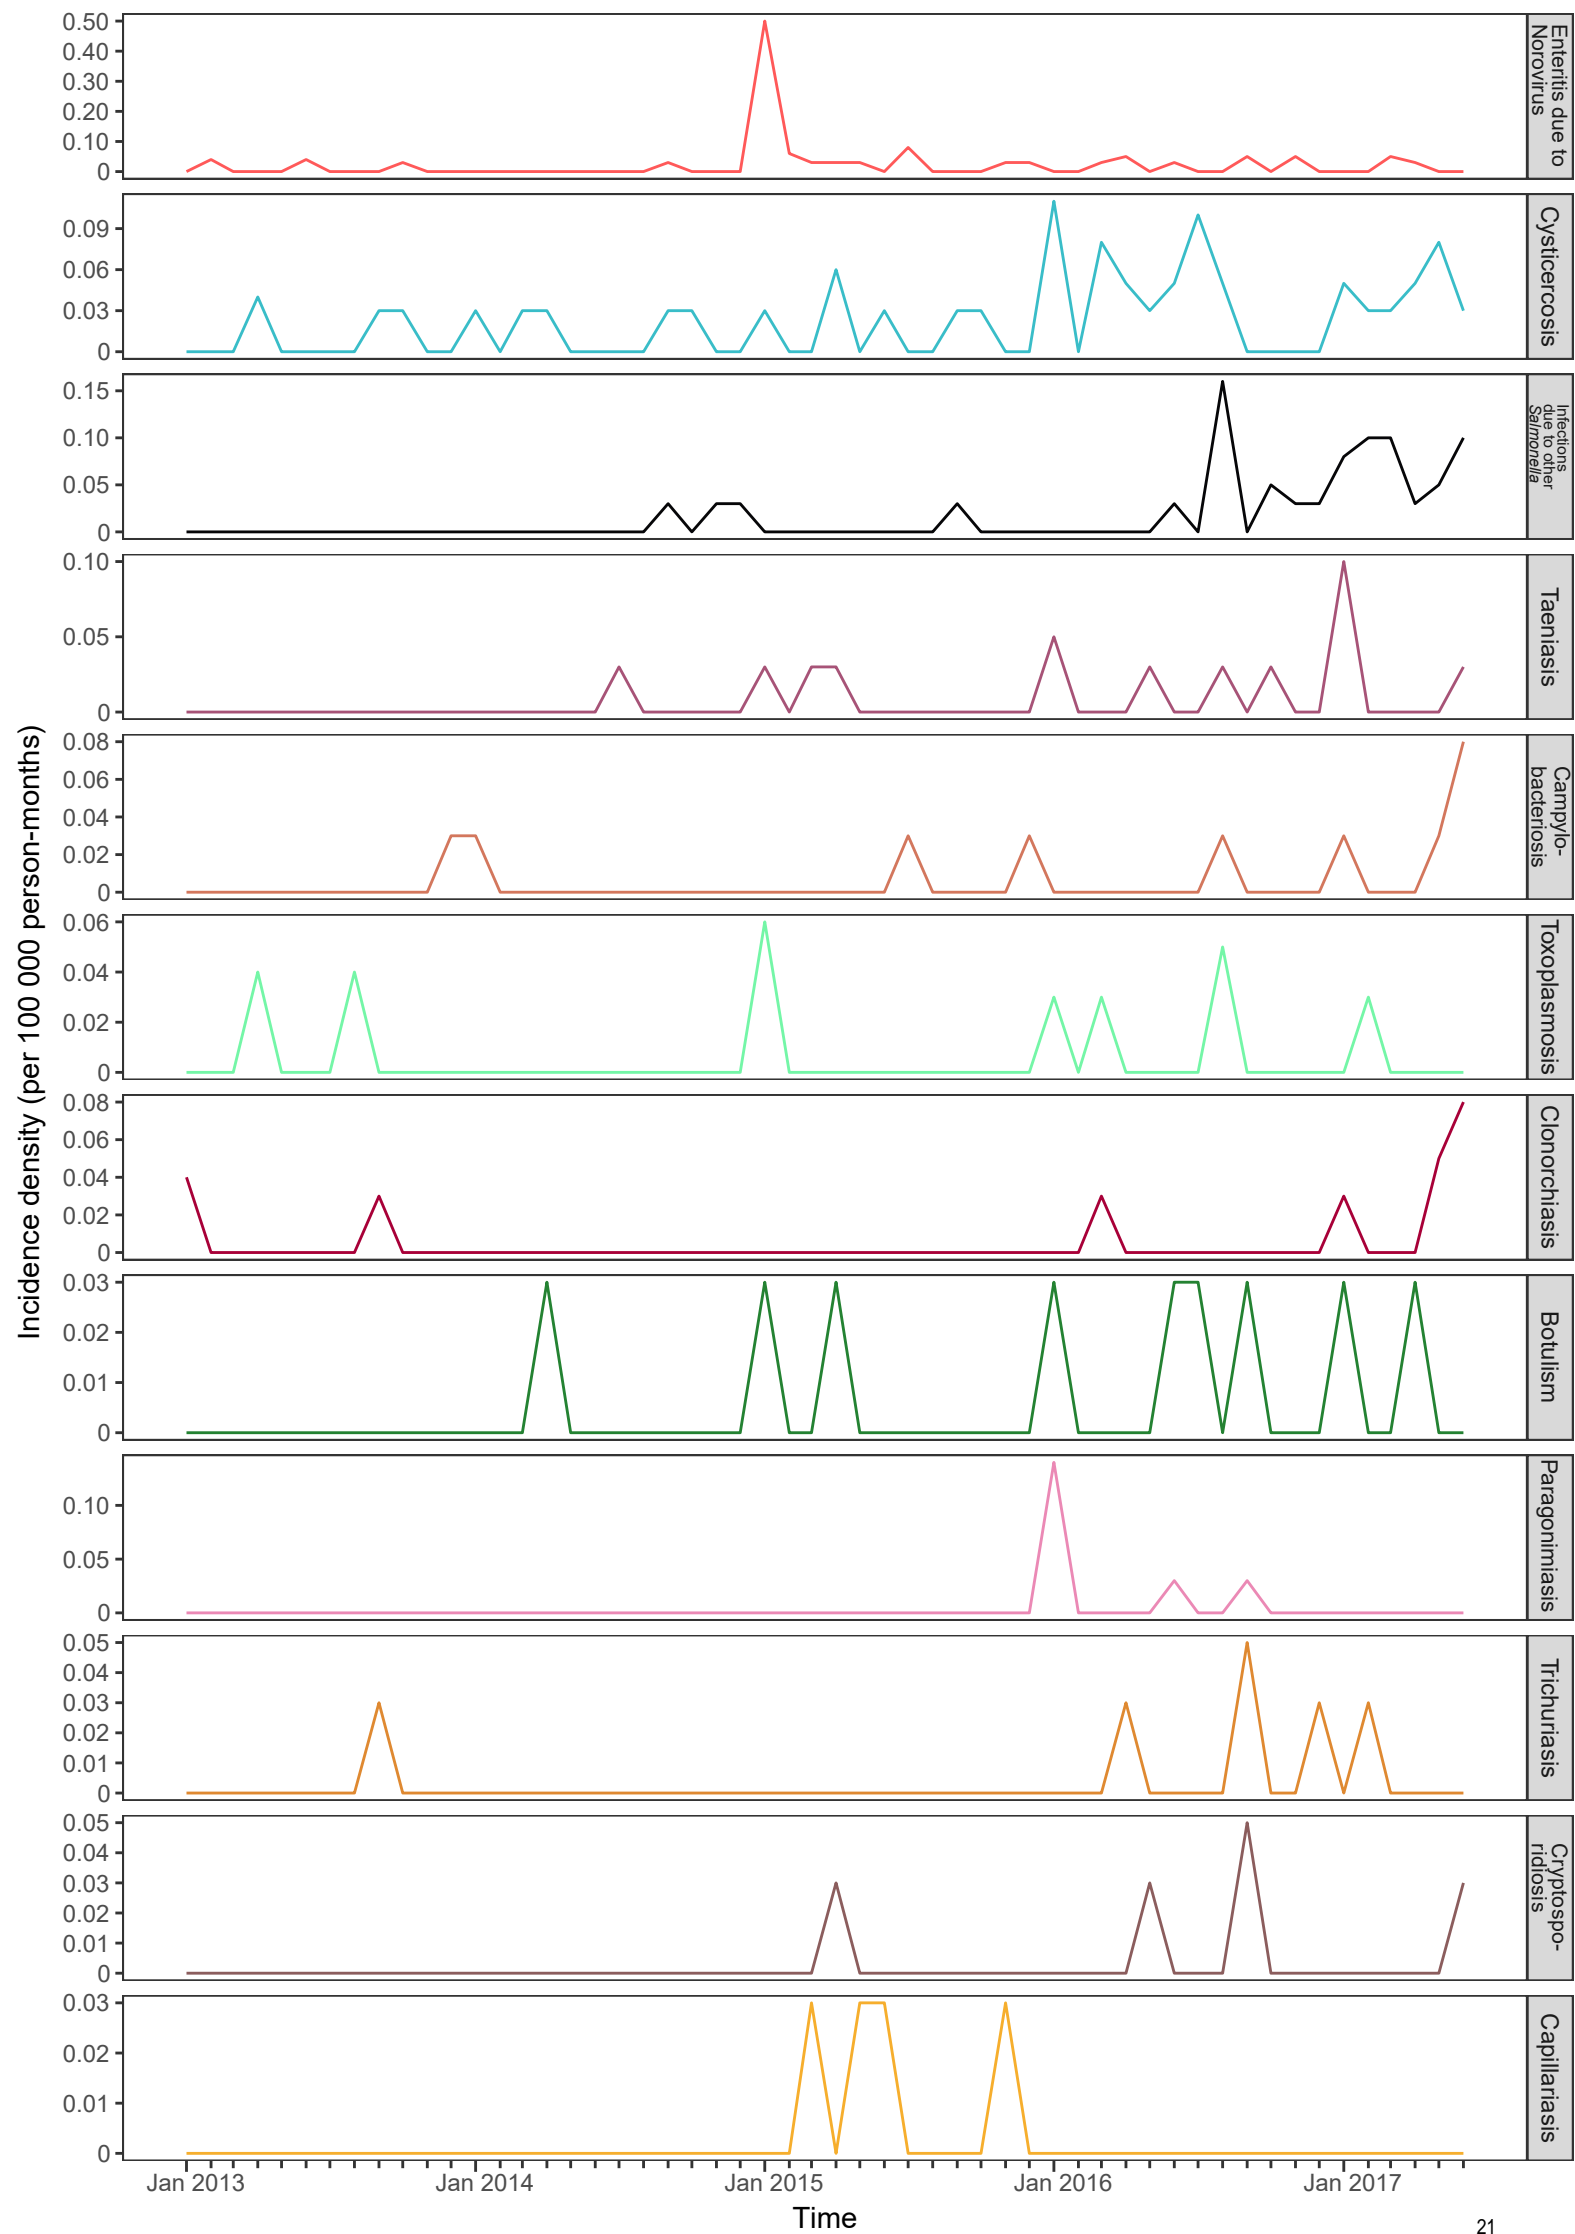

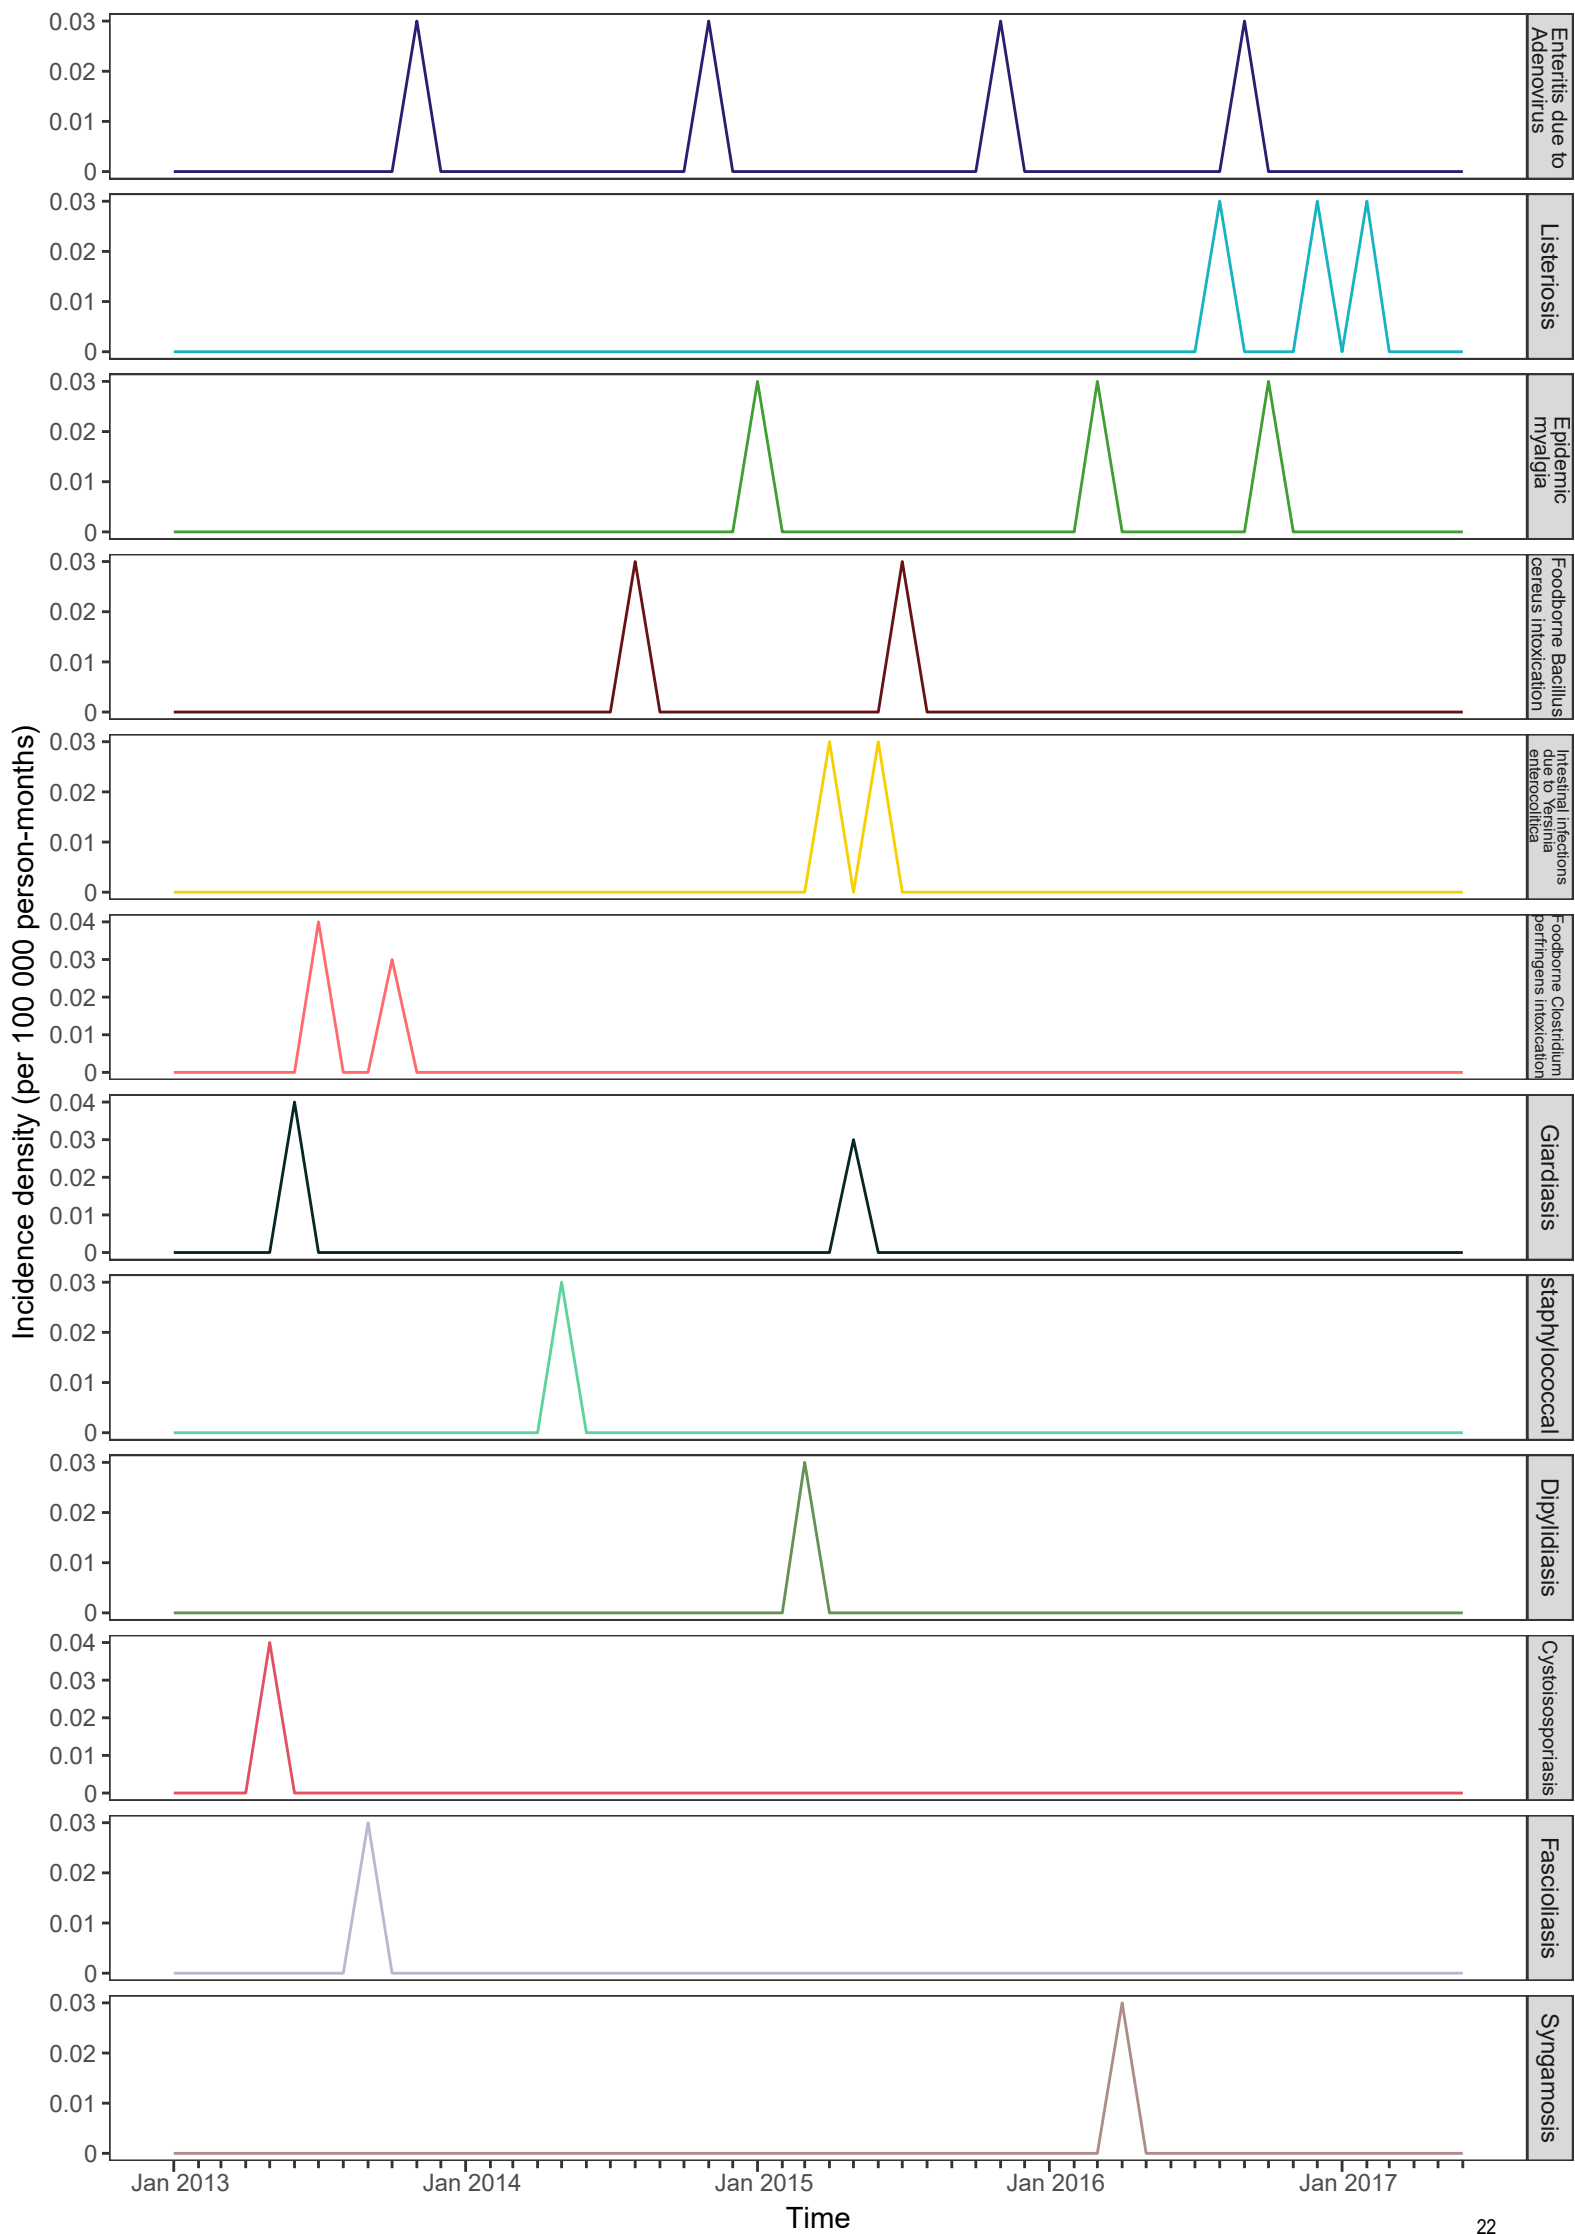

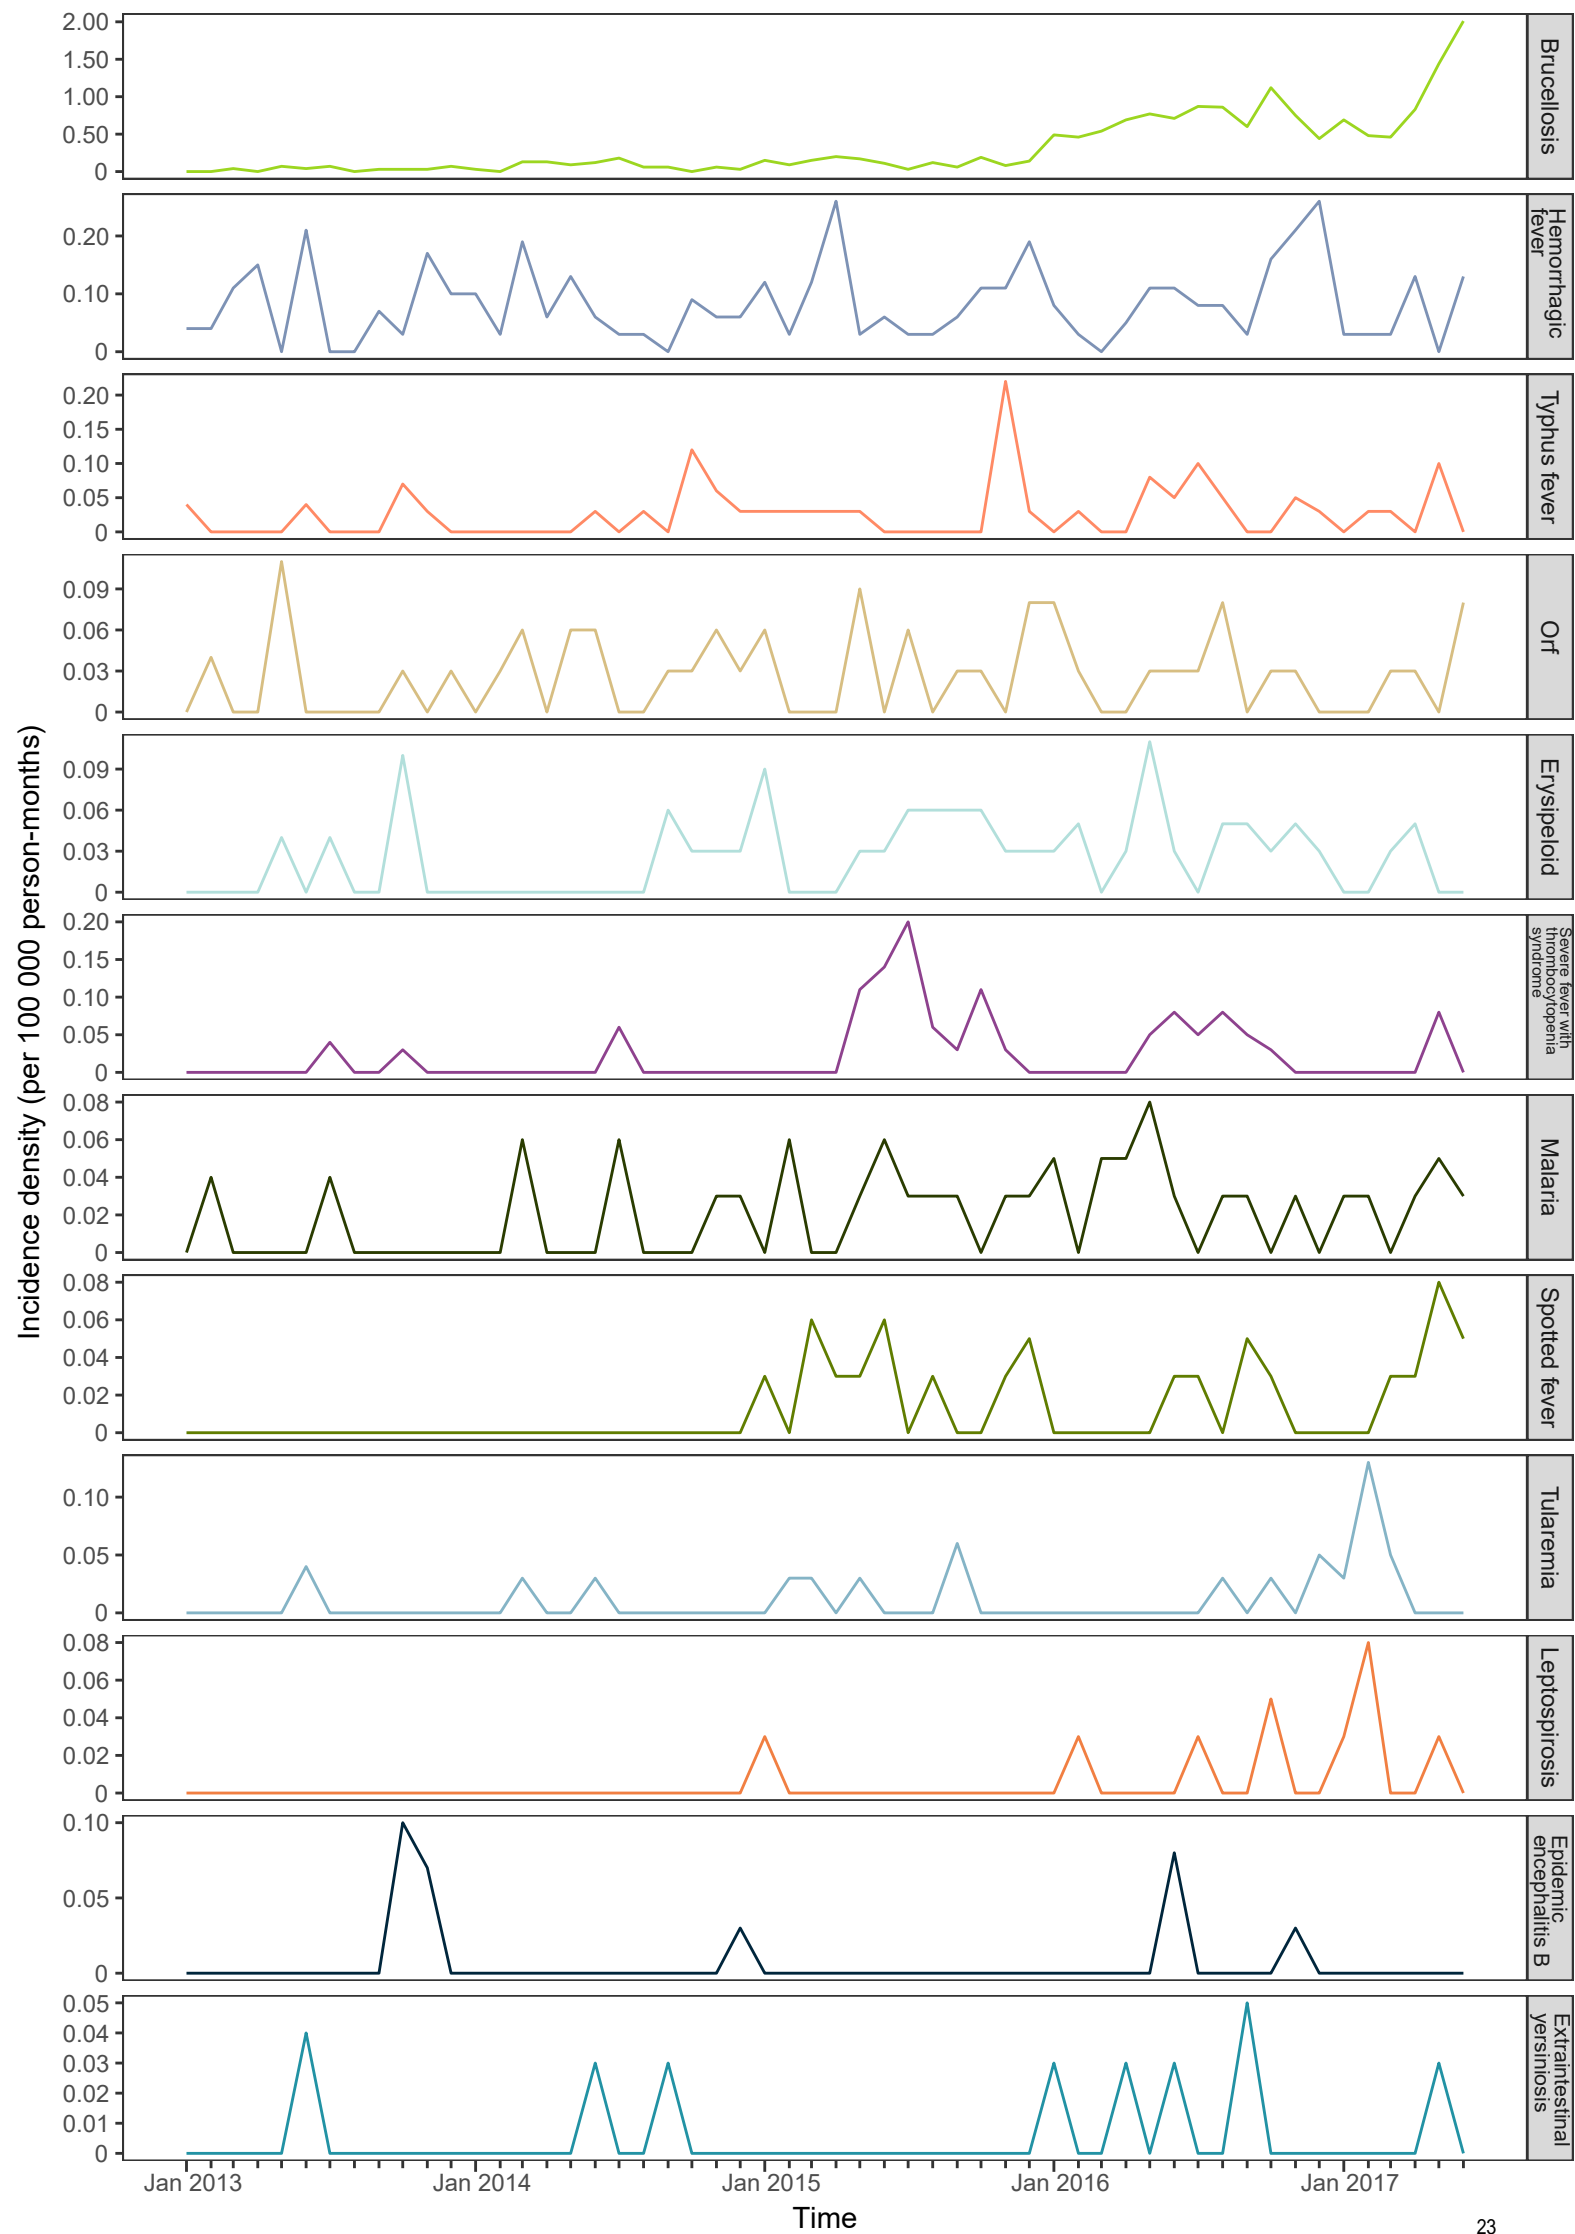



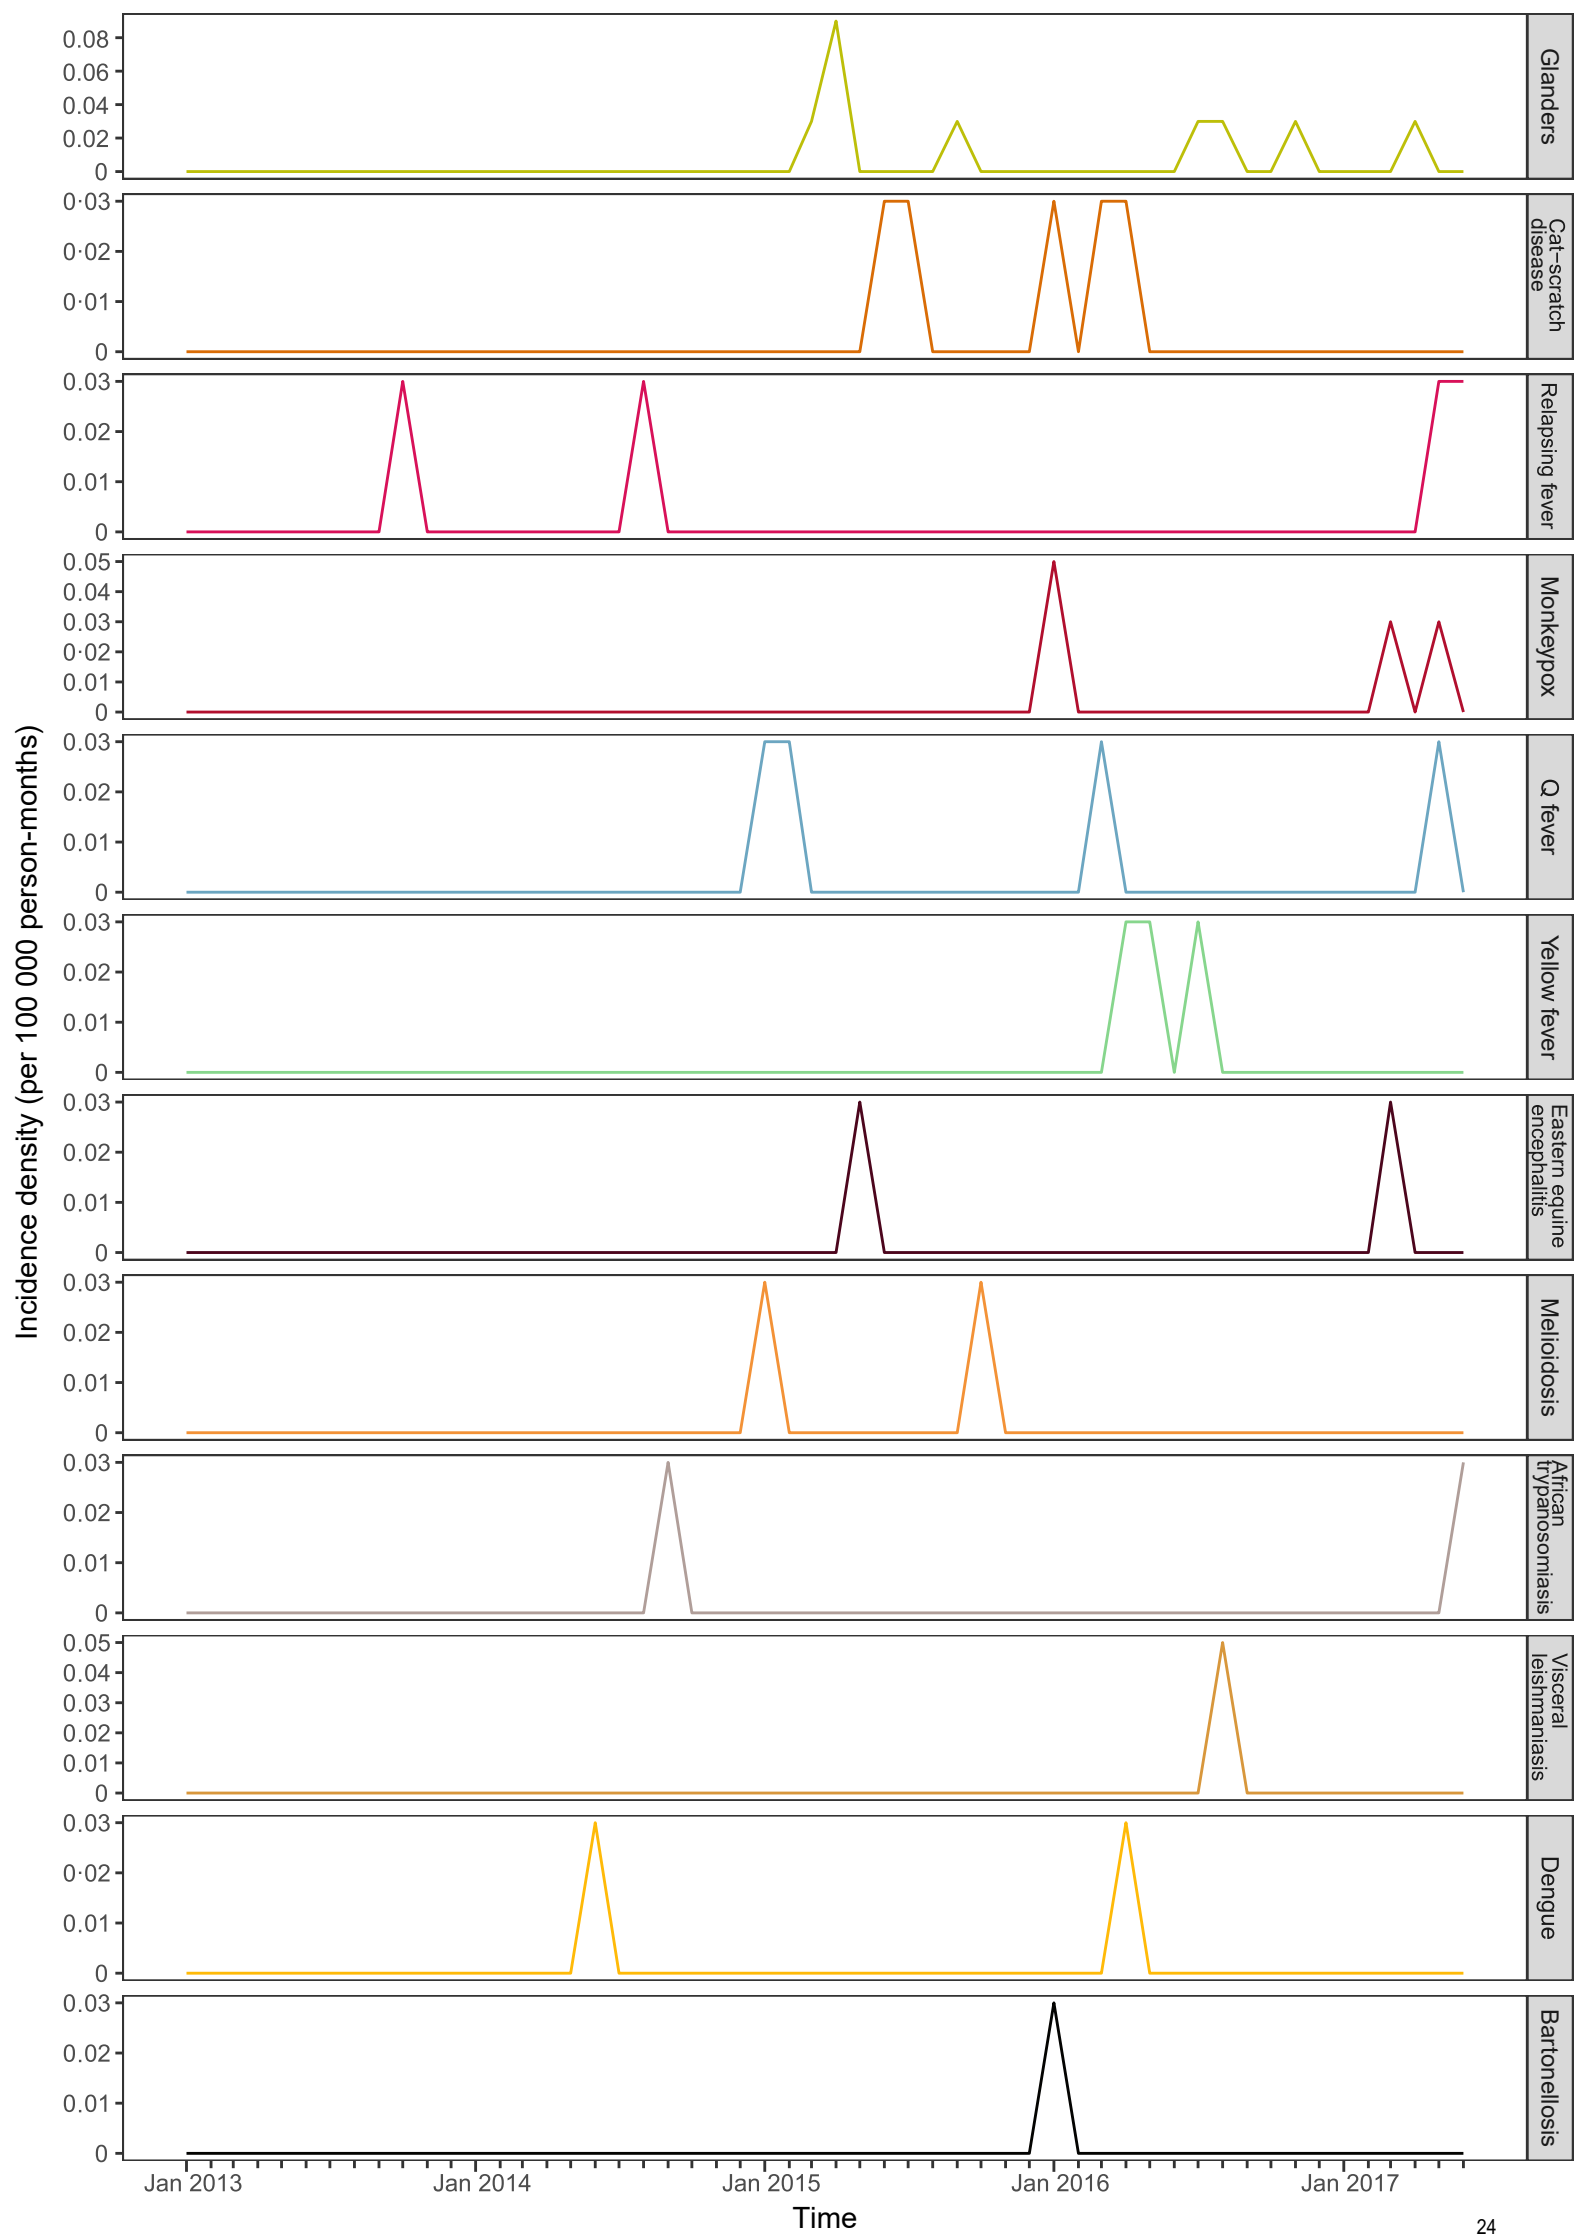

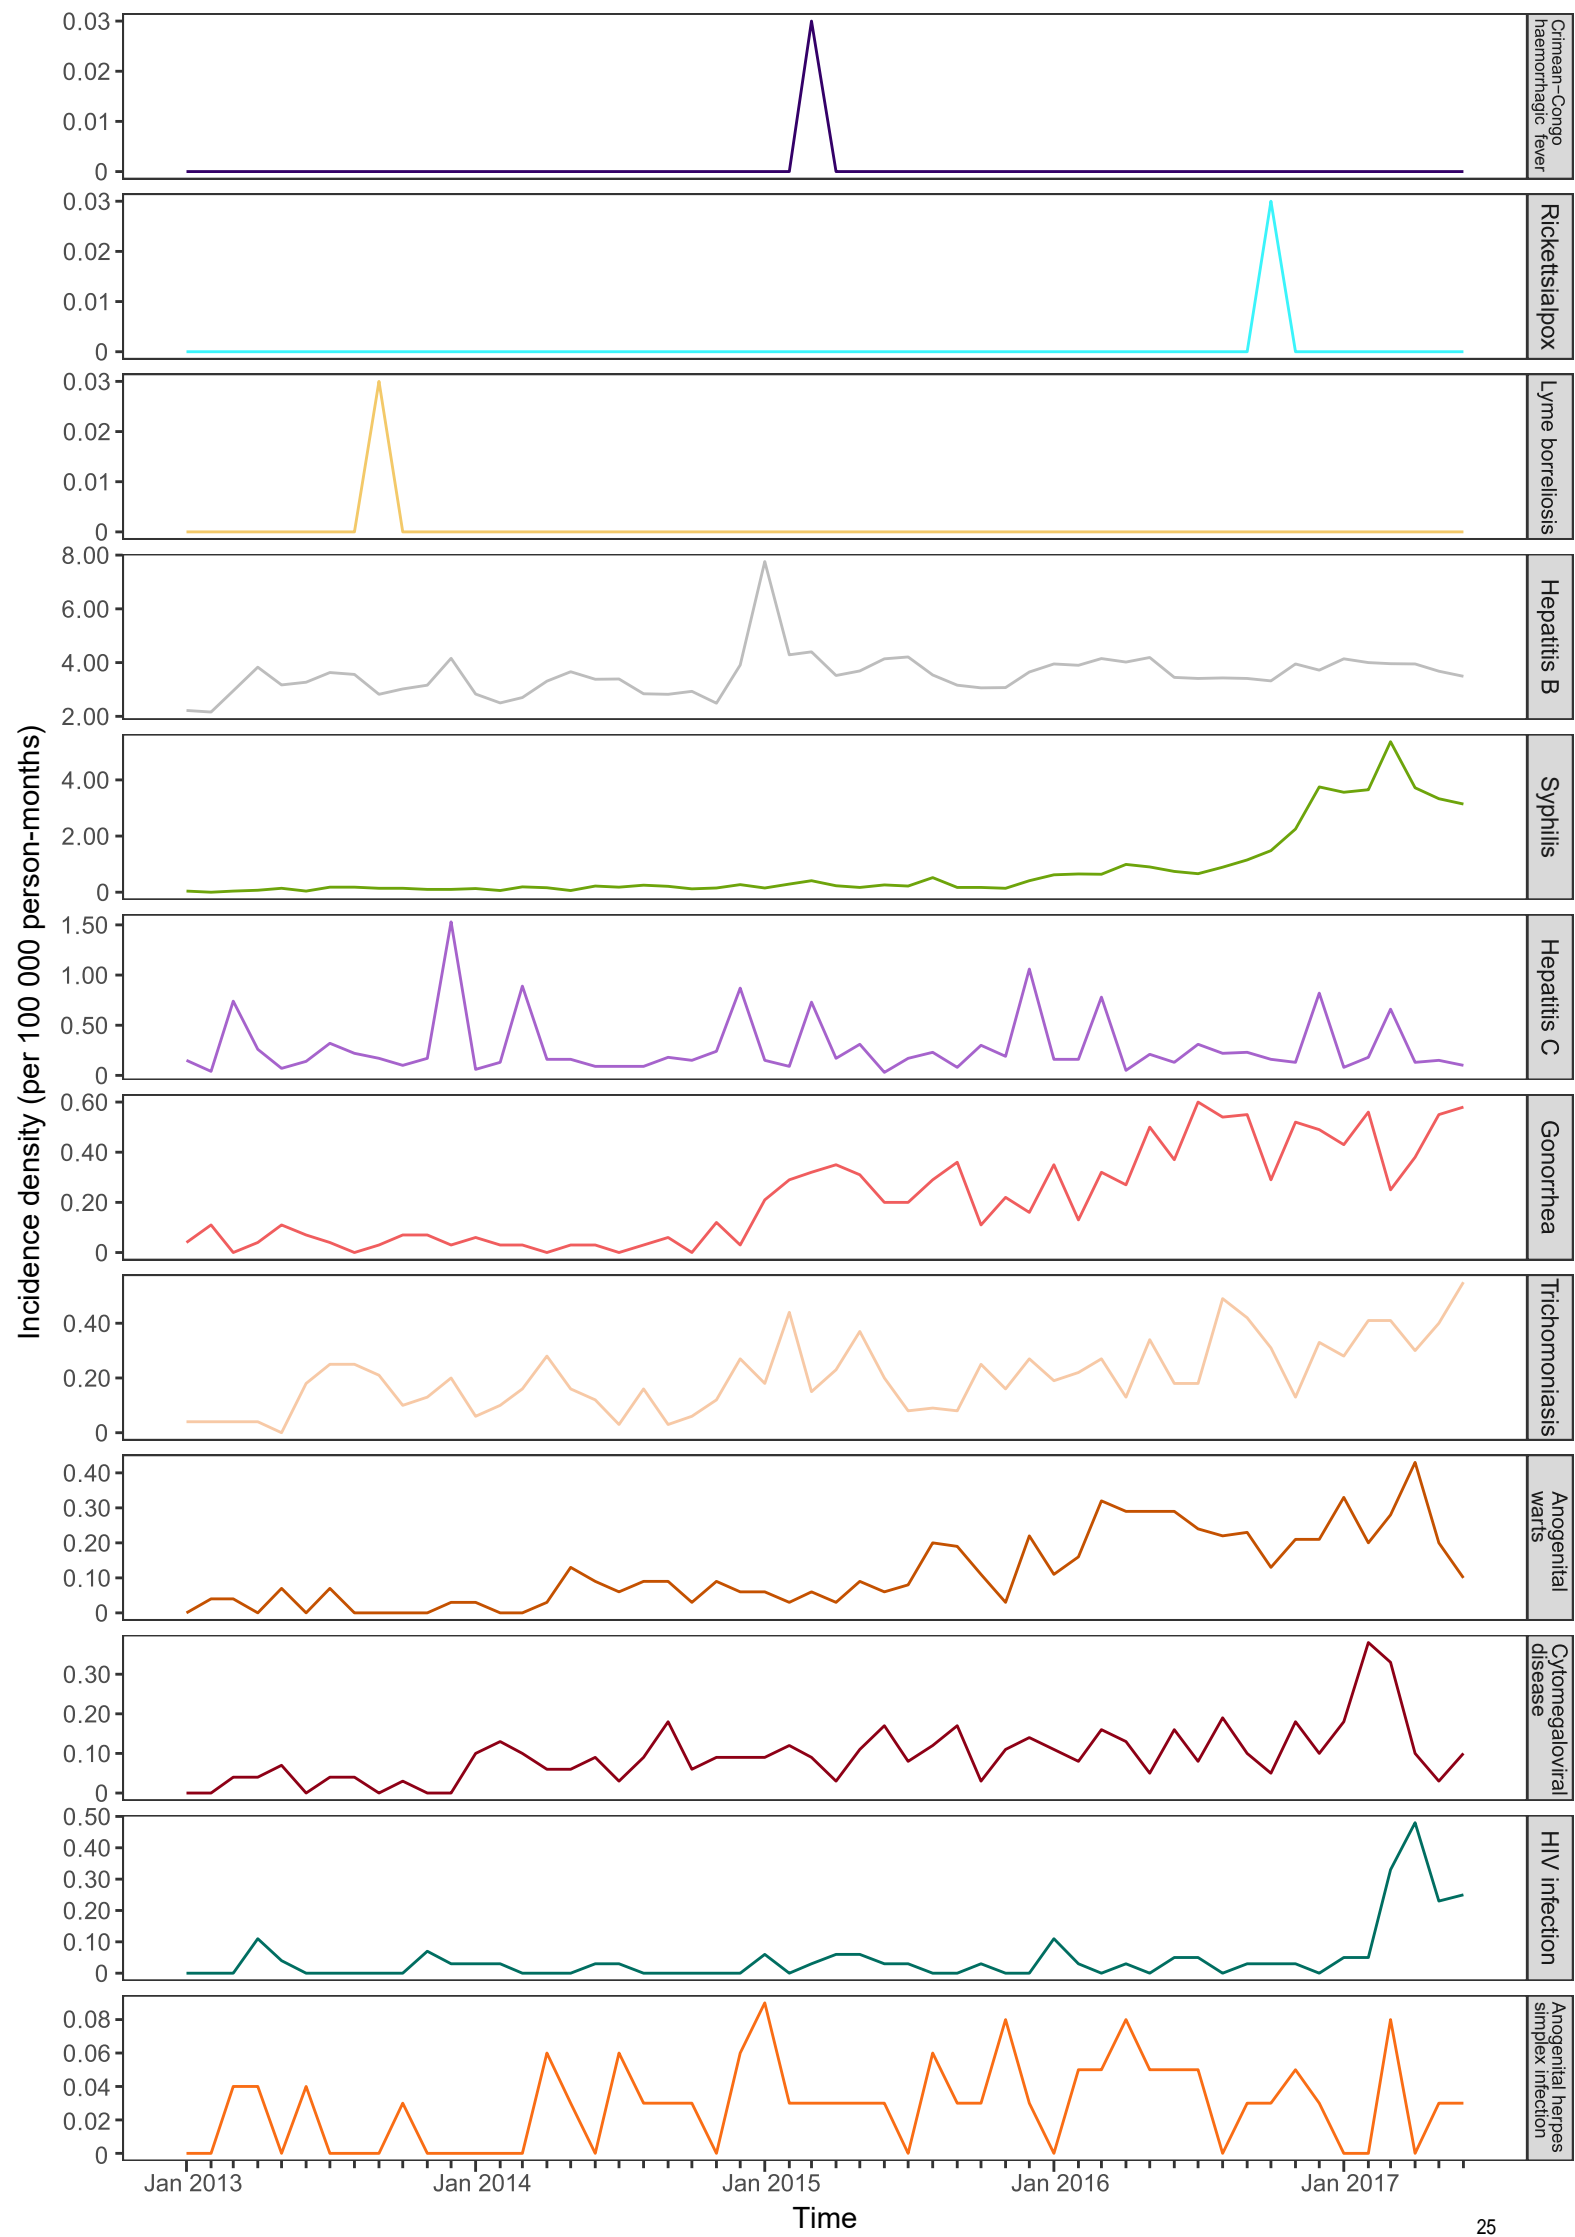

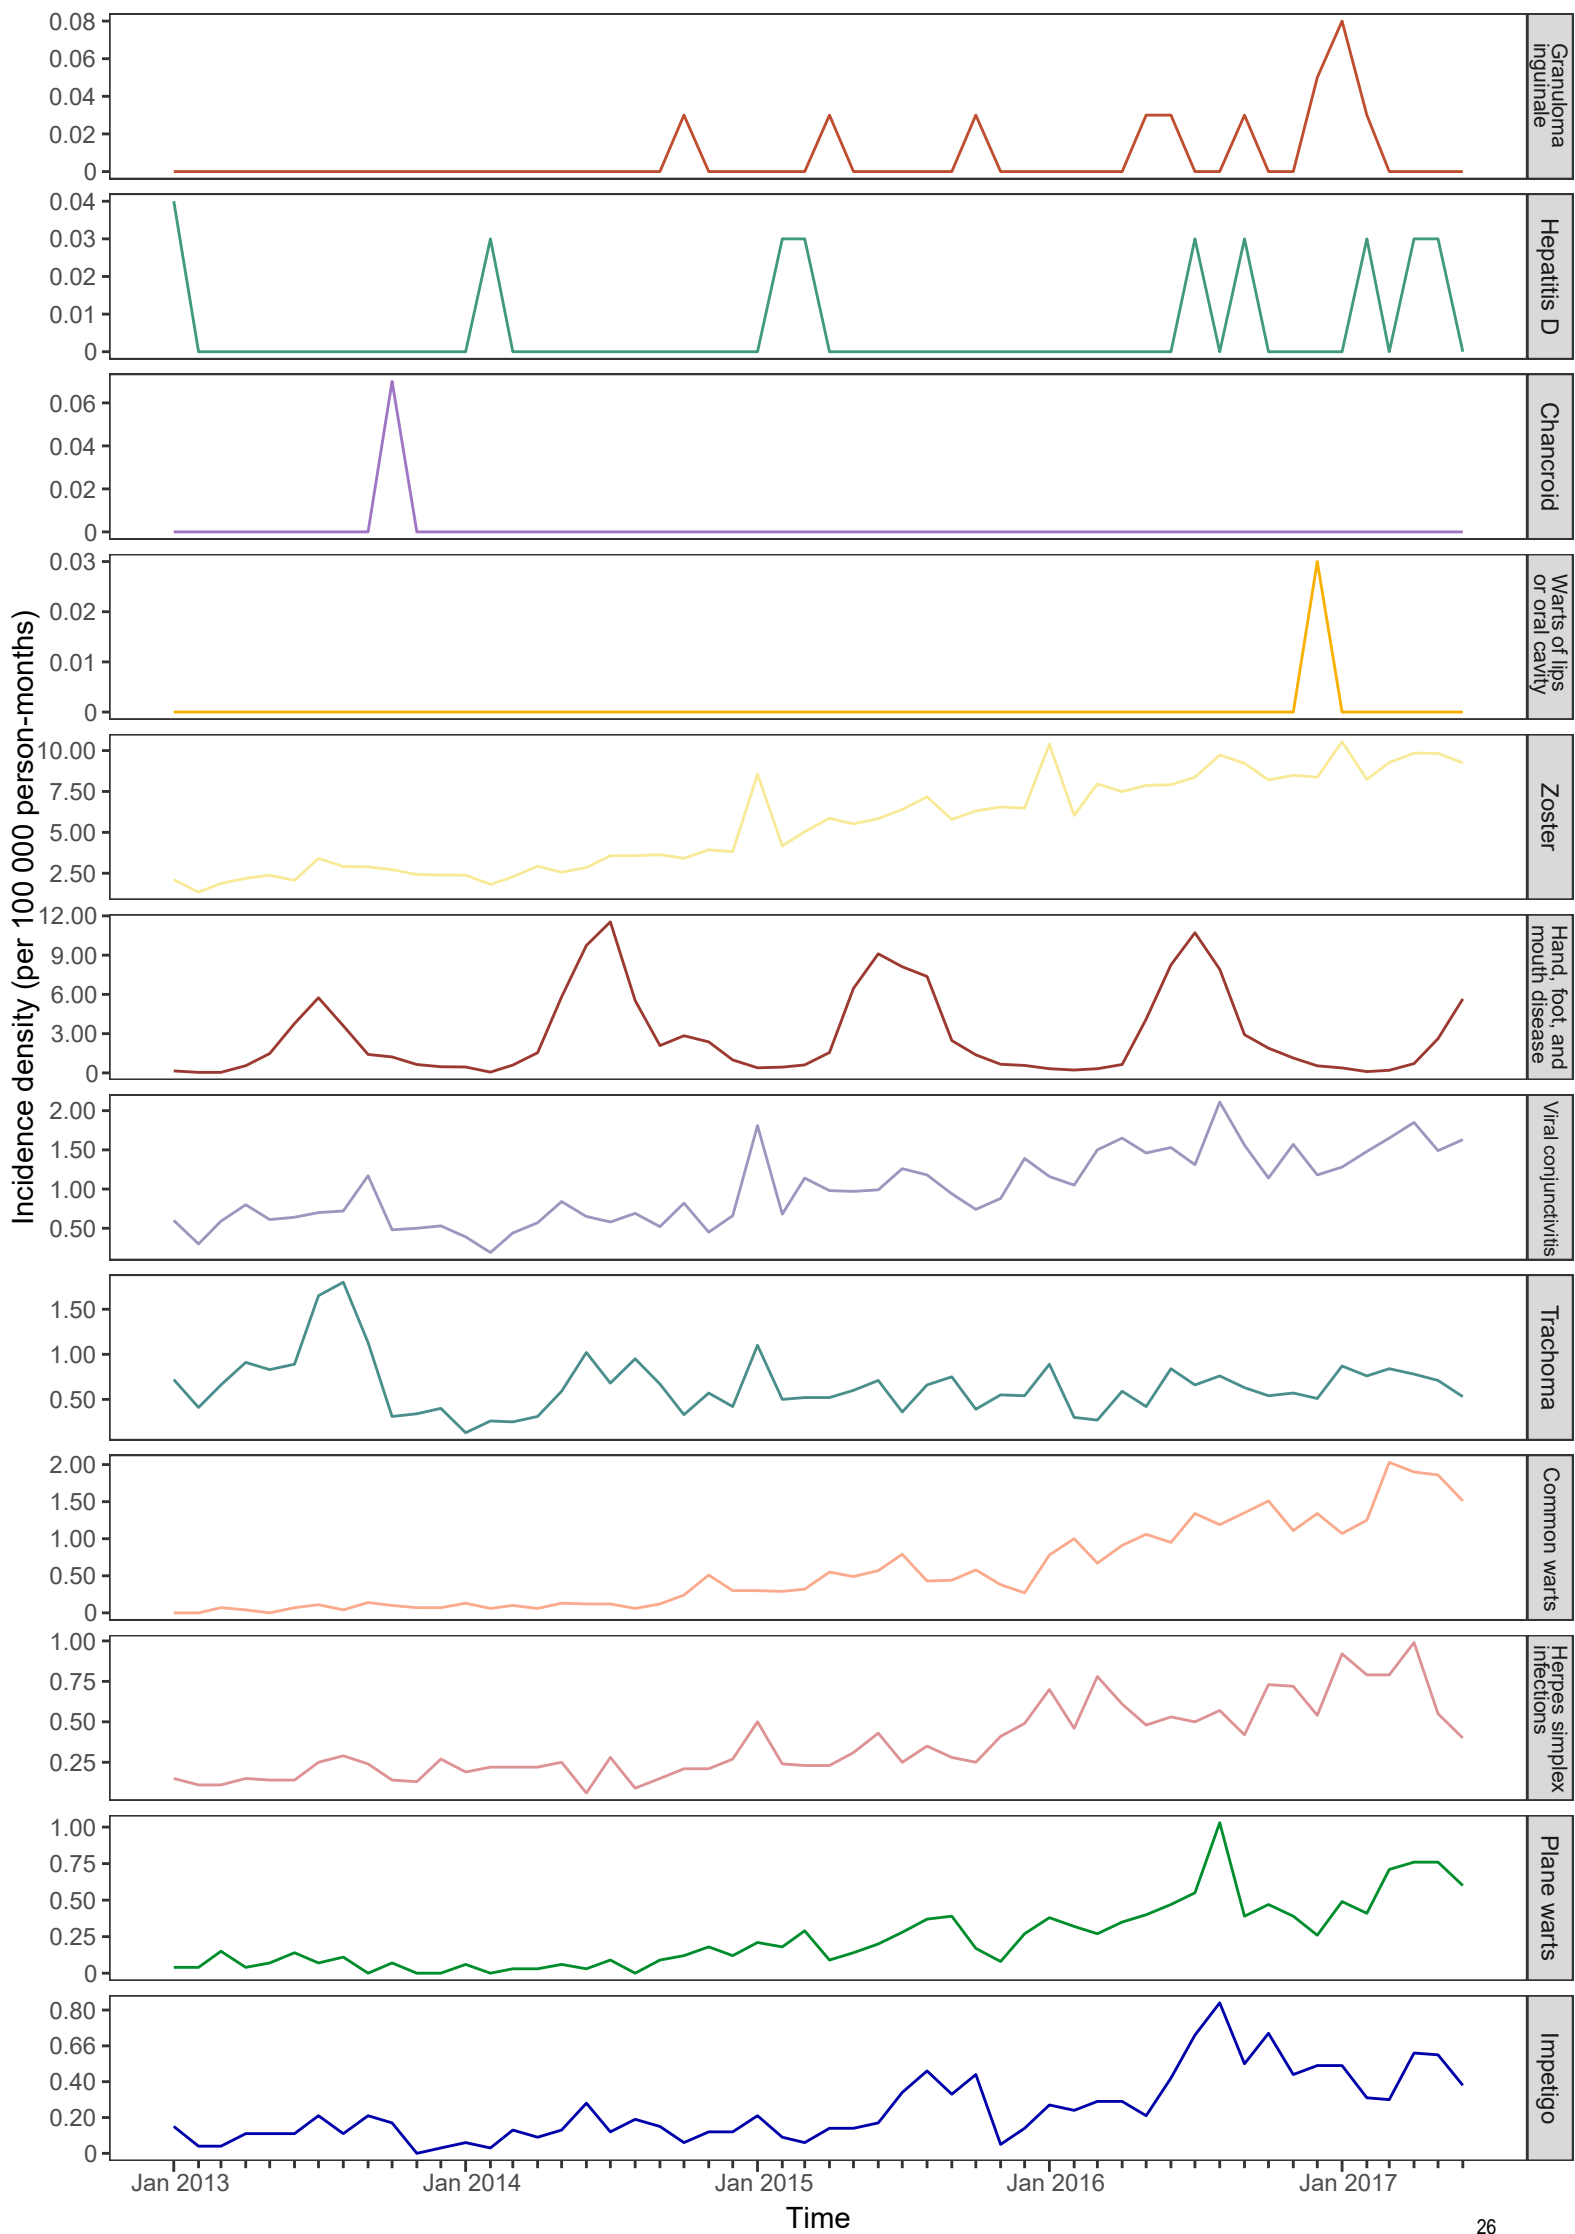

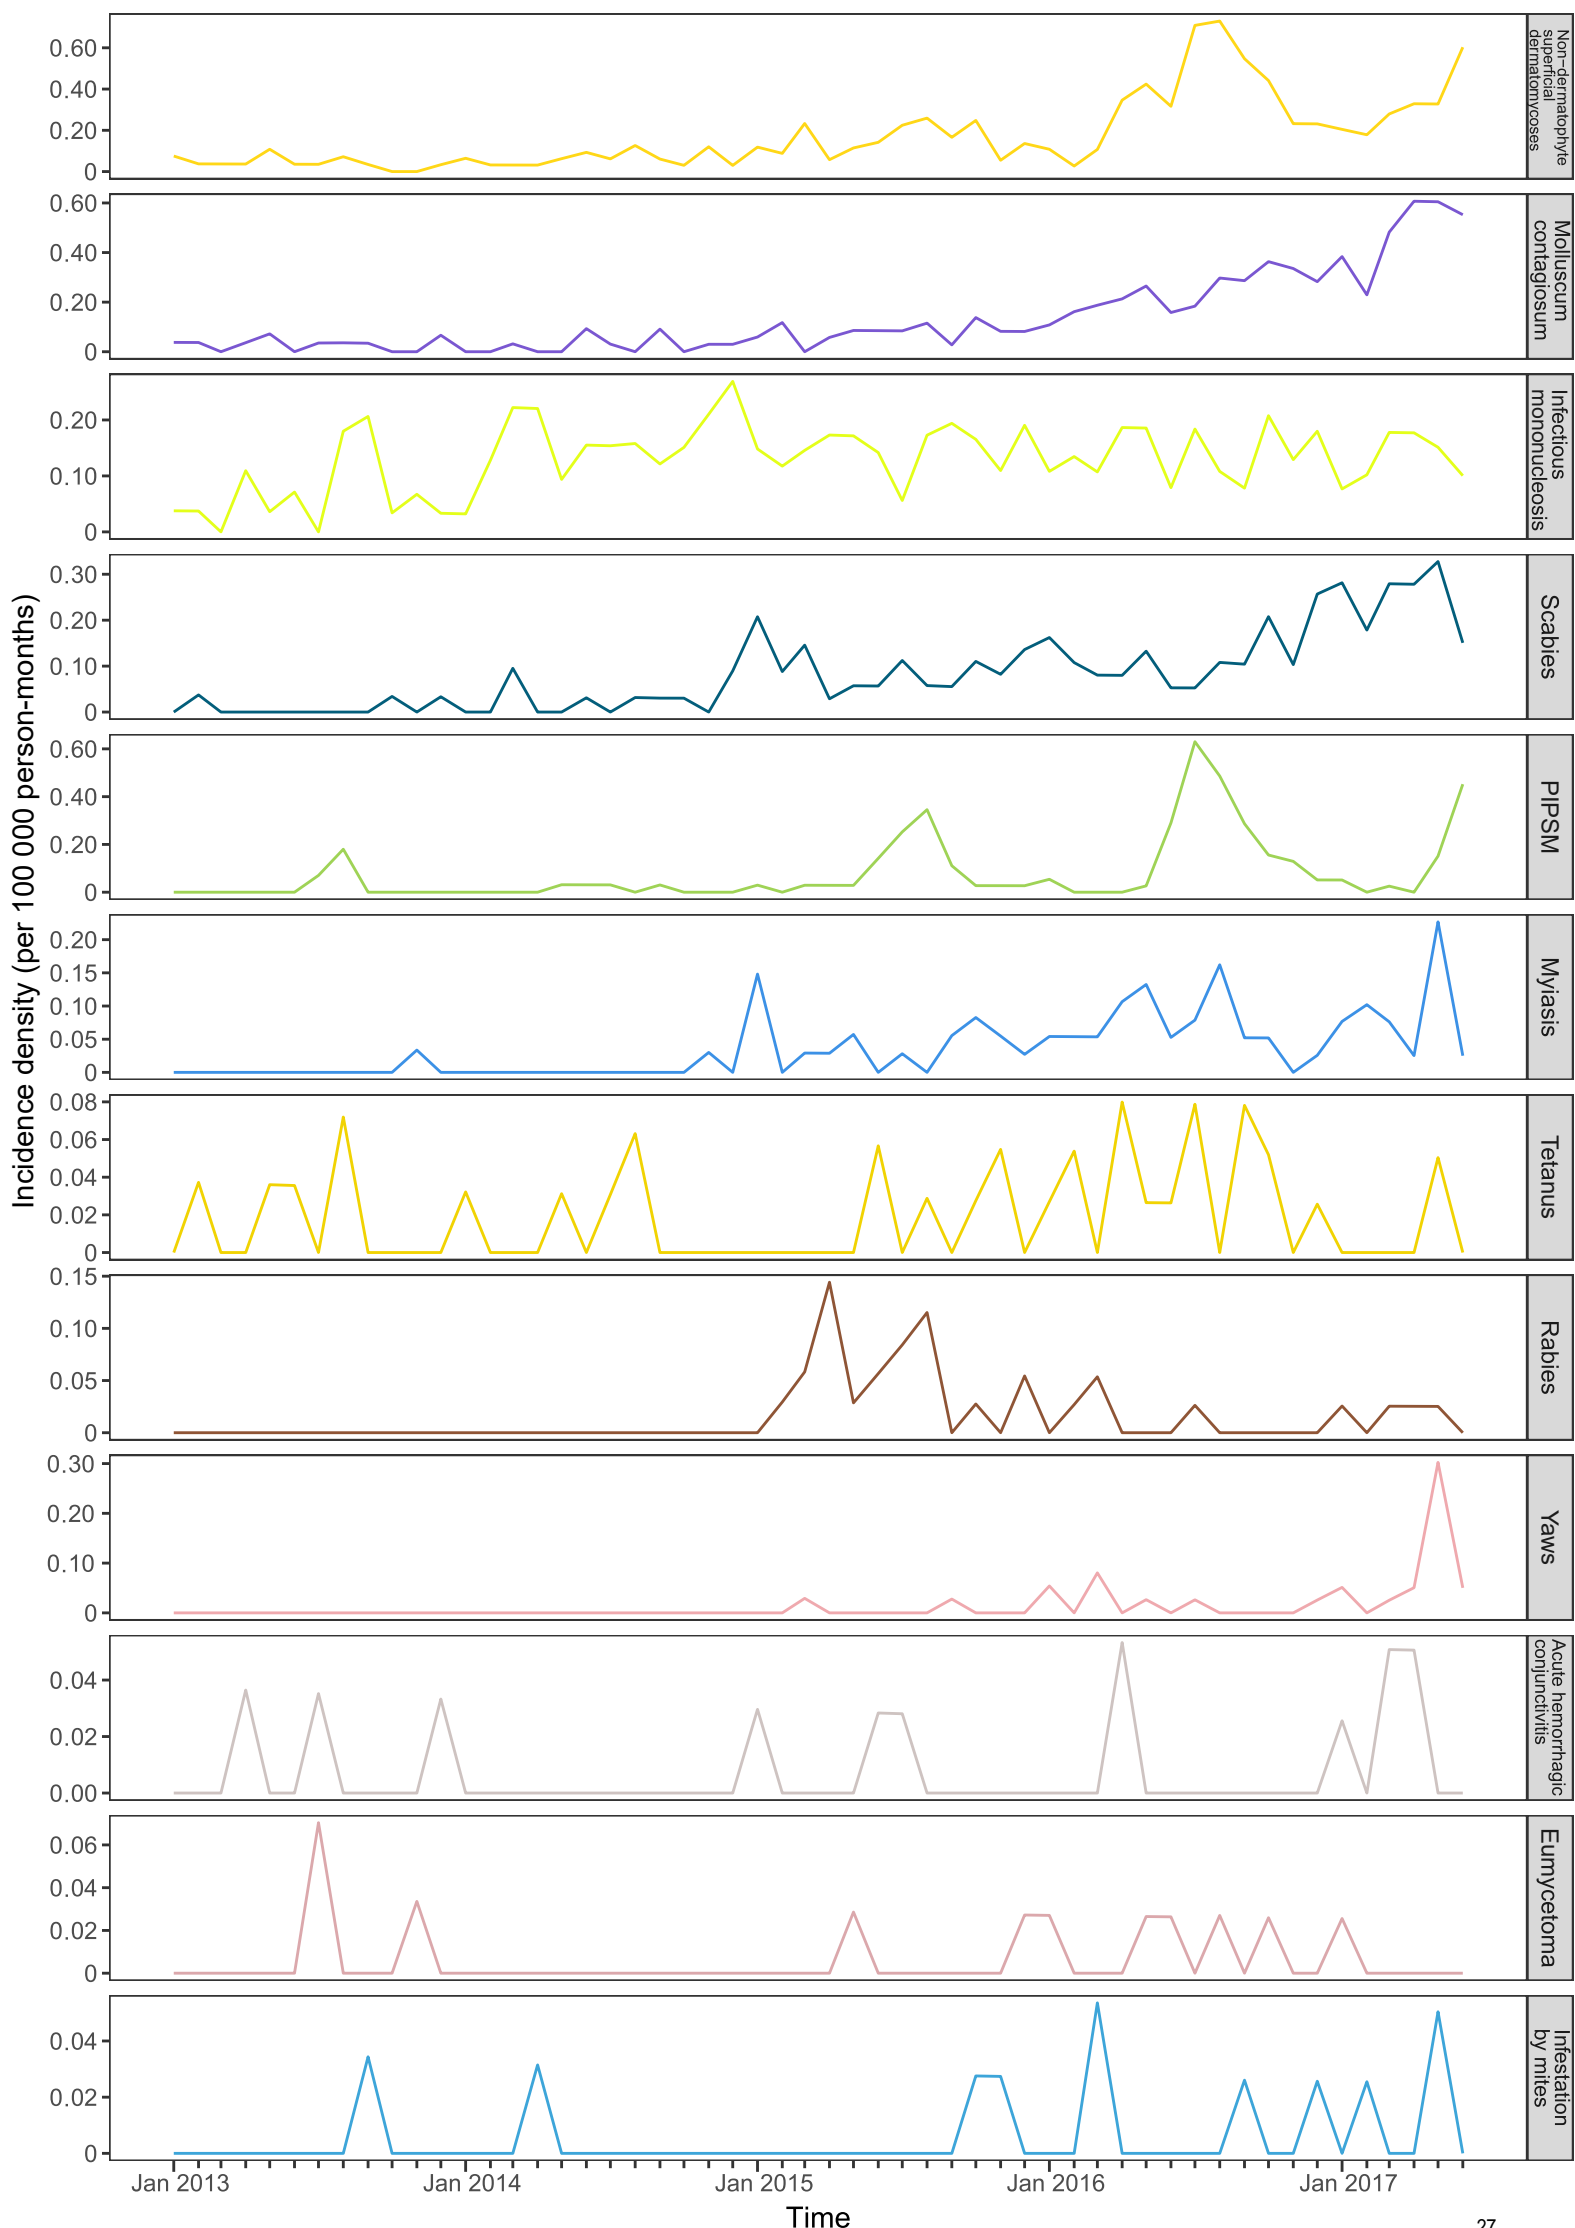

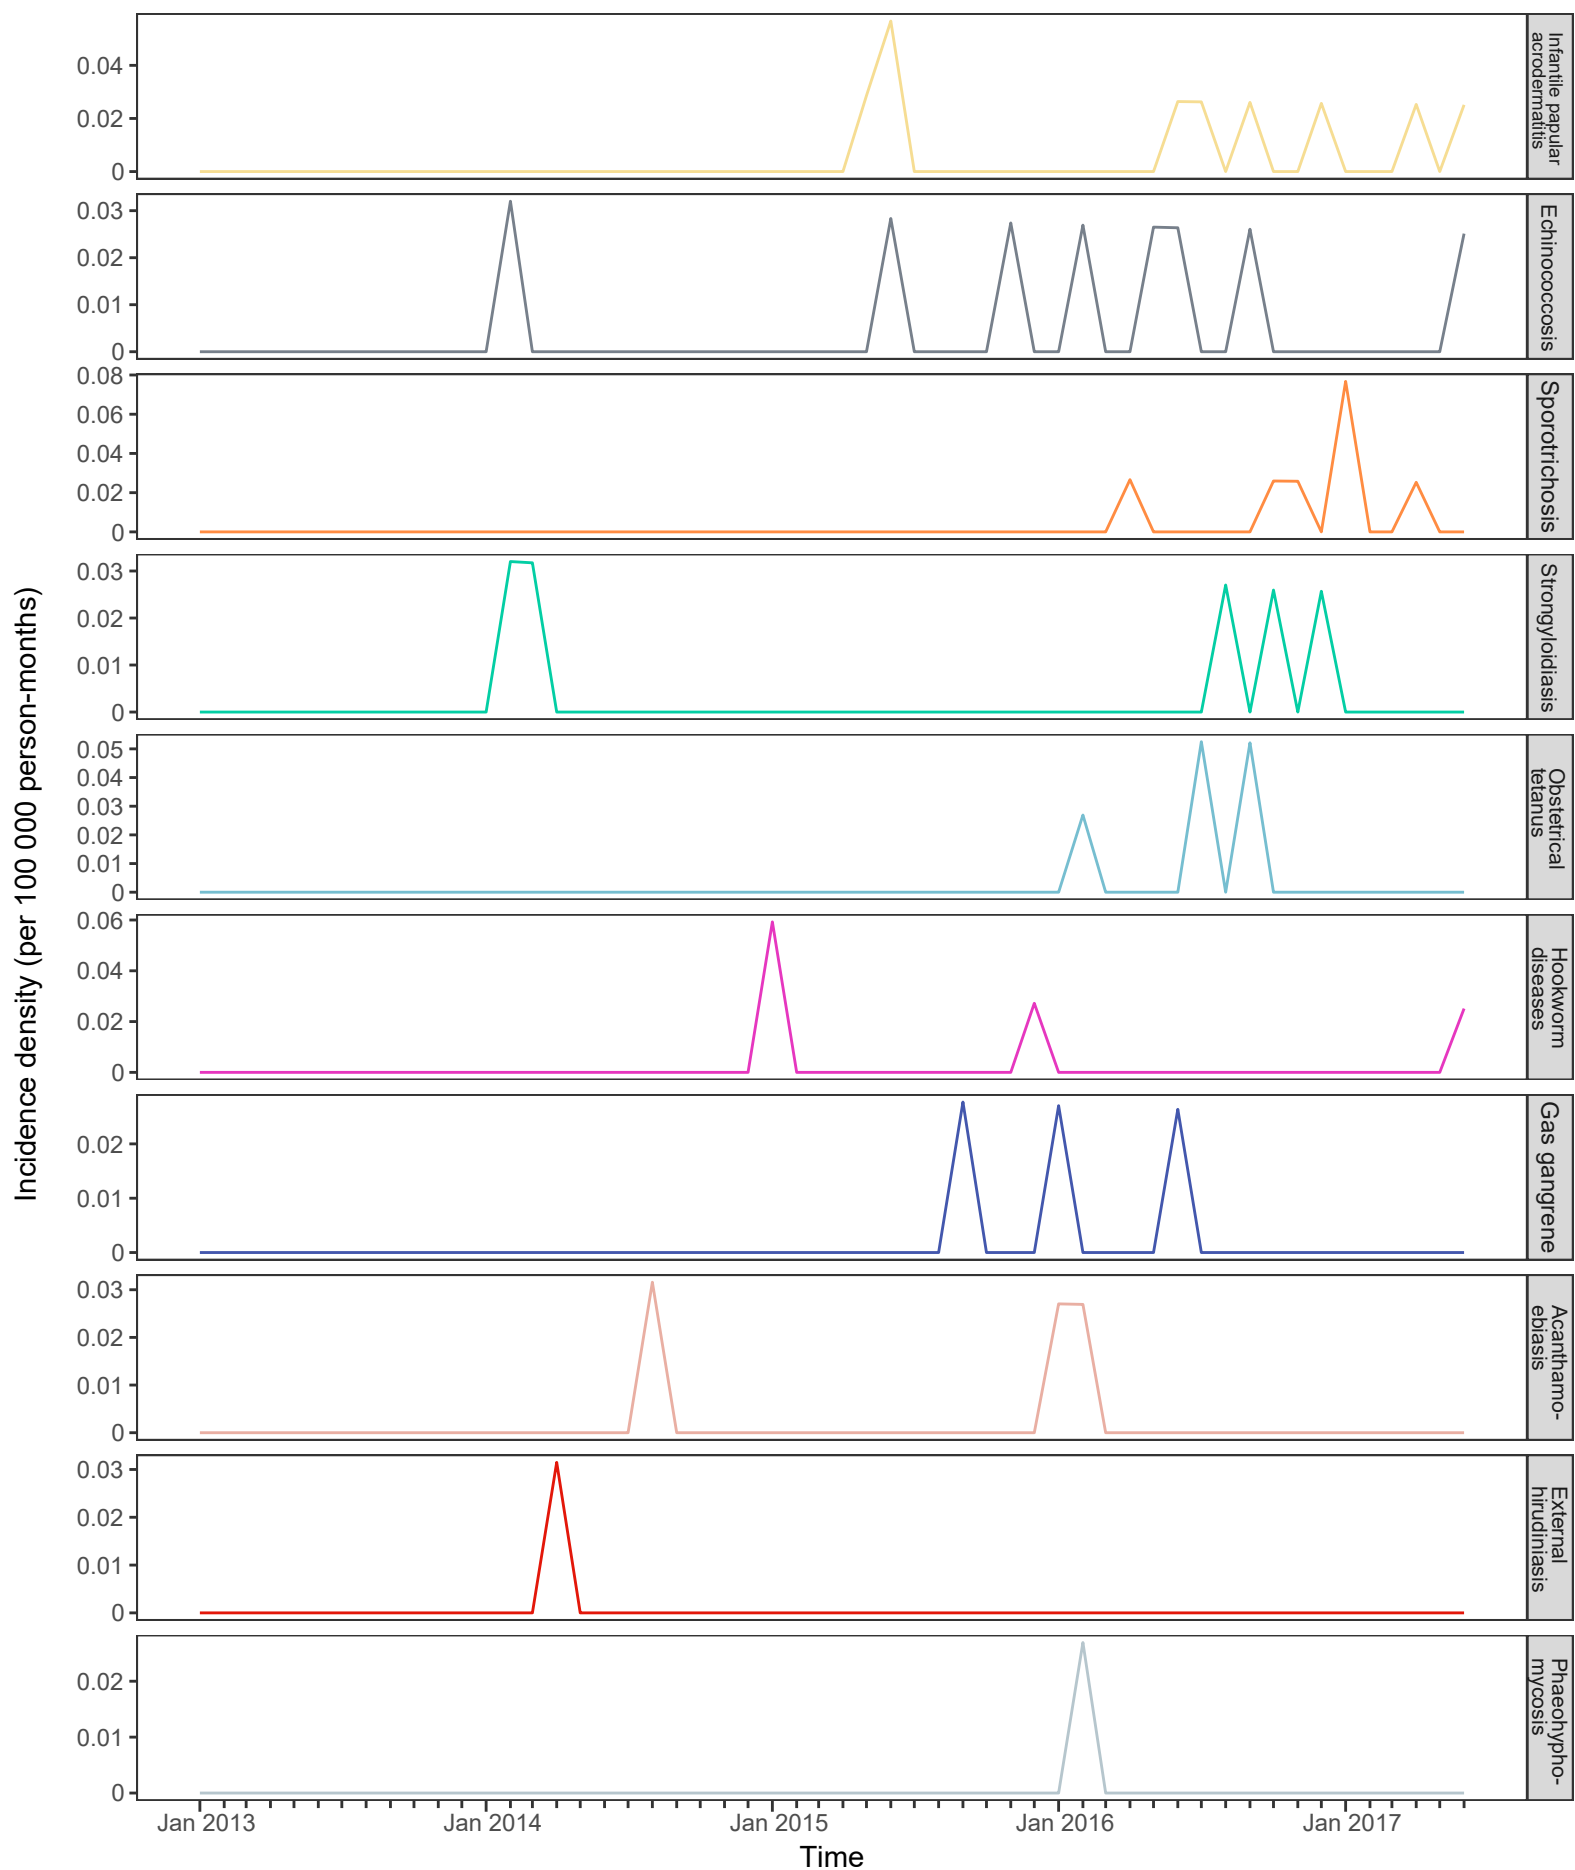

**Figure S3: Monthly incidence density of 130 infectious diseases, from January 2013 to June 2017.**

HIV=human immunodeficiency virus, PIPSM=picornavirus infections presenting in the skin or mucous membranes.

**Influenza**

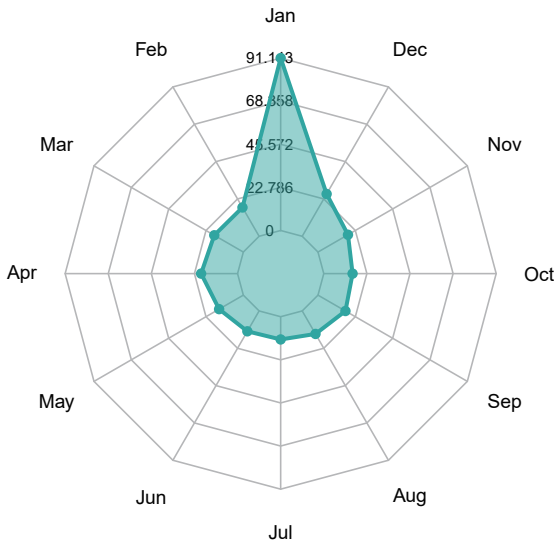

**Pneumonia**

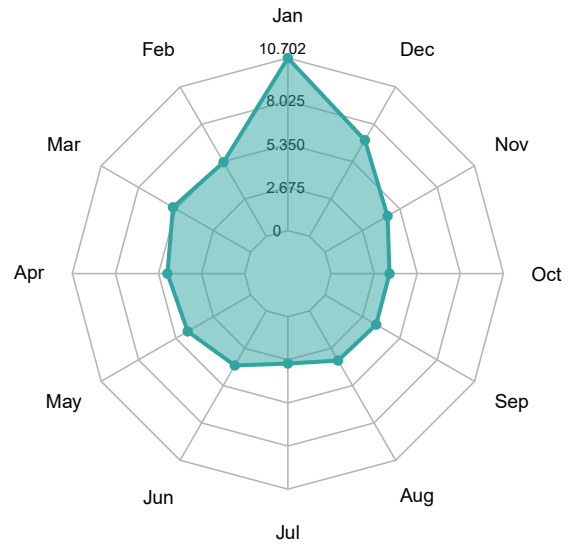

**Pulmonary tuberculosis**

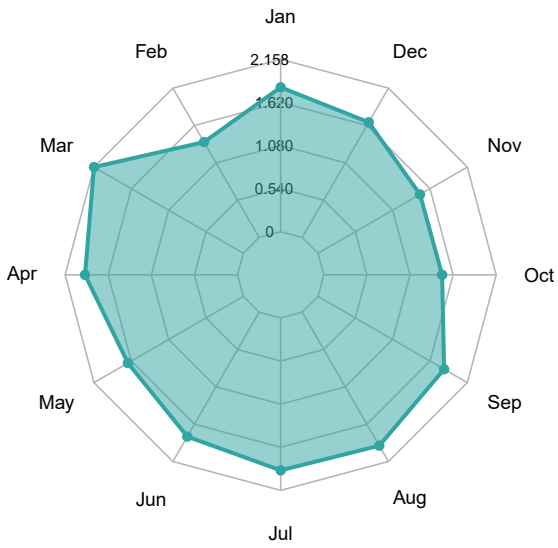

**Varicella**

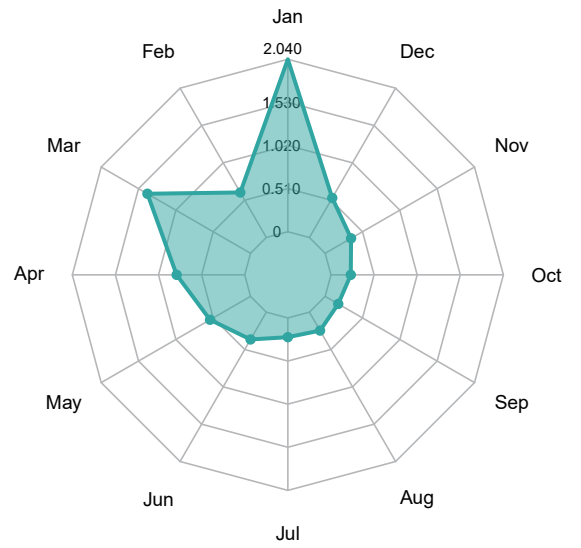

**Scarlet fever**

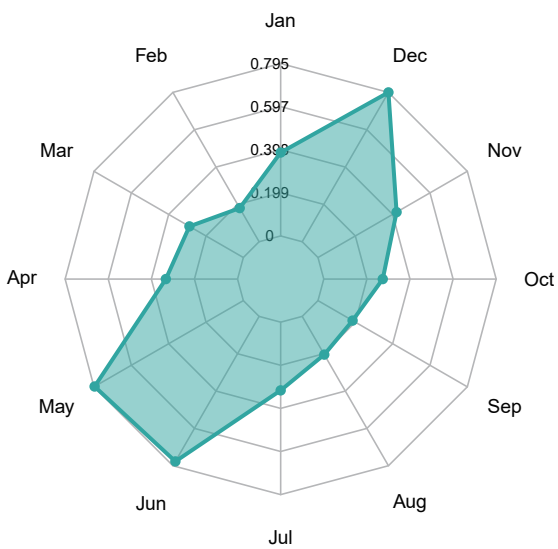

**Mumps**

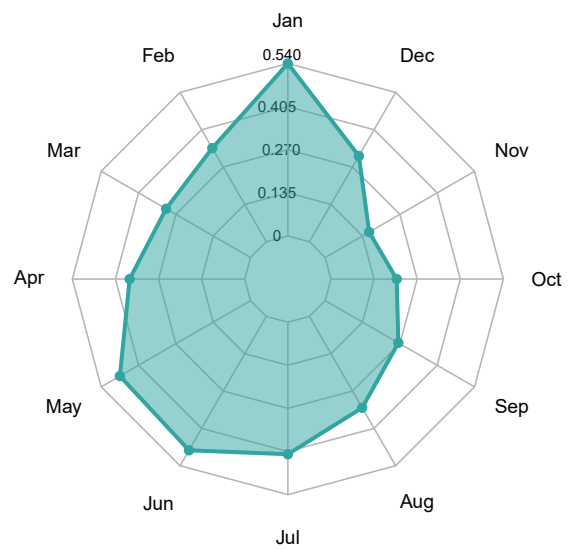

**Measles**

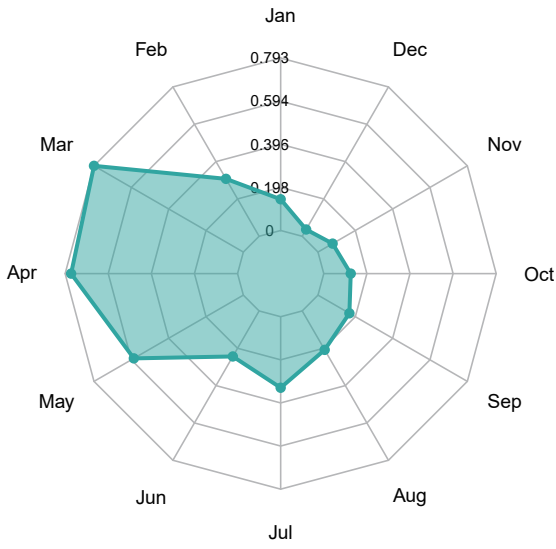

**Cryptococcosis**

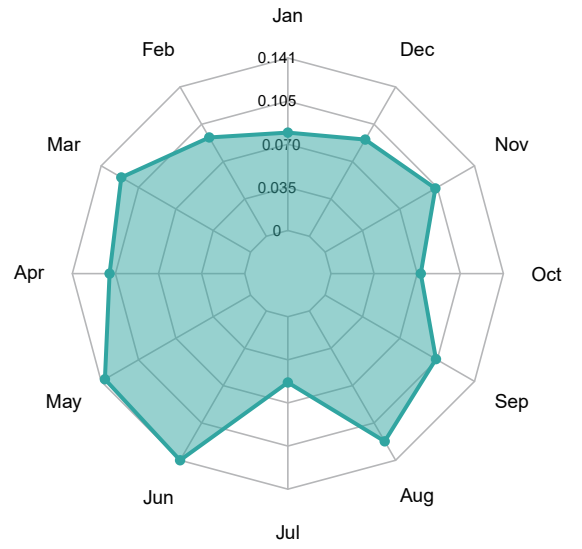

**Rubella**

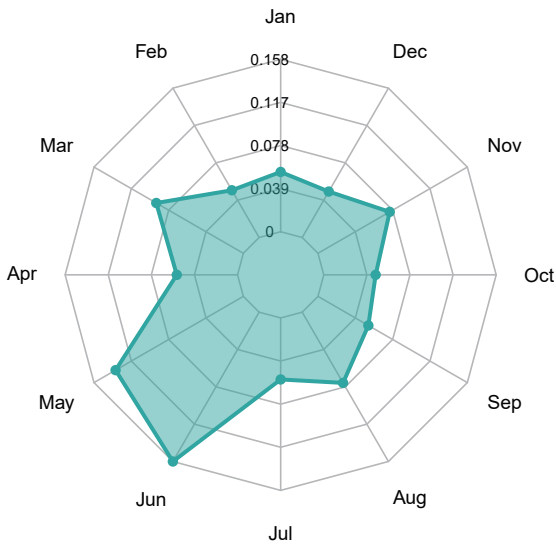

**Whooping cough**

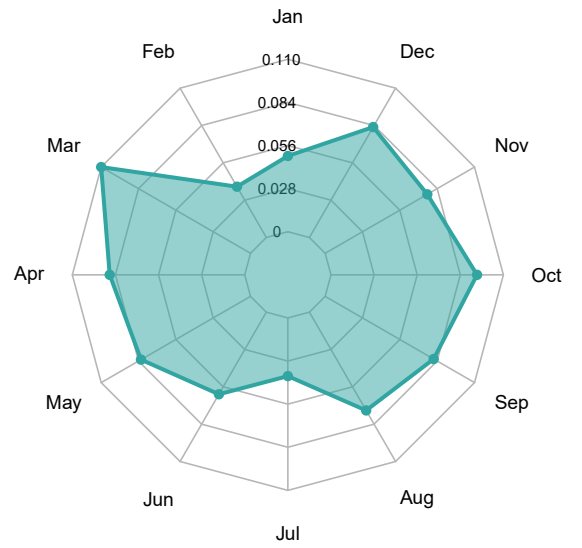

**Aspergillosis**

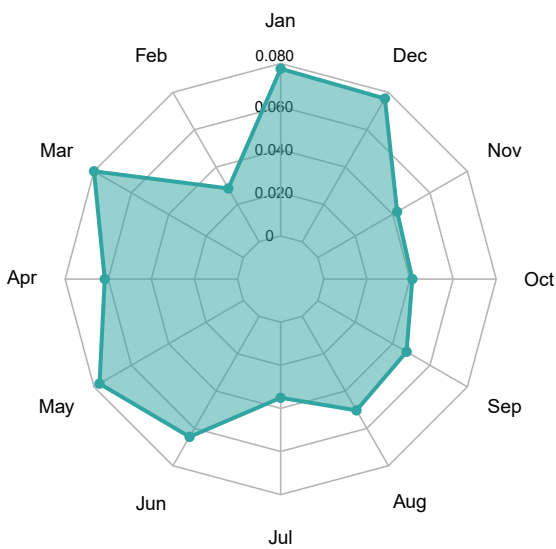

**Roseola infantum**

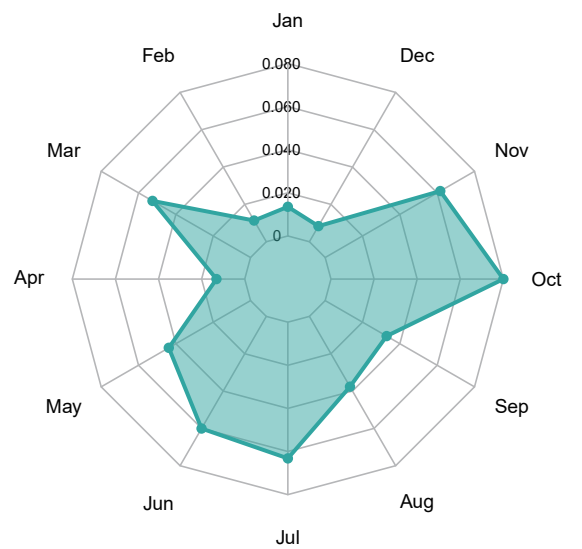

**Influenza A H1N1**

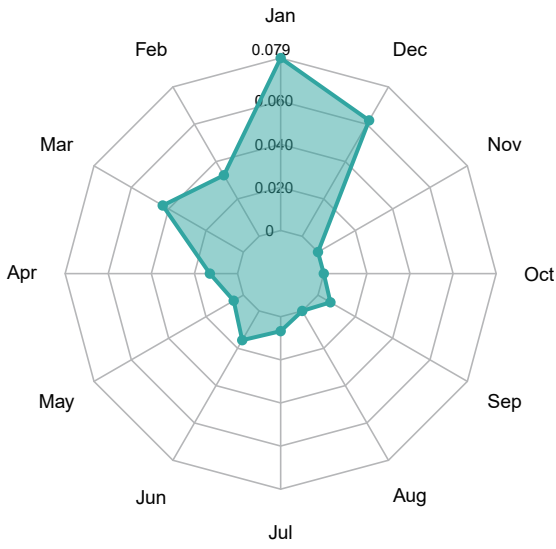

**Blastomycosis**

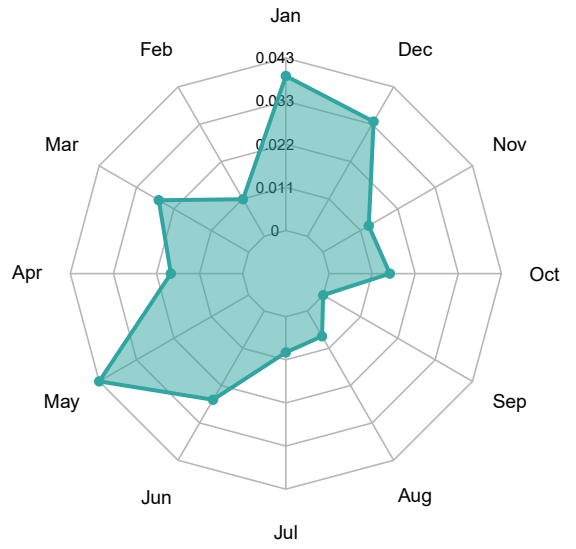

**Meningococcal disease**

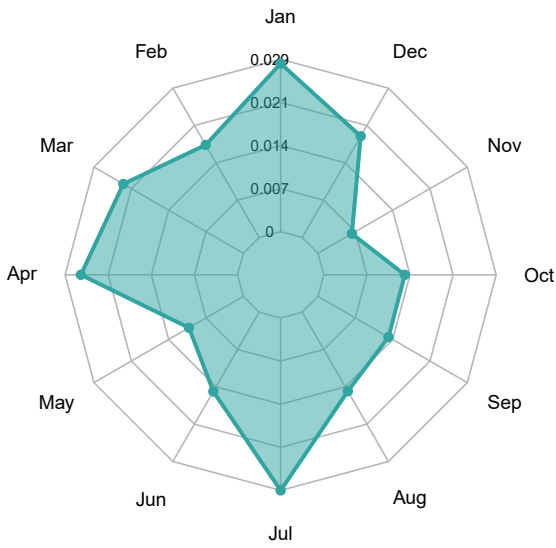

**Leprosy**

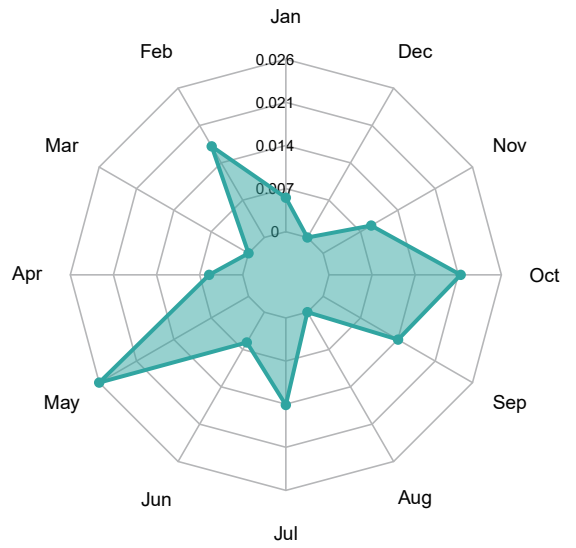

**Streptococcal pharyngitis**

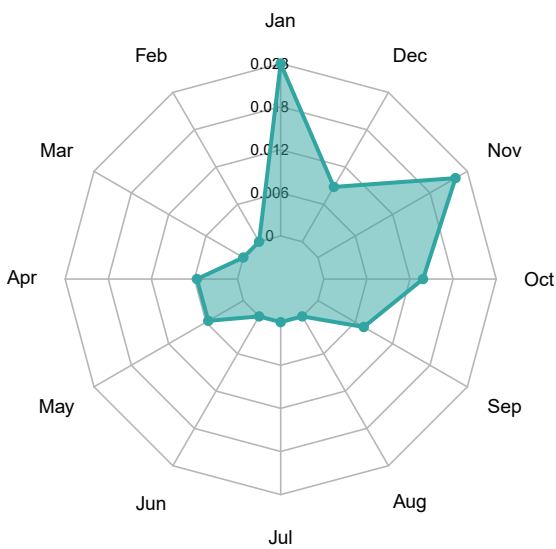

**Legionellosis**

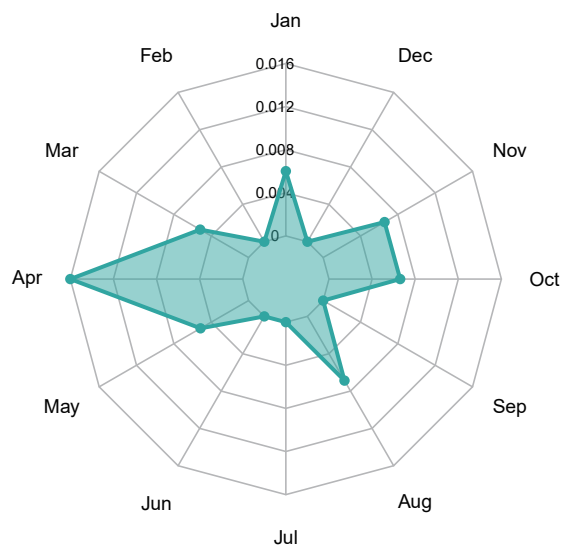



**Epidemic cerebrospinal meningitis**

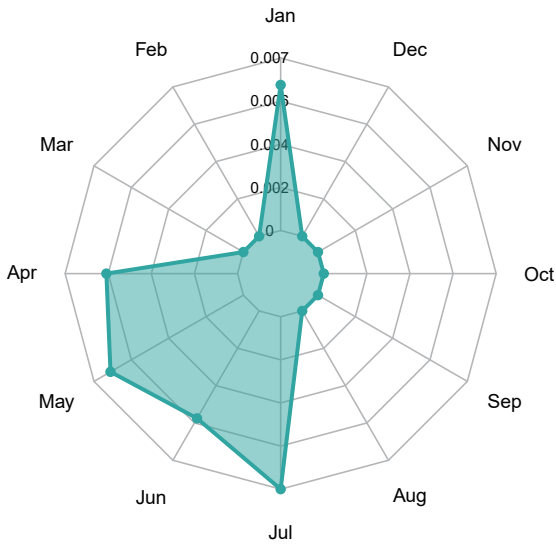

**Nocardiosis**

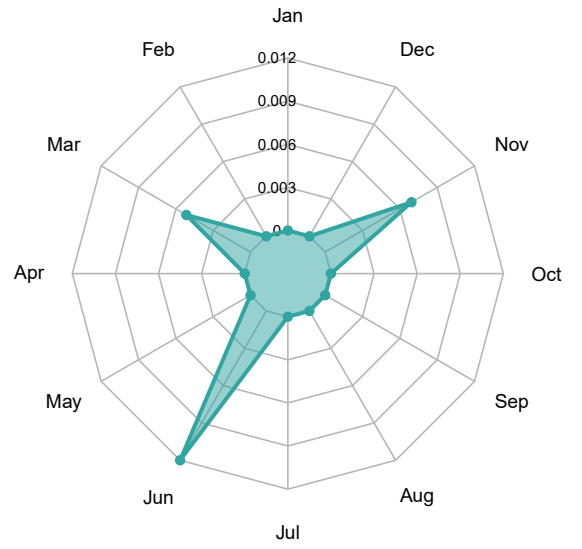

**Histoplasmosis**

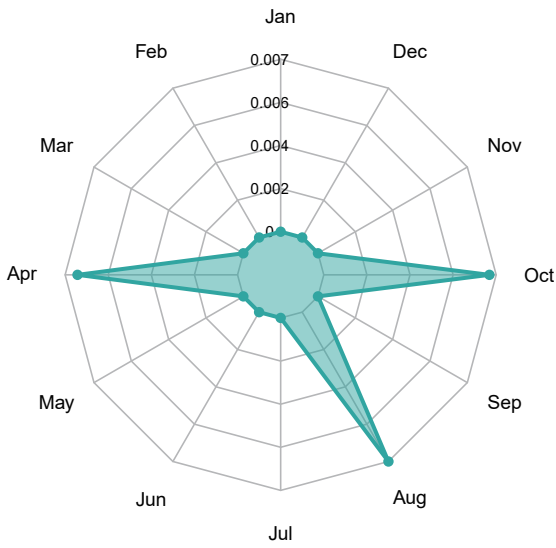

**Erythema infectiosum**

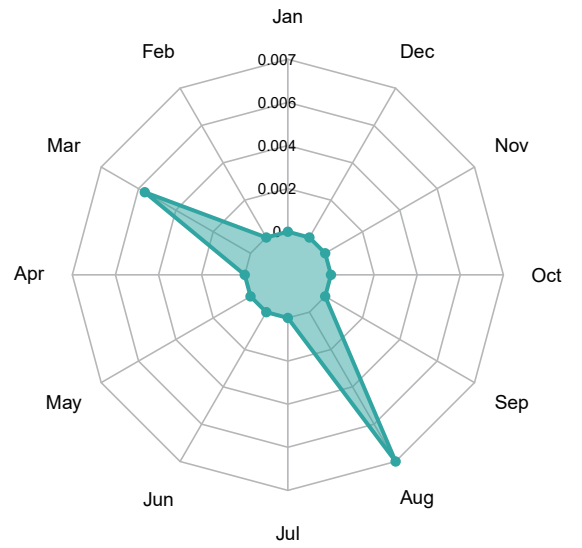

**Coccidioidomycosis**

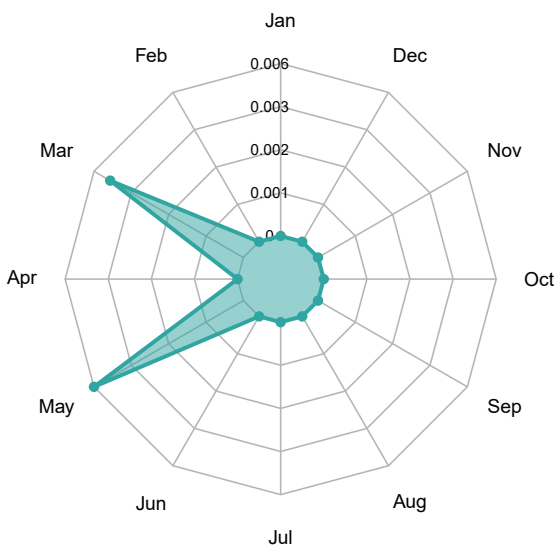

**Typhoid**

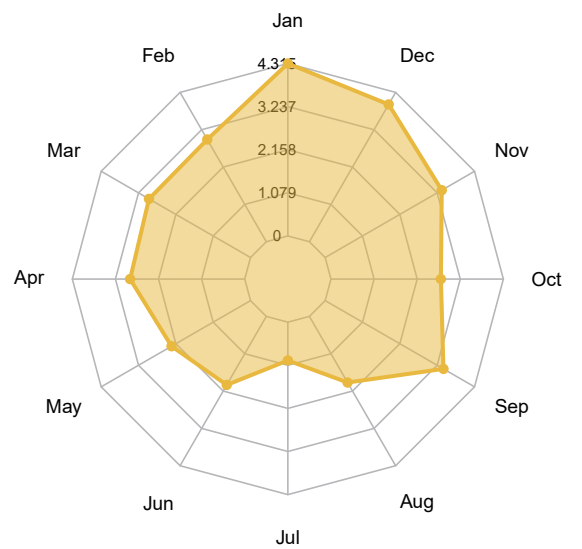

**Other infectious diarrhoea**

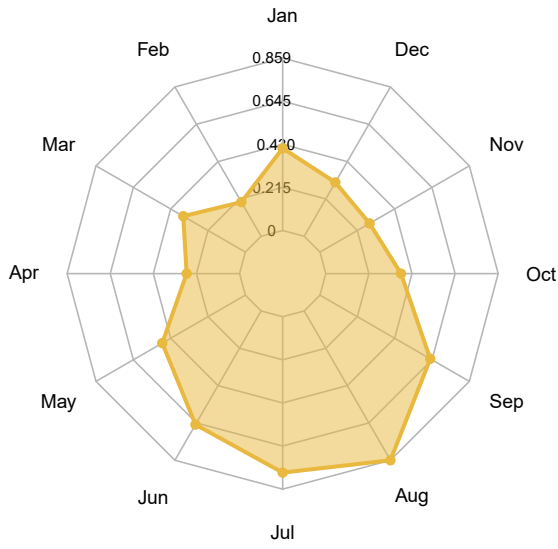

**Ascariasis**

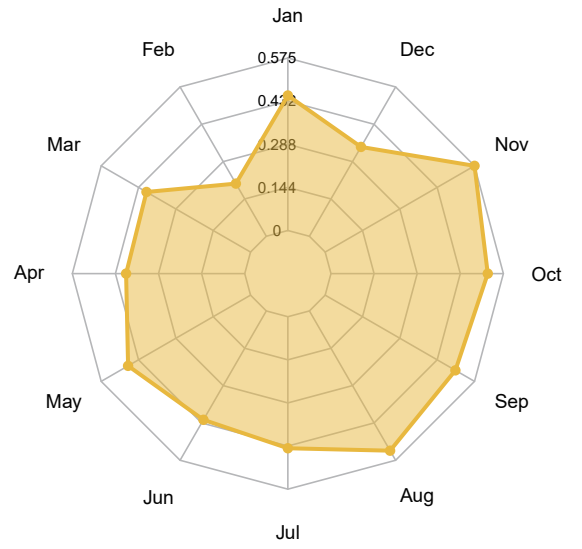

**Bacterial dysentery**

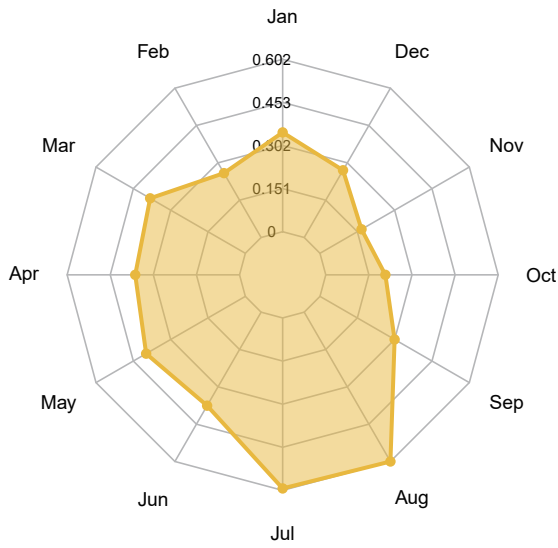

**Paratyphoid**

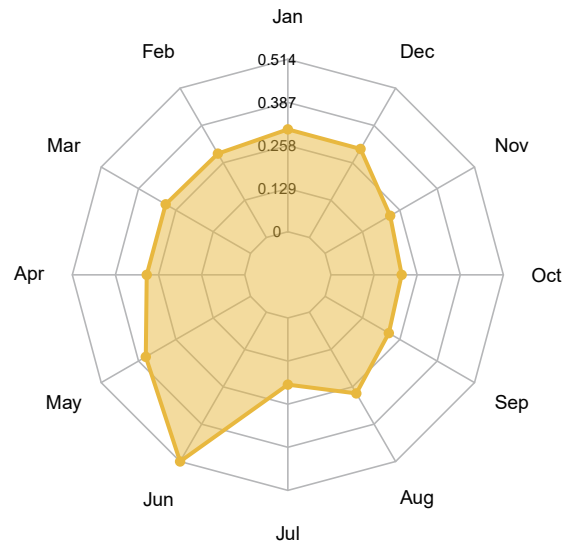

**Amoebic dysentery**

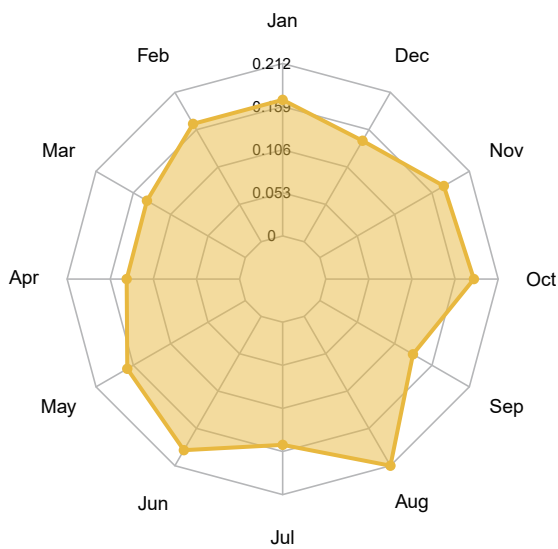

**Gastroenteritis due to Rotavirus**

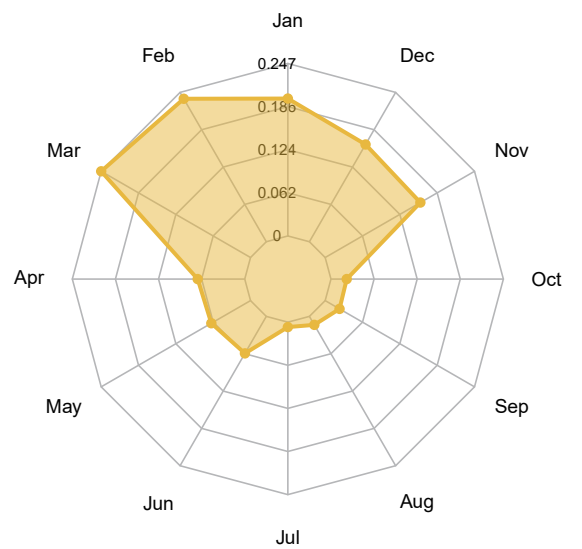

**Intestinal infections due to *Escherichia coli***

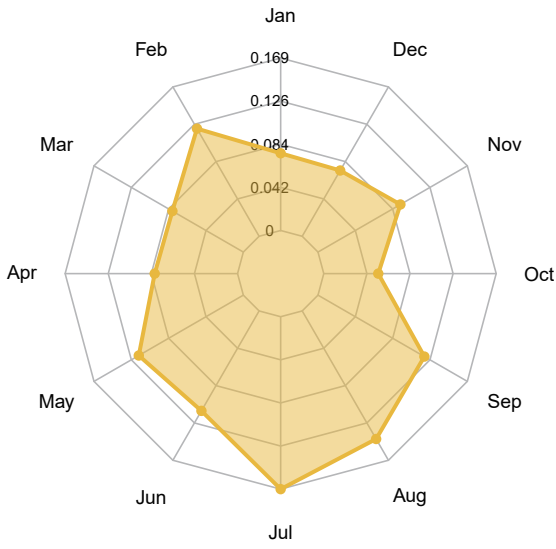

**Oesophagostomiasis**

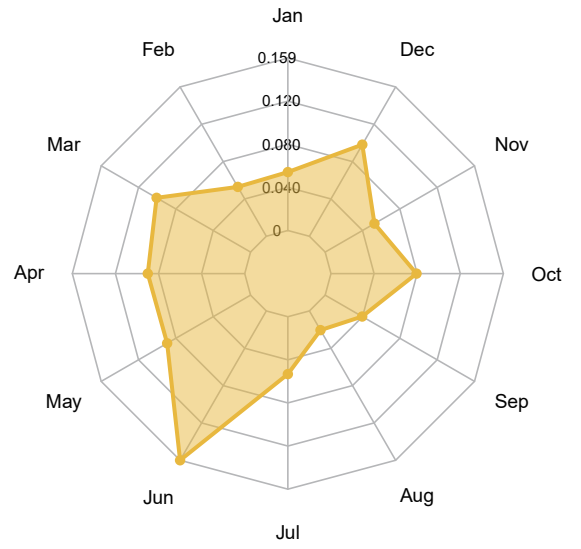

**Hepatitis A**

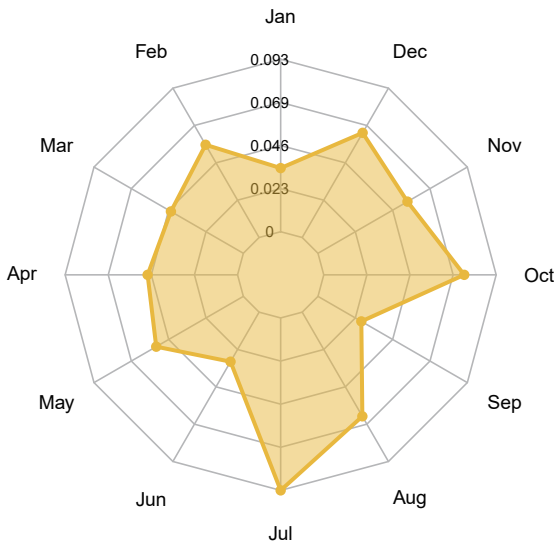

**Enterobiasis**

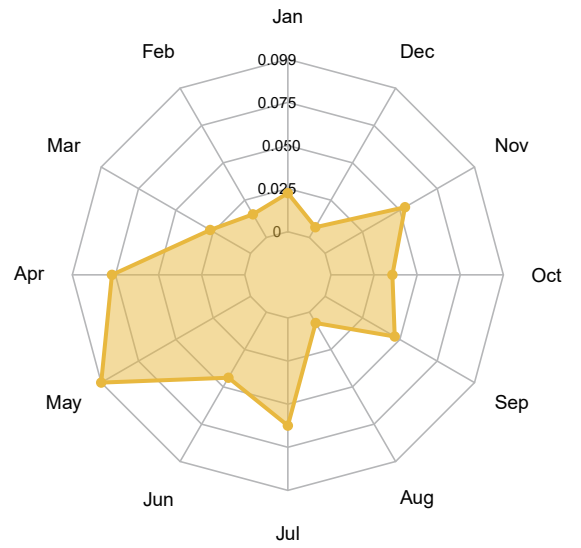

**Hepatitis E**

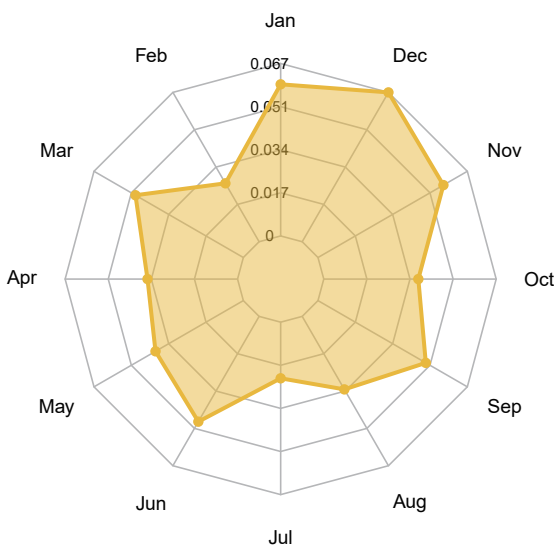

**Bacterial foodborne intoxications, unspecified**

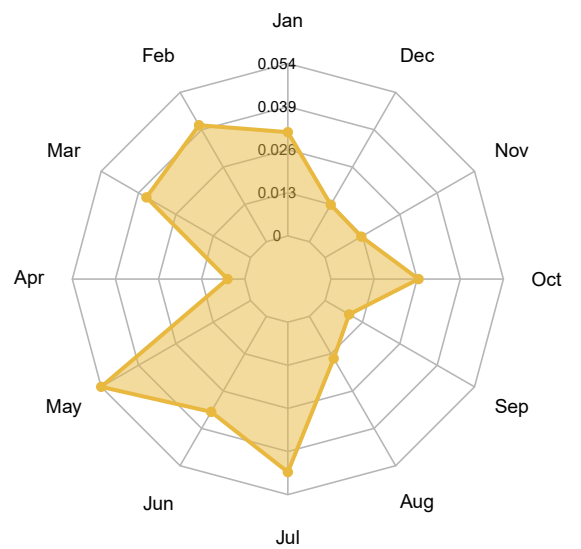

**Enteritis due to Norovirus**

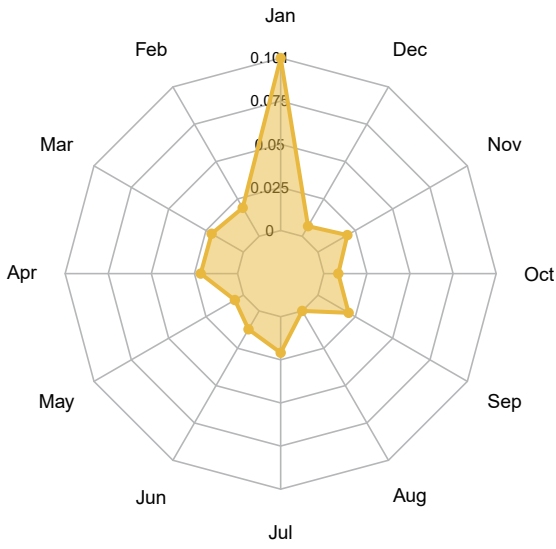

**Cysticercosis**

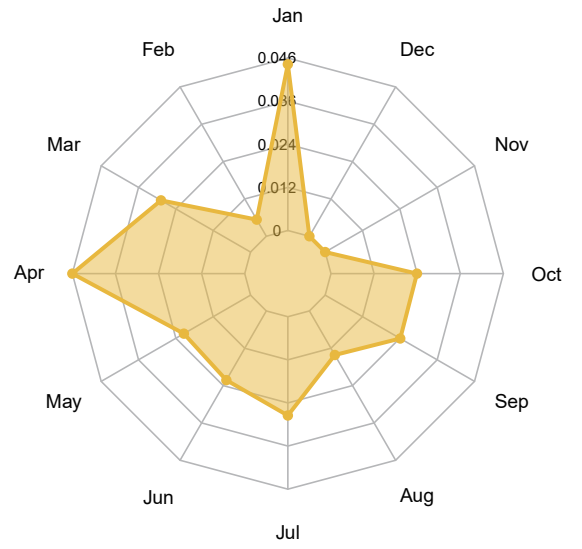

**Infections due to other *Salmonella***

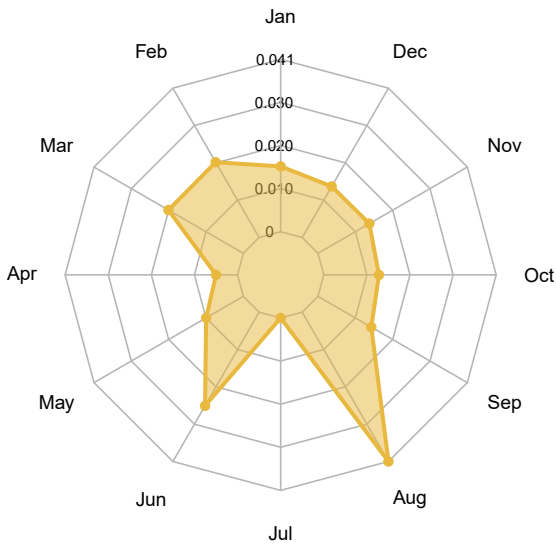

**Taeniasis**

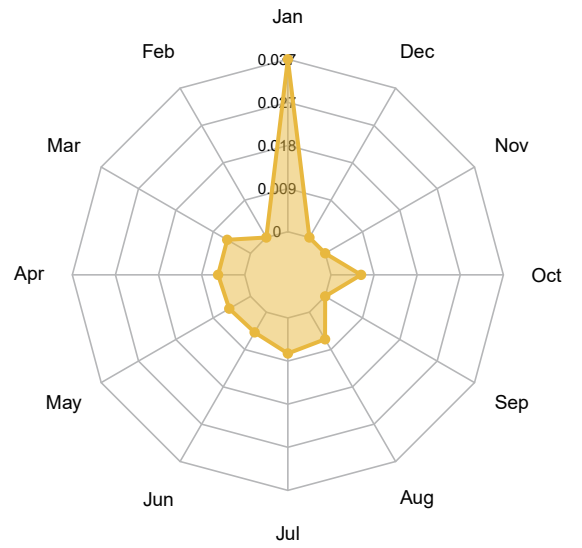

**Campylobacteriosis**

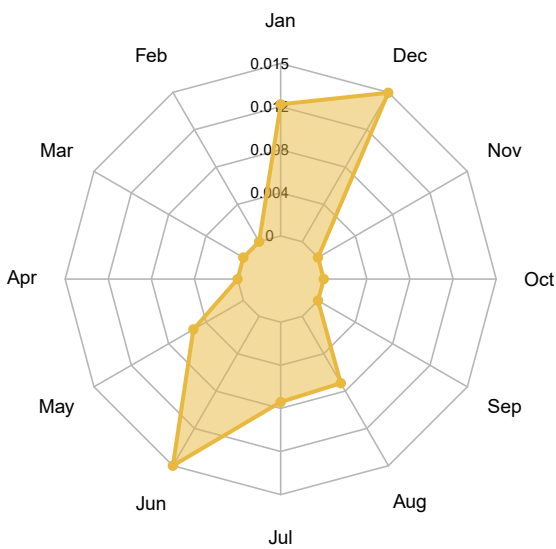

**Toxoplasmosis**

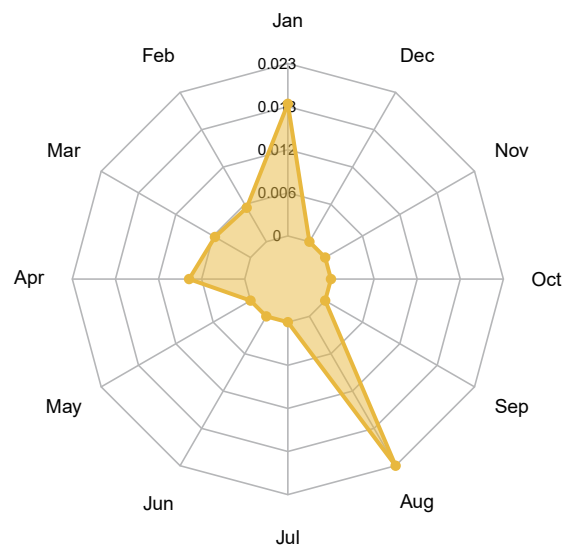

**Clonorchiasis**

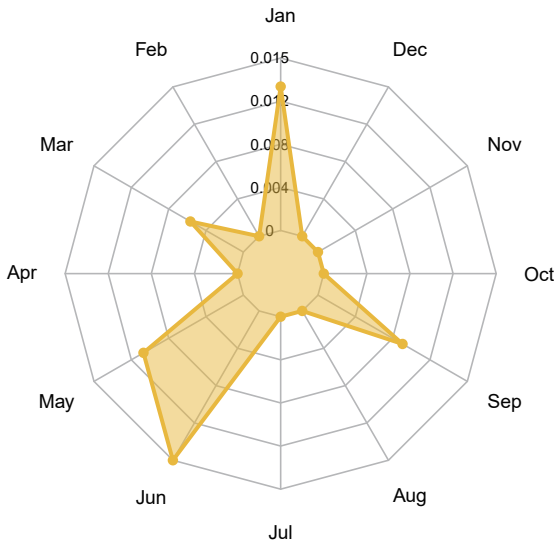

**Botulism**

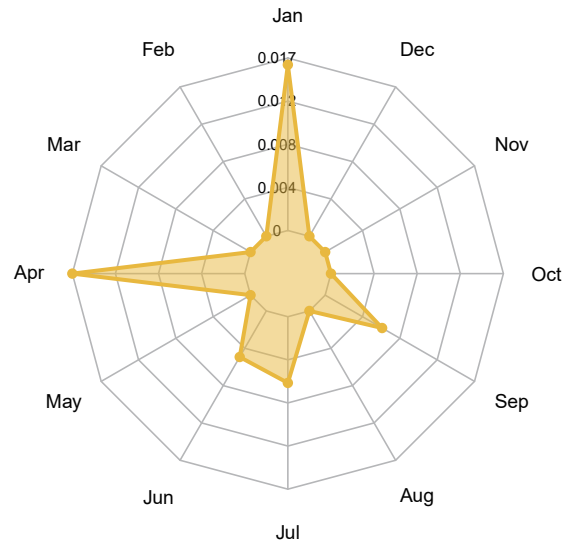

**Paragonimiasis**

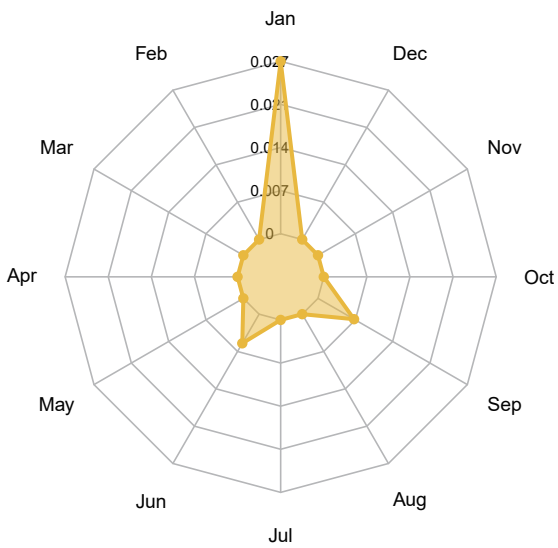

**Trichuriasis**

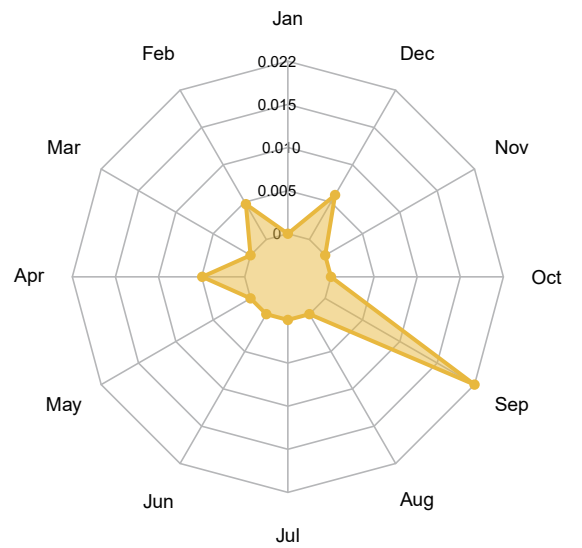

**Cryptosporidiosis**

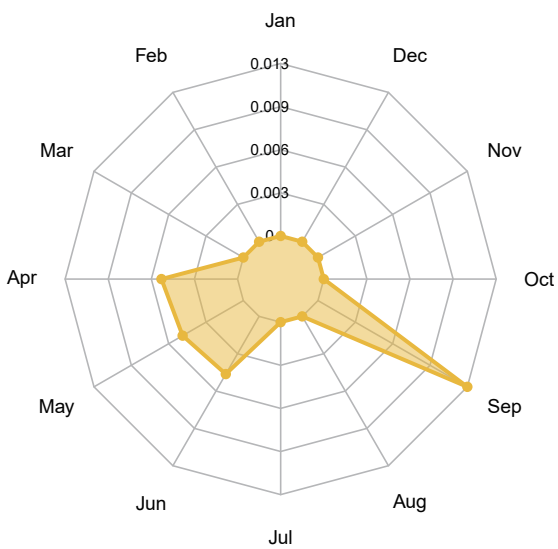

**Capillariasis**

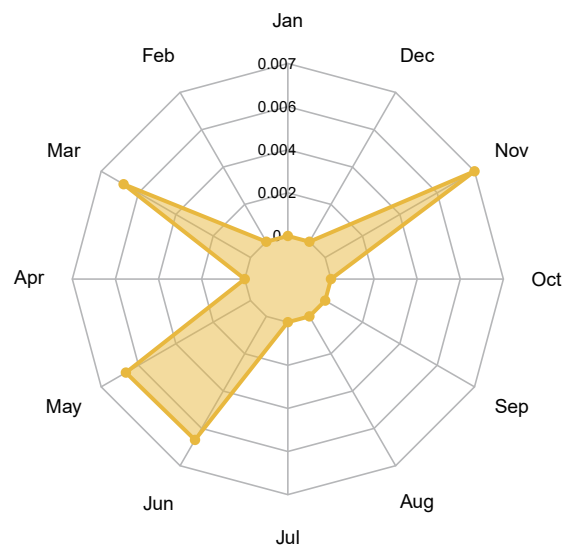

**Enteritis due to Adenovirus**

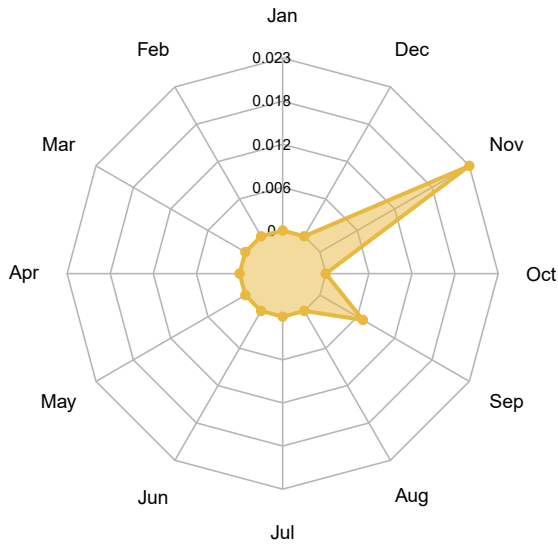

**Listeriosis**

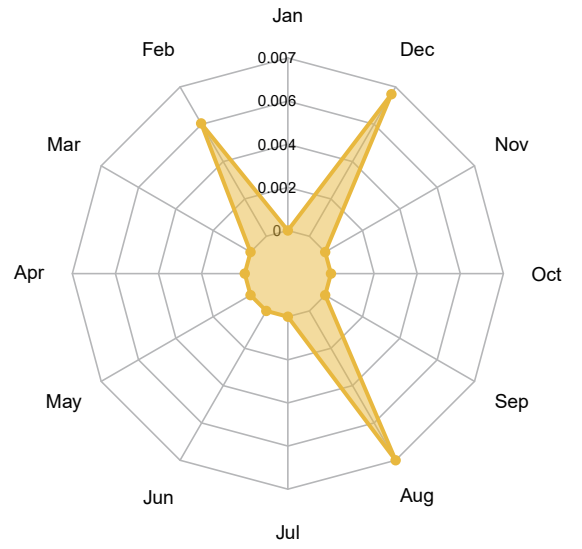

**Epidemic myalgia**

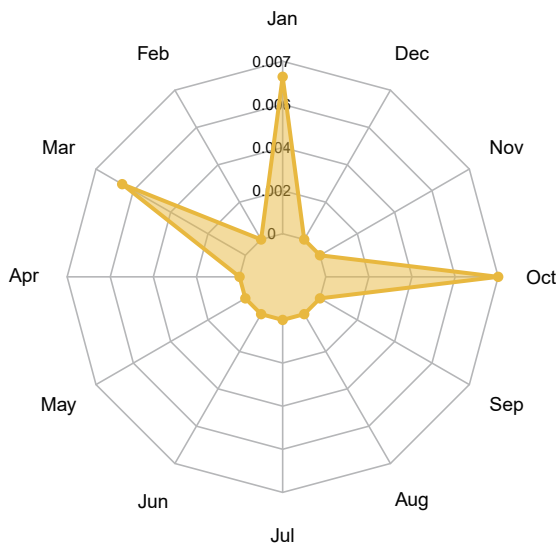

**Foodborne Bacillus cereus intoxication**

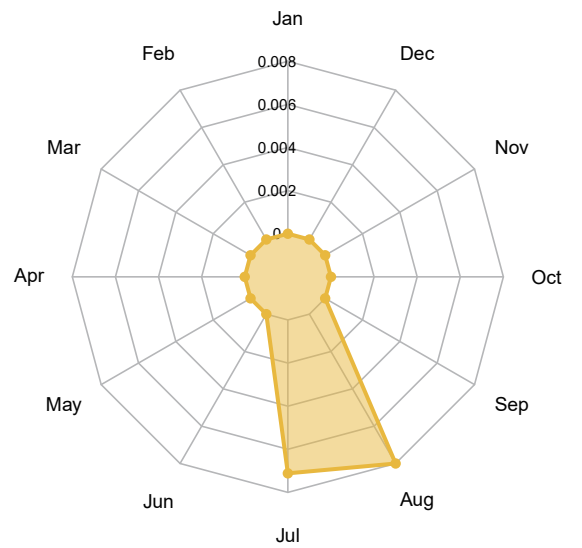

**Intestinal infections due to Yersinia enterocolitica**

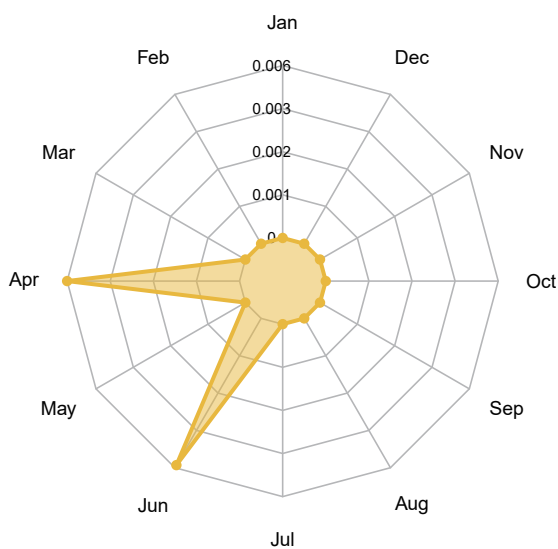

**Foodborne Clostridium perfringens intoxication**

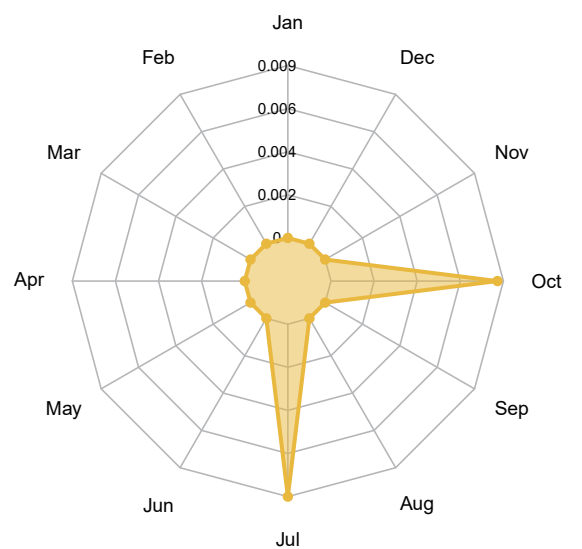

**Giardiasis**

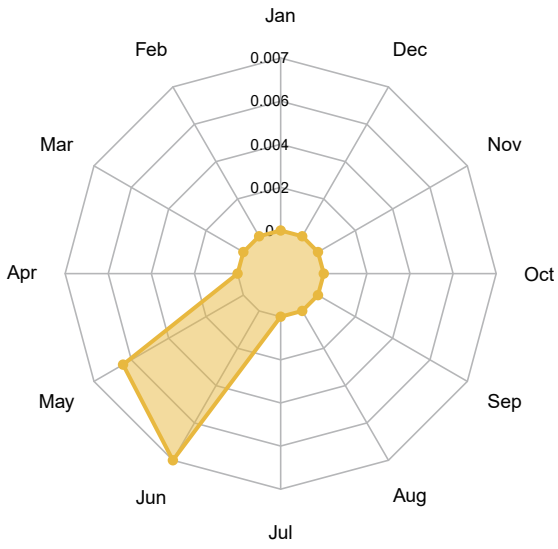

**Foodborne staphylococcal intoxication**

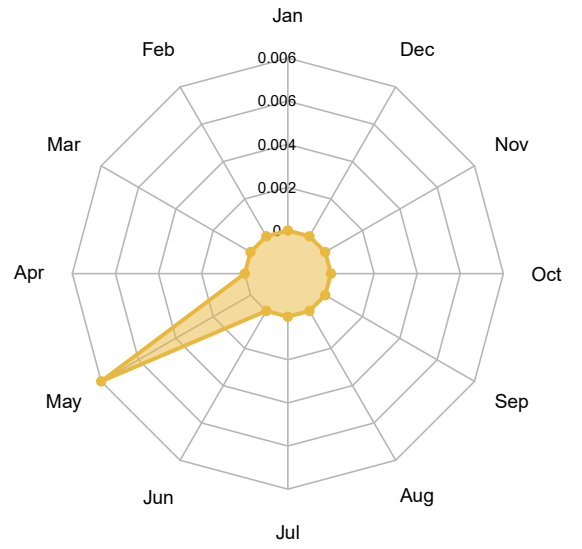

**Dipylidiasis**

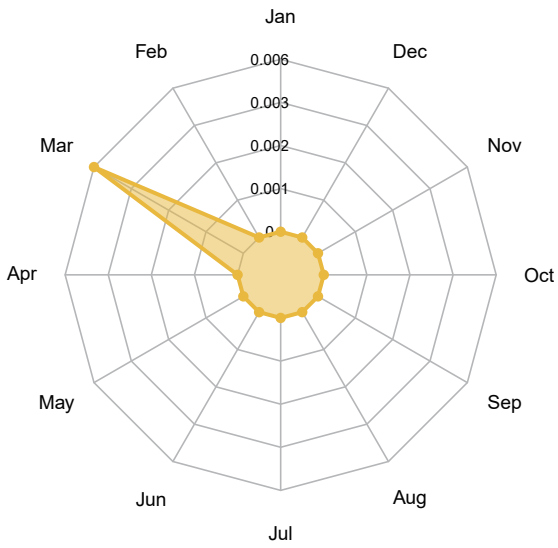

**Cystoisosporiasis**

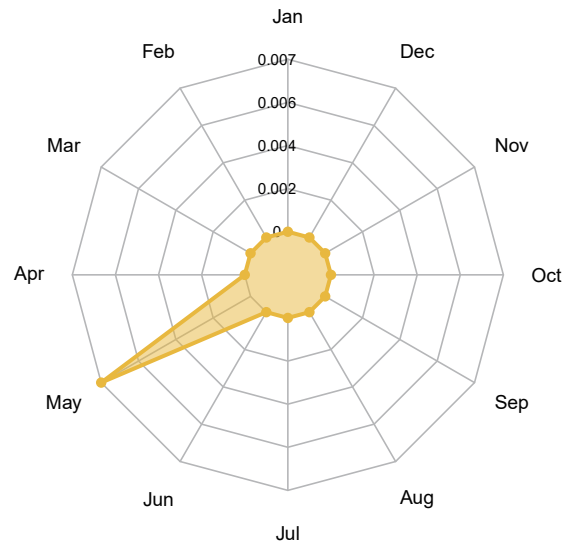

**Fascioliasis**

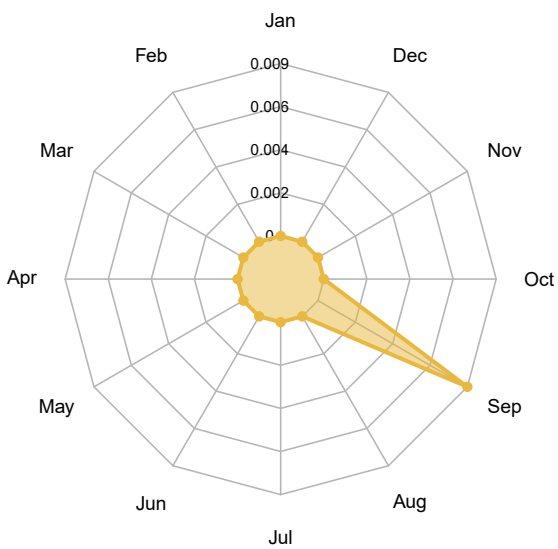

**Syngamosis**

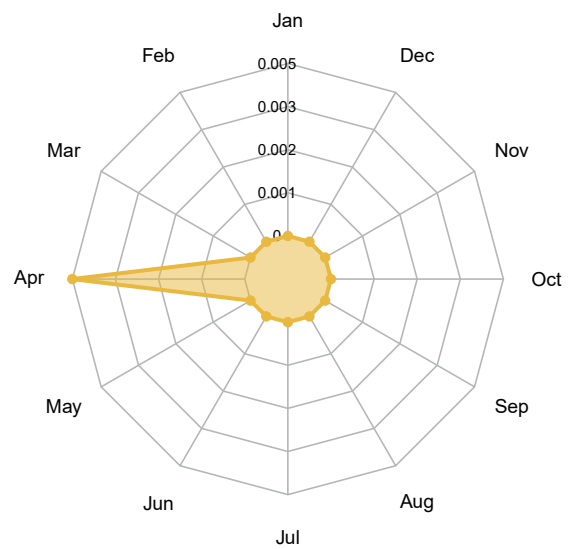

**Brucellosis**

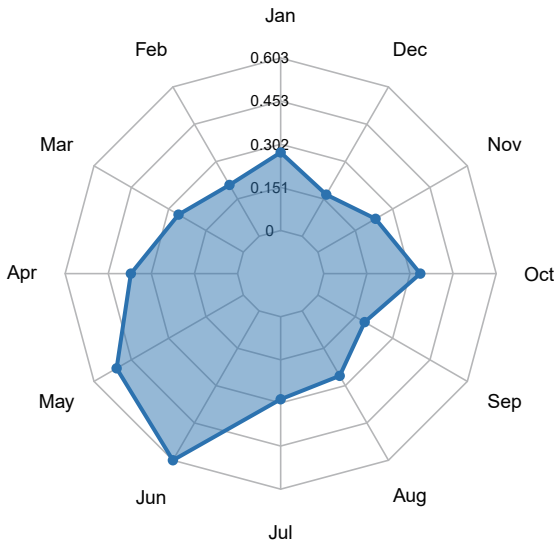

**Hemorrhagic fever**

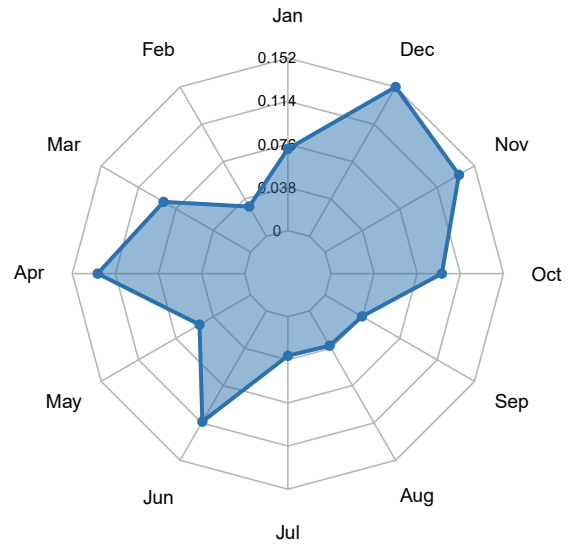

**Typhus fever**

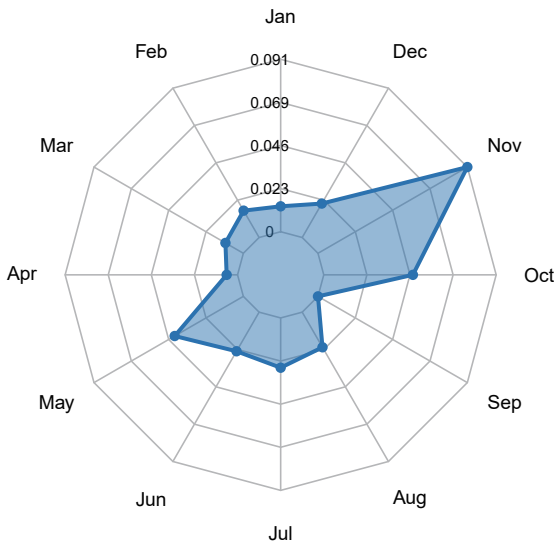

**Orf**

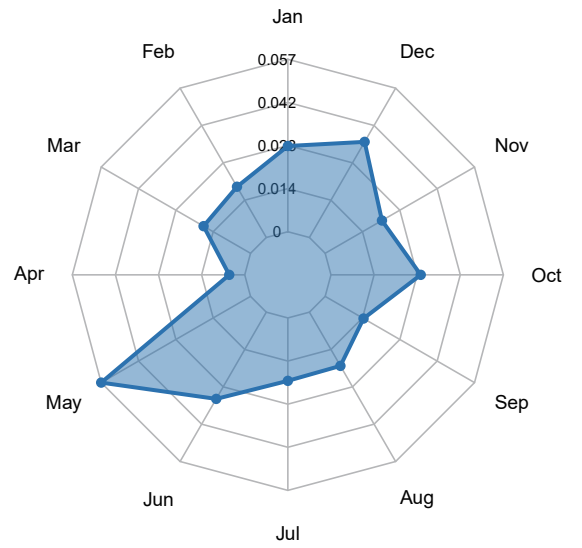

**Erysipeloid**

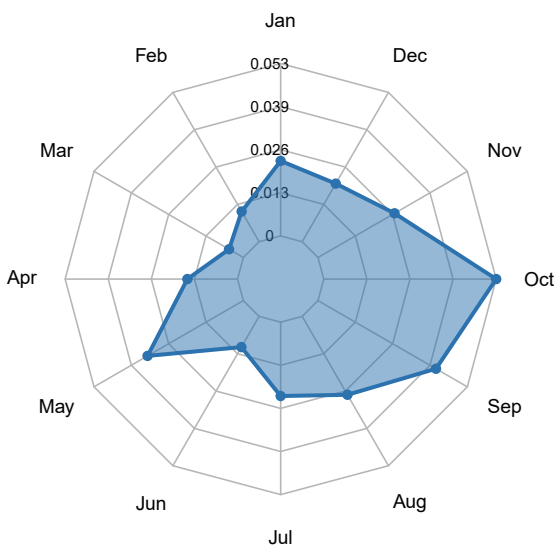

**Severe fever with thrombocytopenia syndrome**

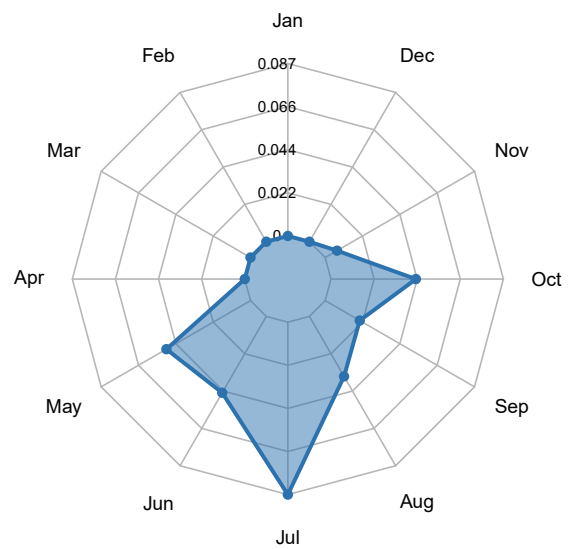



**Malaria**

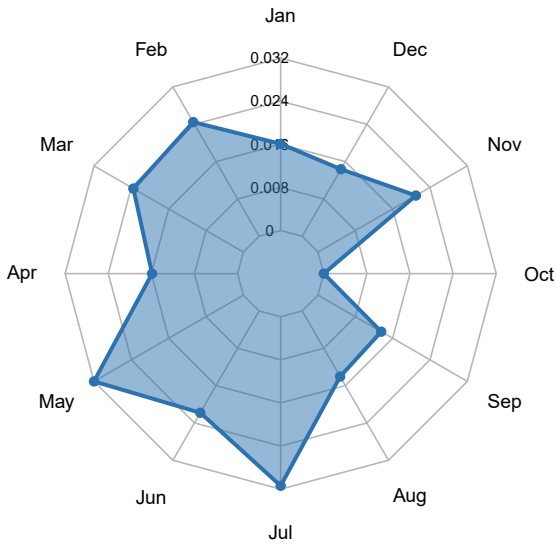

**Spotted fever**

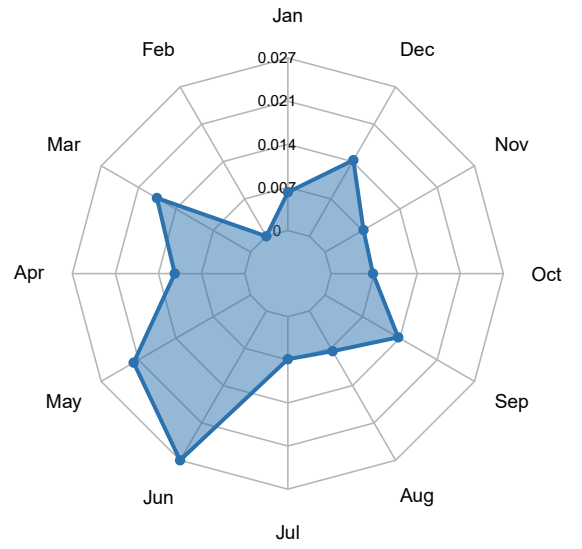

**Tularemia**

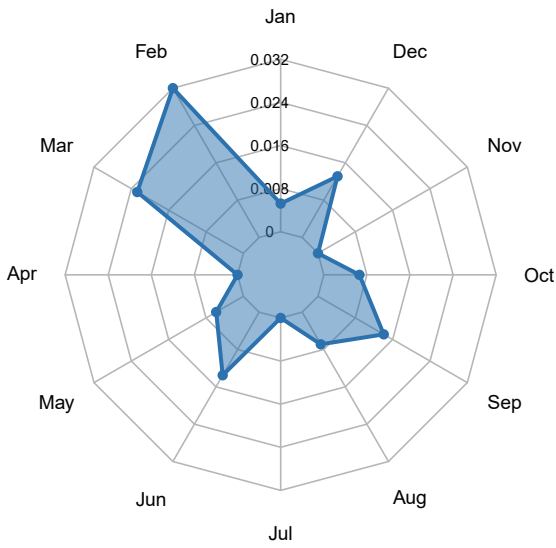

**Leptospirosis**

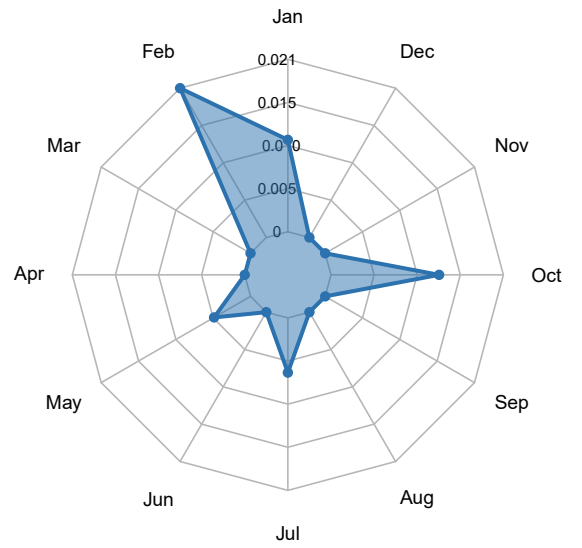

**Epidemic encephalitis B**

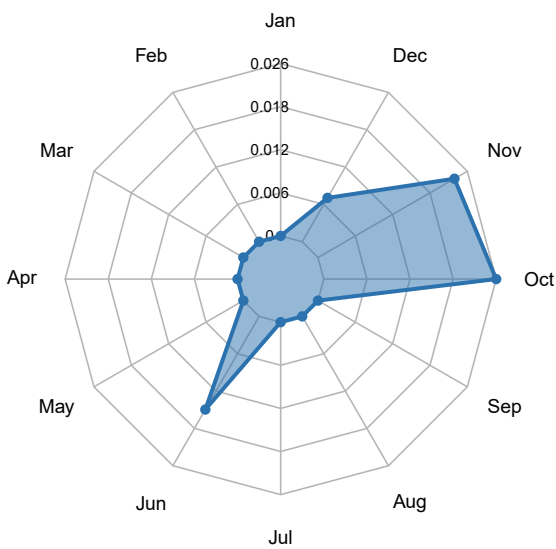

**Extraintestinal yersiniosis**

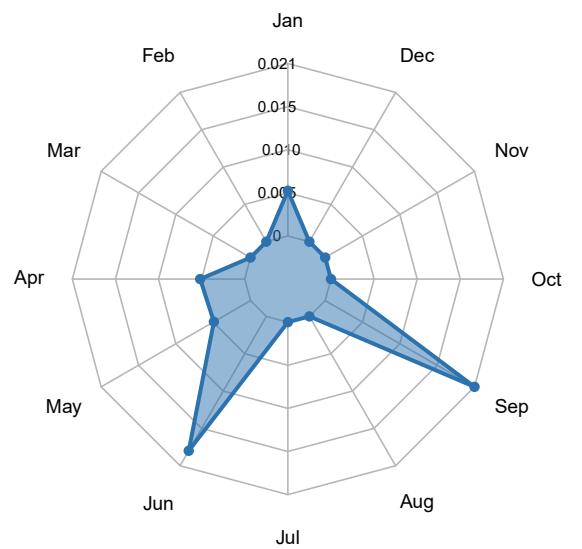

**Glanders**

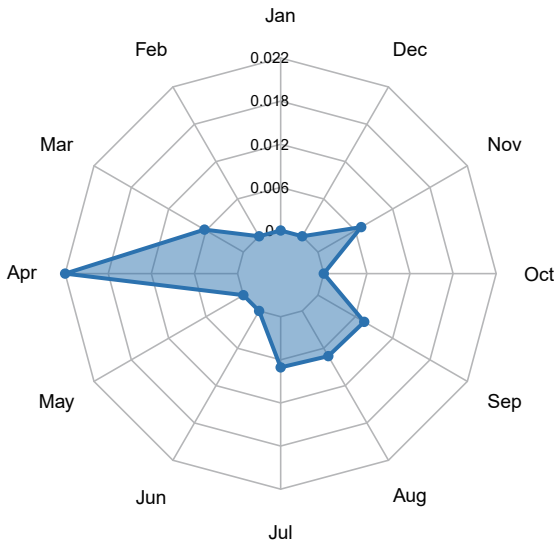

**Cat-scratch disease**

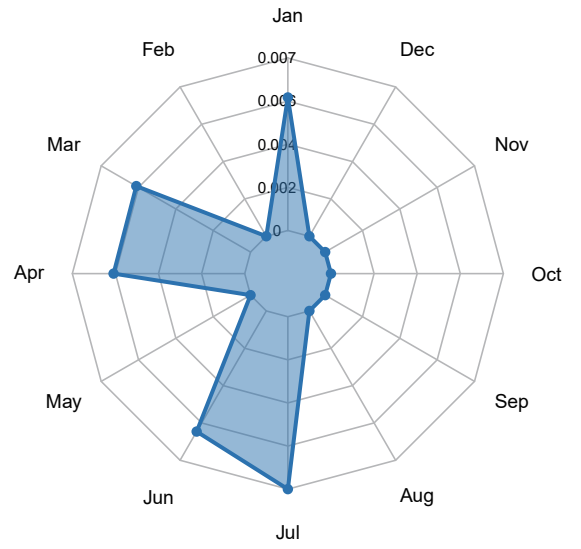

**Relapsing fever**

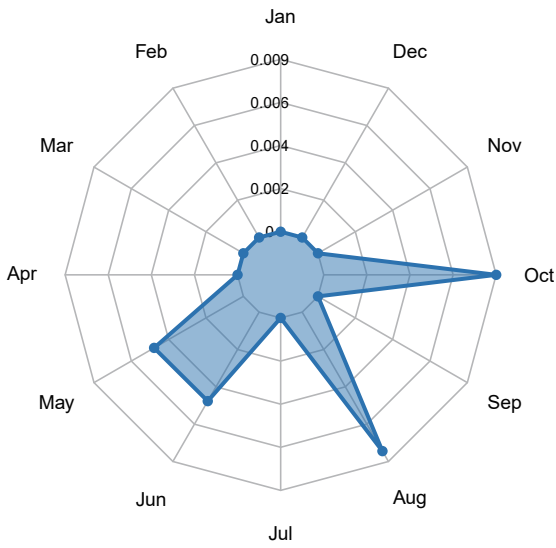

**Monkeypox**

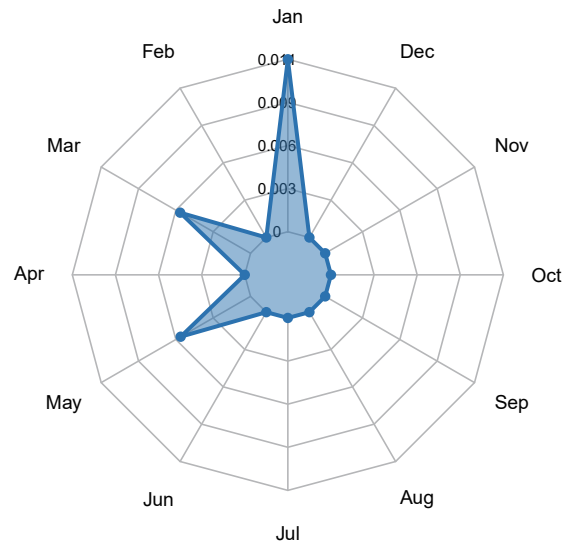

**Q fever**

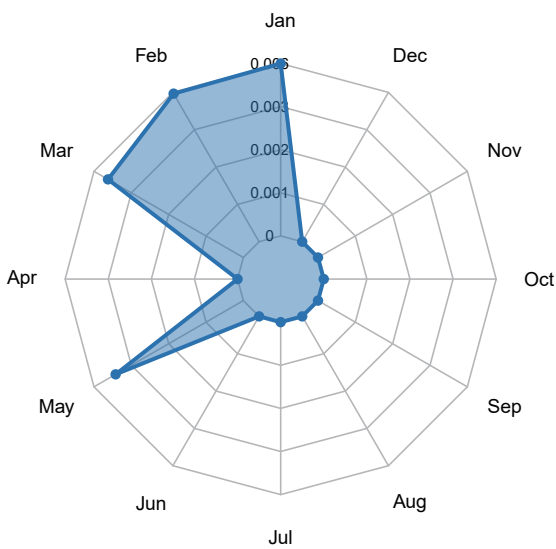

**Yellow fever**

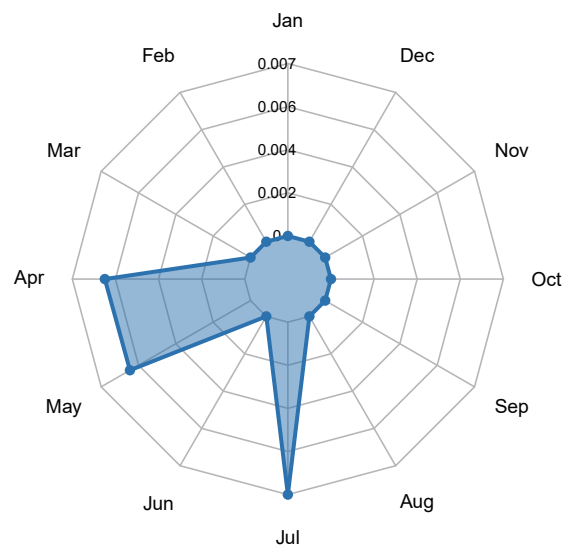

**Eastern equine encephalitis**

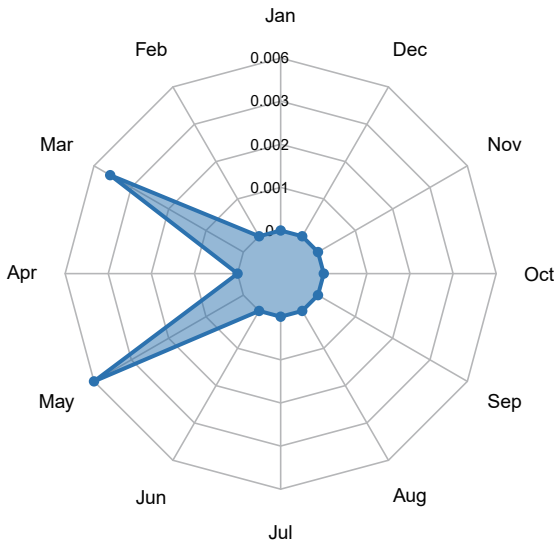

**Melioidosis**

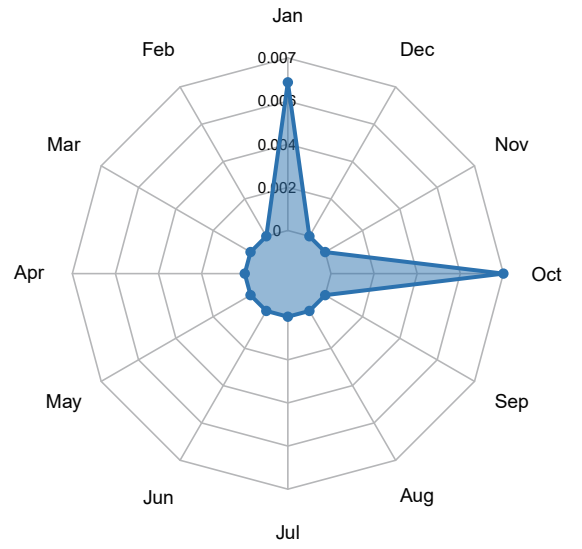

**African trypanosomiasis**

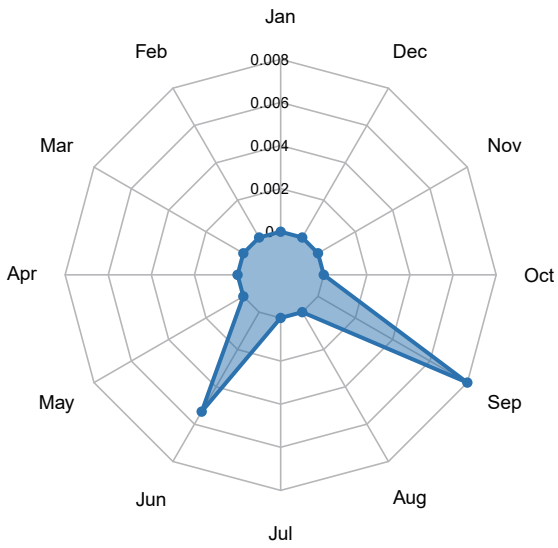

**Visceral leishmaniasis**

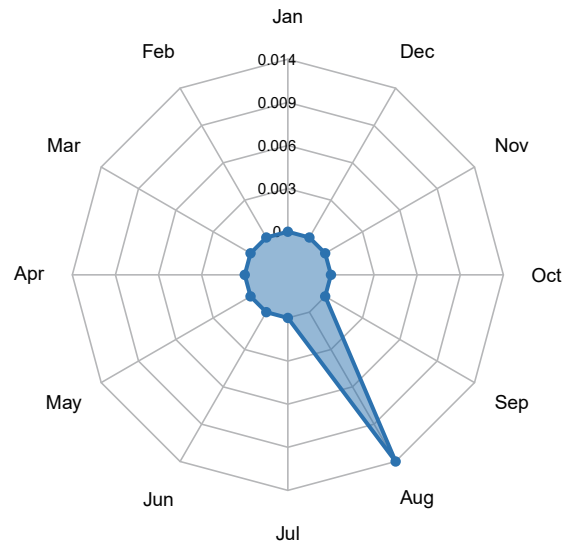

**Dengue**

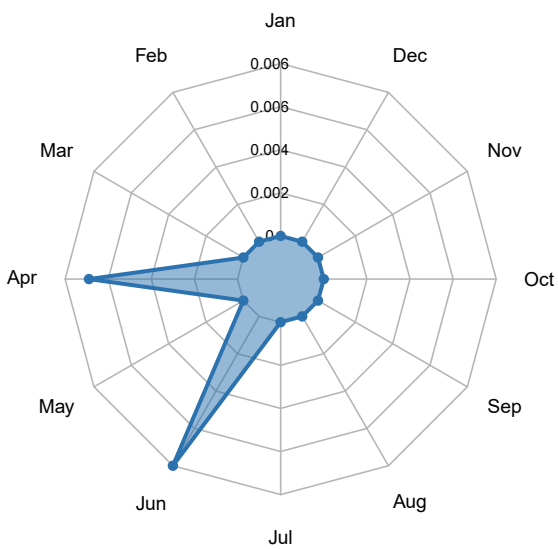

**Bartonellosis**

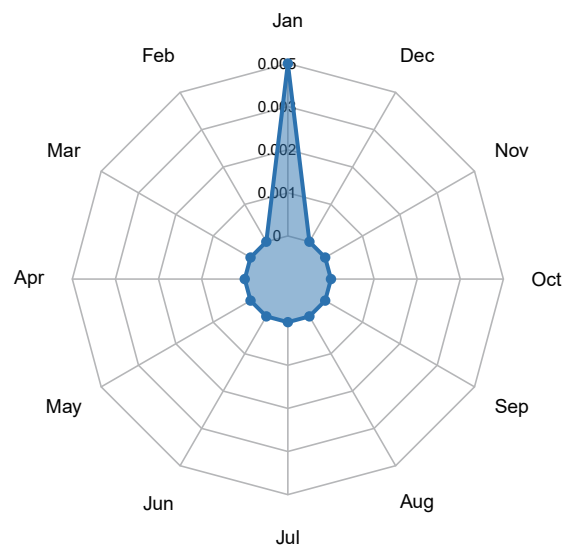

**Crimean-Congo haemorrhagic fever**

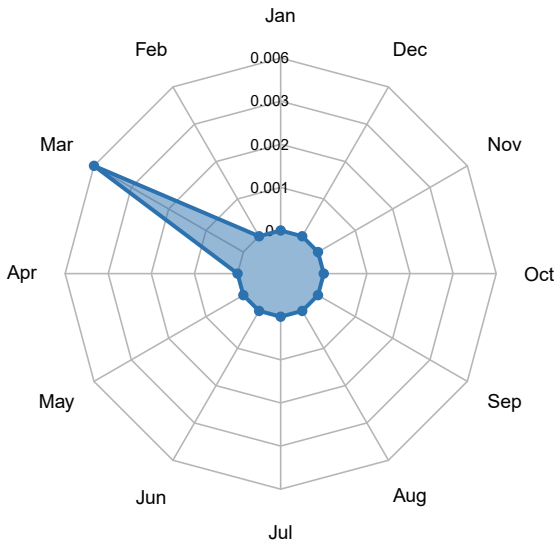

**Rickettsialpox**

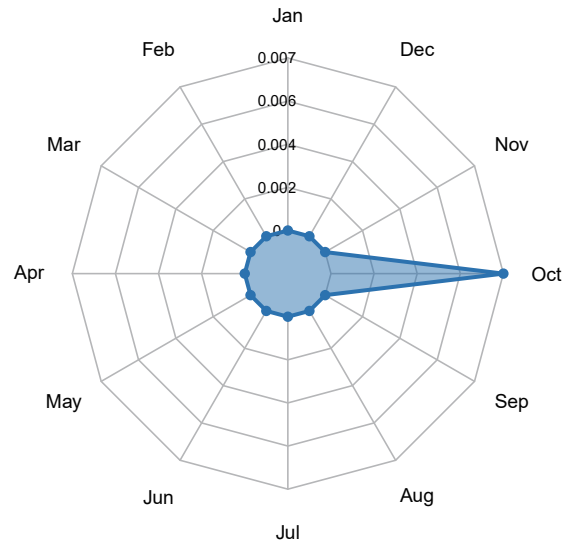

**Lyme borreliosis**

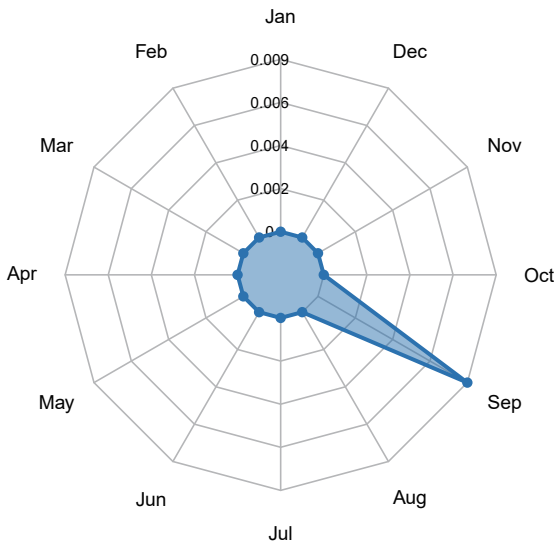

**Hepatitis B**

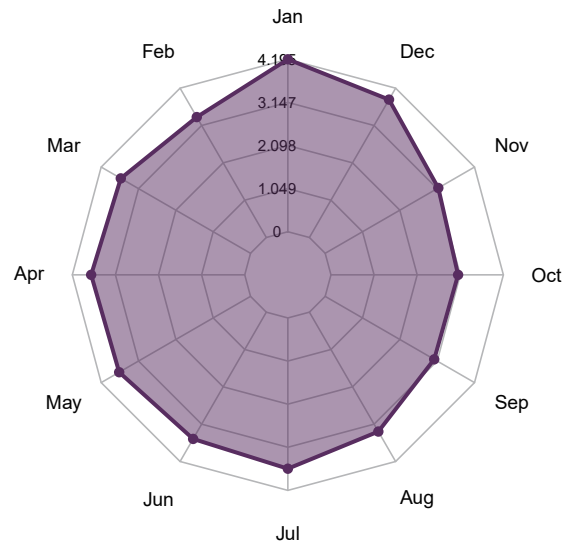

**Syphilis**

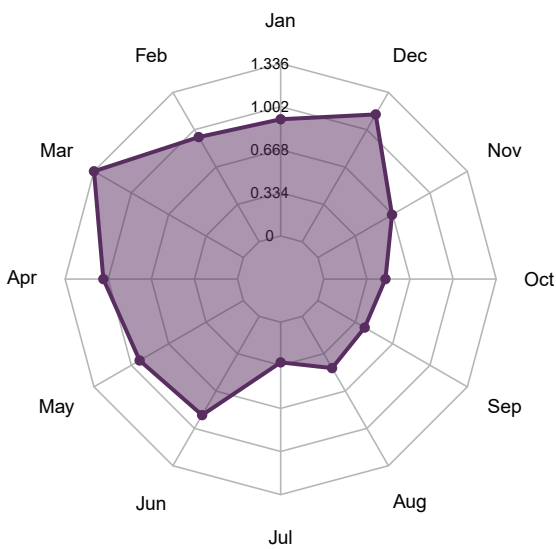

**Hepatitis C**

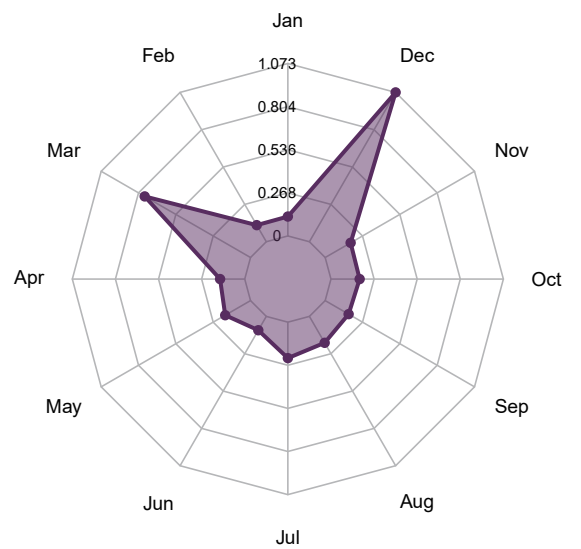

**Gonorrhea**

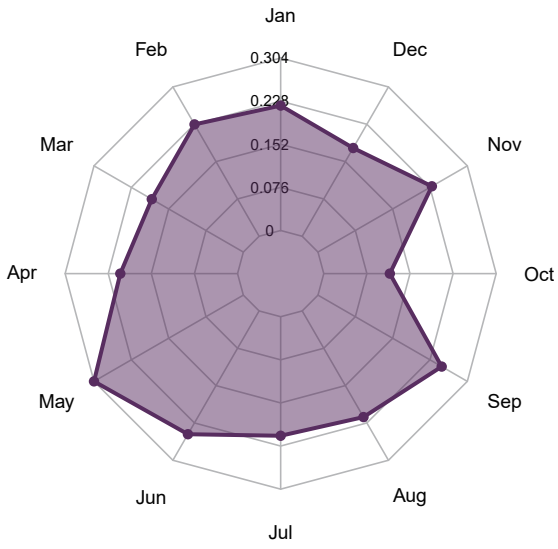

**Trichomoniasis**

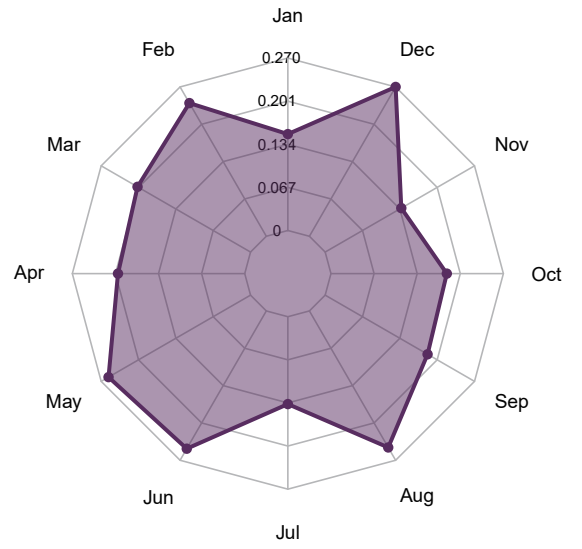

**Anogenital warts**

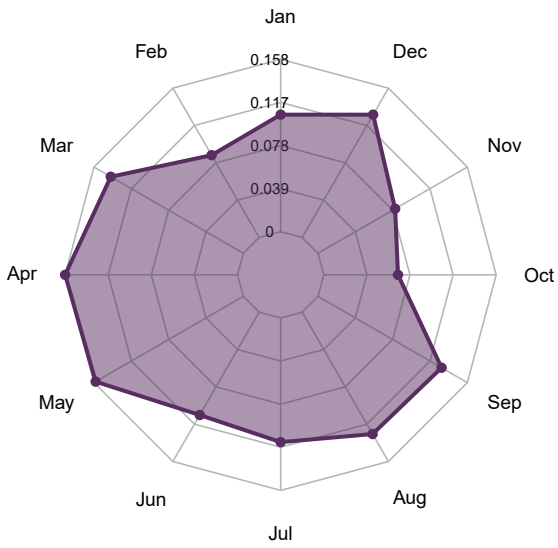

**Cytomegaloviral disease**

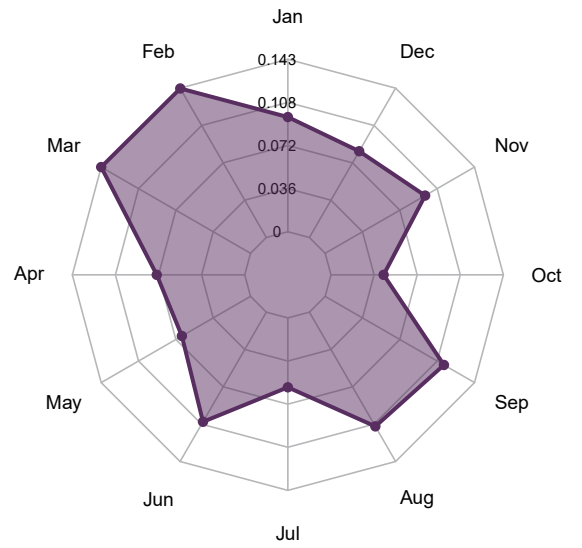

**HIV infection**

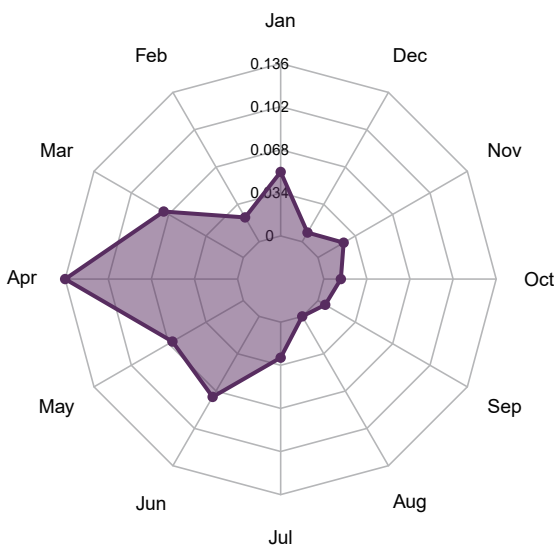

**Anogenital herpes simplex infection**

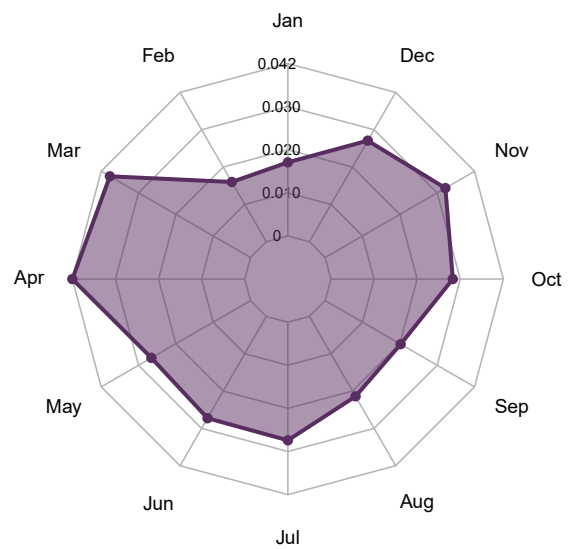

**Granuloma inguinale**

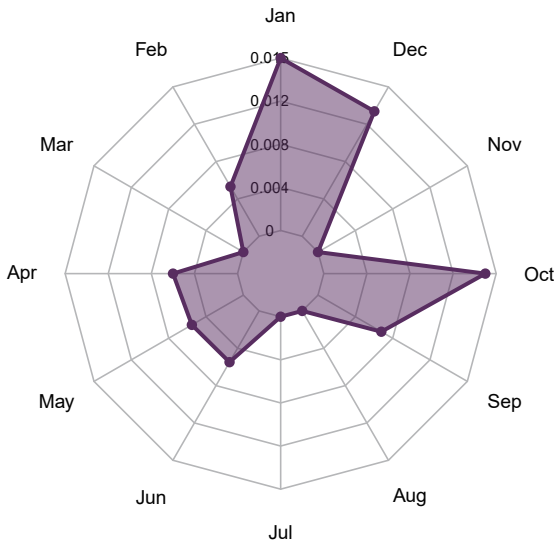

**Hepatitis D**

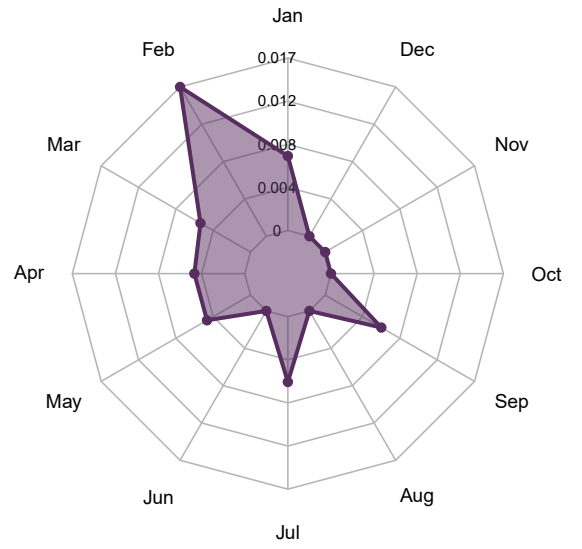

**Chancroid**

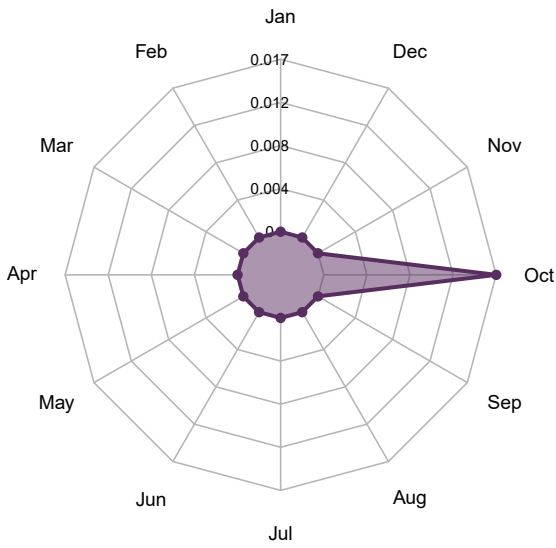

**Warts of lips or oral cavity**

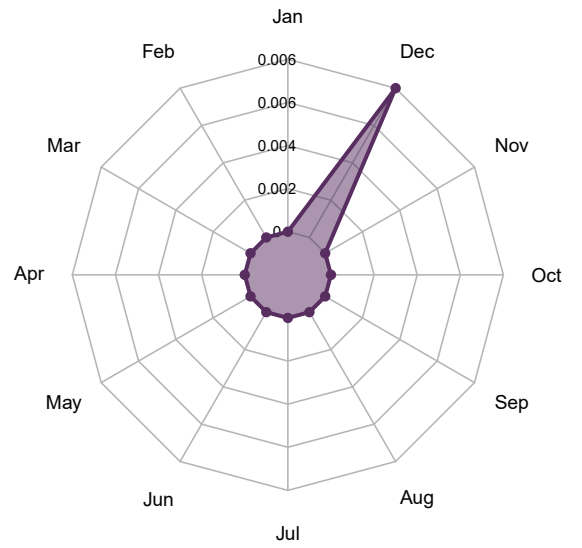

**Zoster**

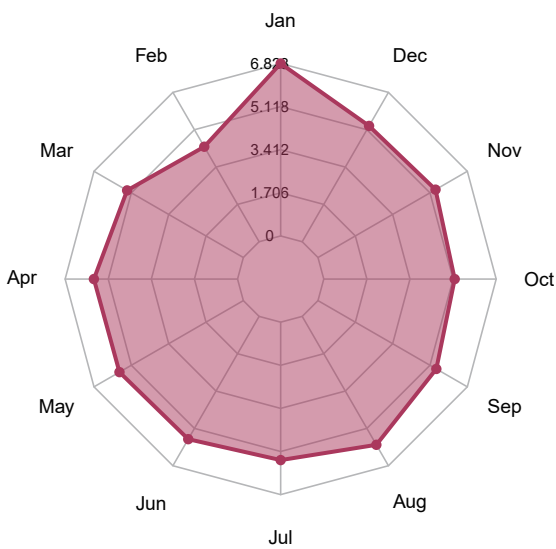

**Hand, foot, and mouth disease**

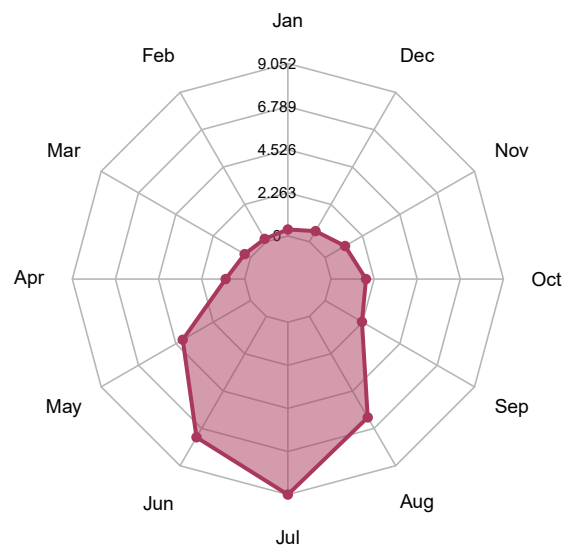

**Viral conjunctivitis**

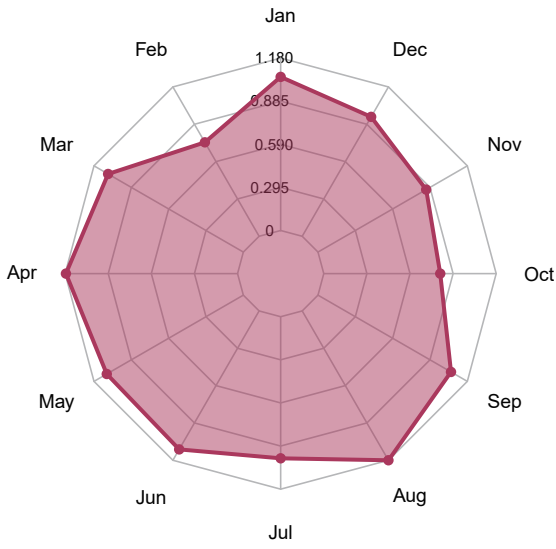

**Trachoma**

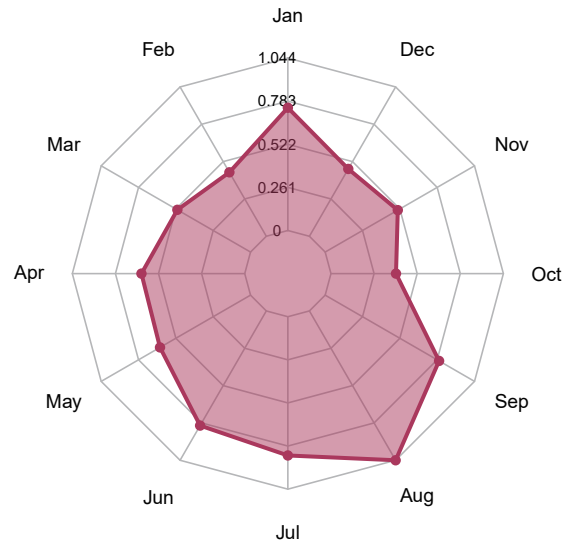

**Common warts**

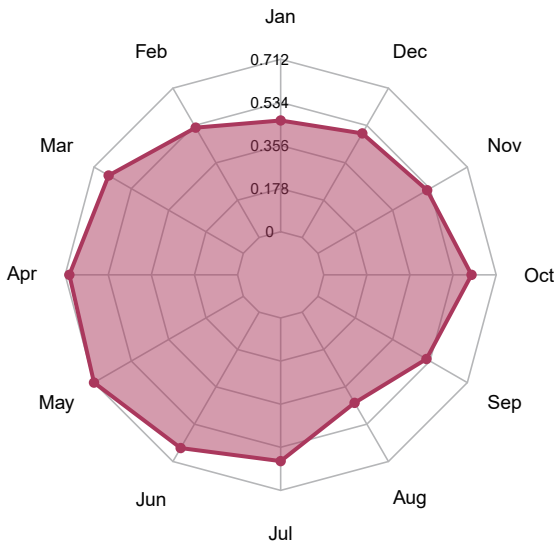

**Herpes simplex infections**

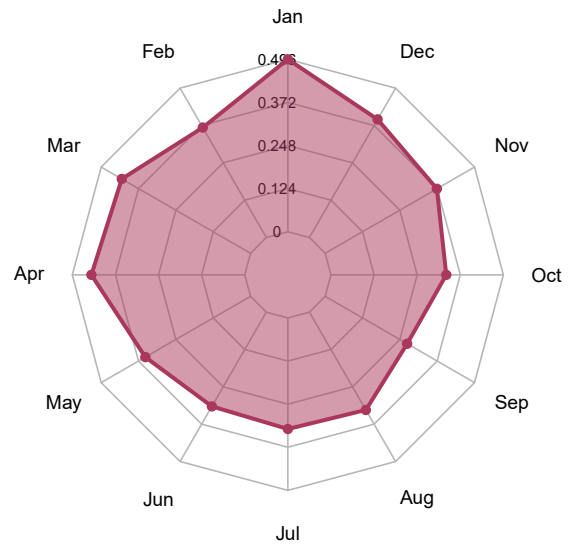

**Plane warts**

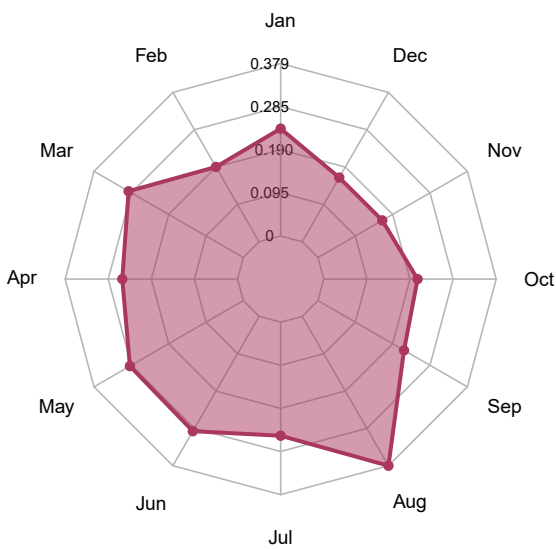

**Impetigo**

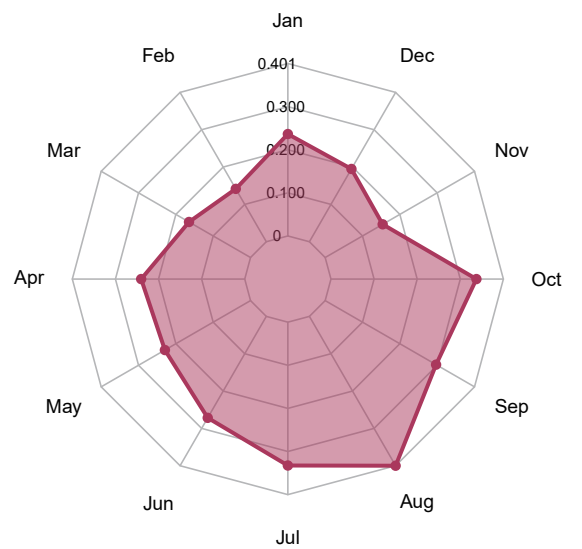

**Non-dermatophyte superficial dermatomycoses**

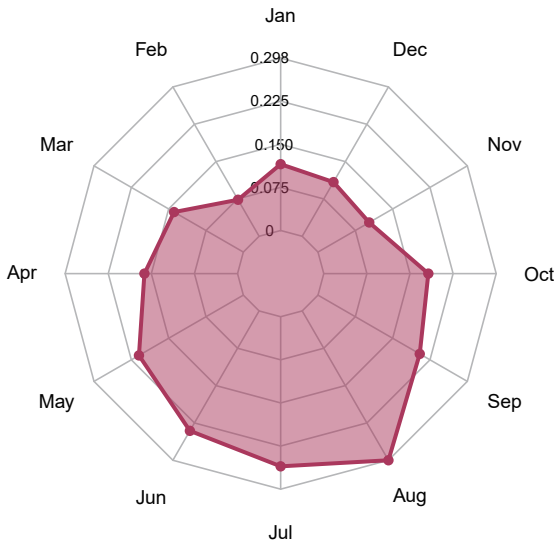

**Molluscum contagiosum**

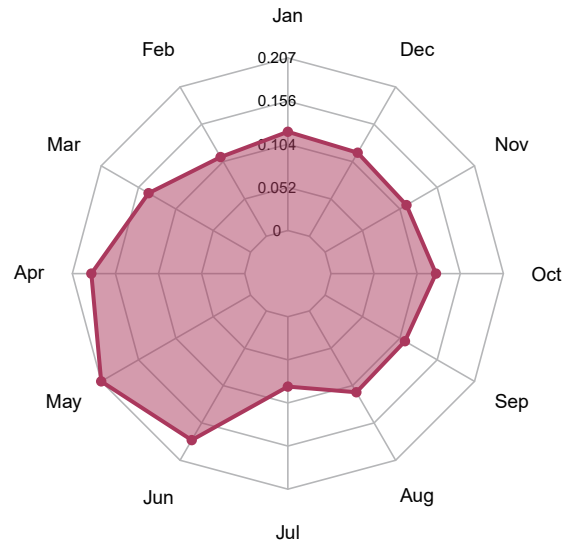

**Infectious mononucleosis**

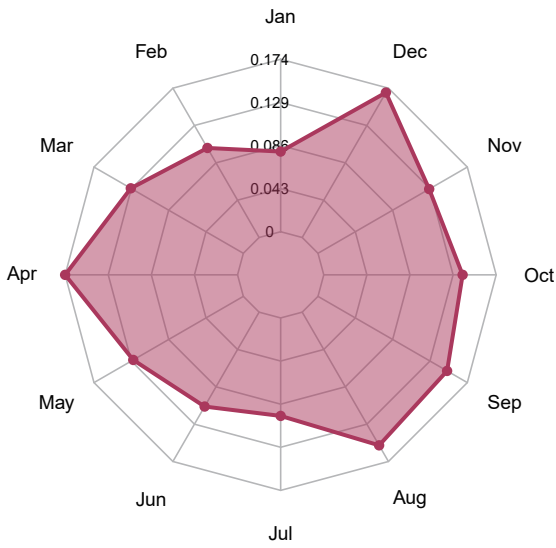

**Scabies**

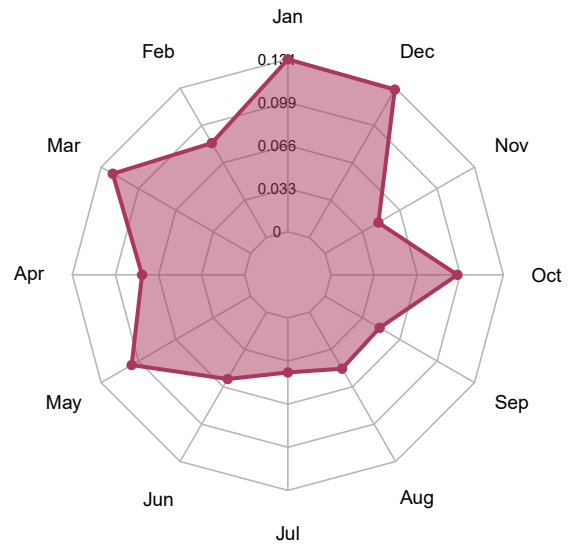

**Picornavirus infections presenting in the skin or mucous membranes**

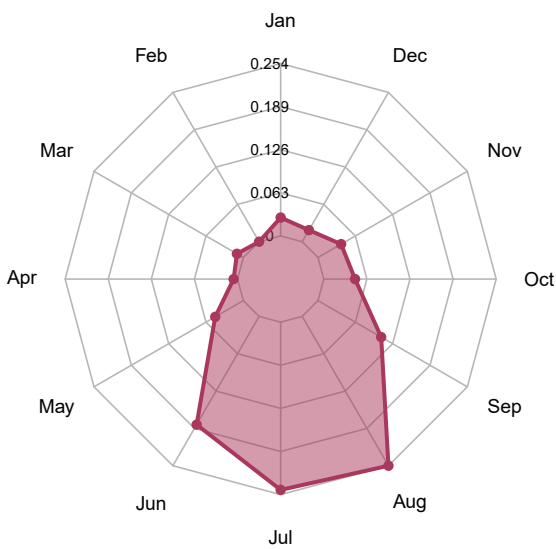

**Myiasis**

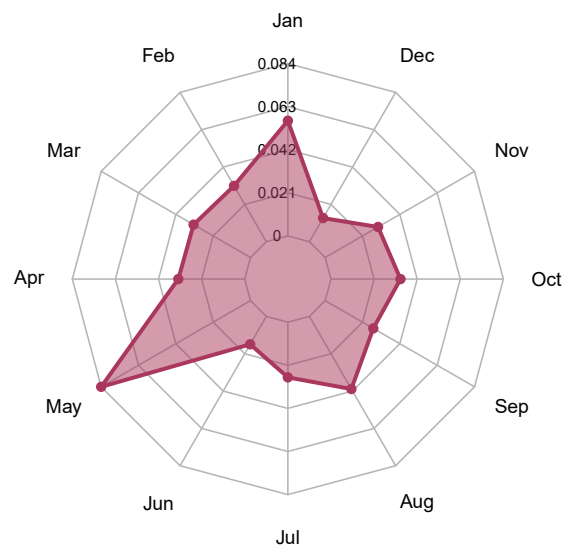



**Tetanus**

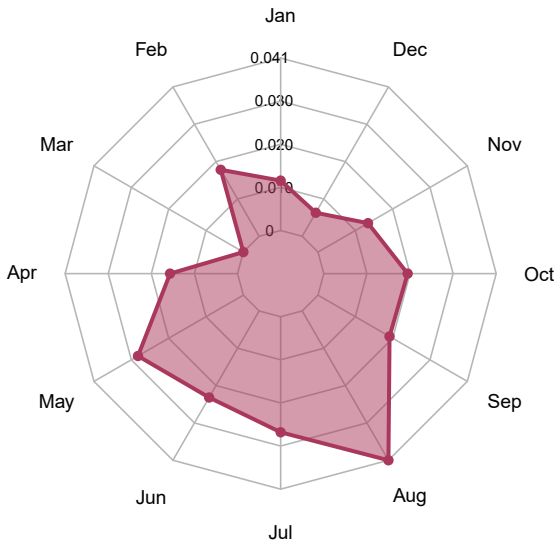

**Rabies**

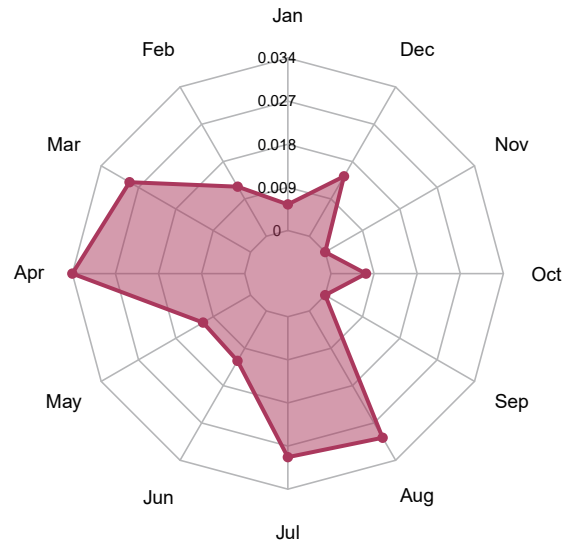

**Yaws**

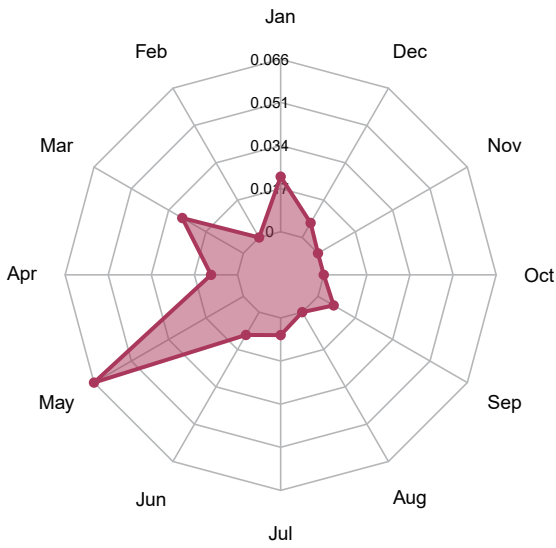

**Acute hemorrhagic conjunctivitis**

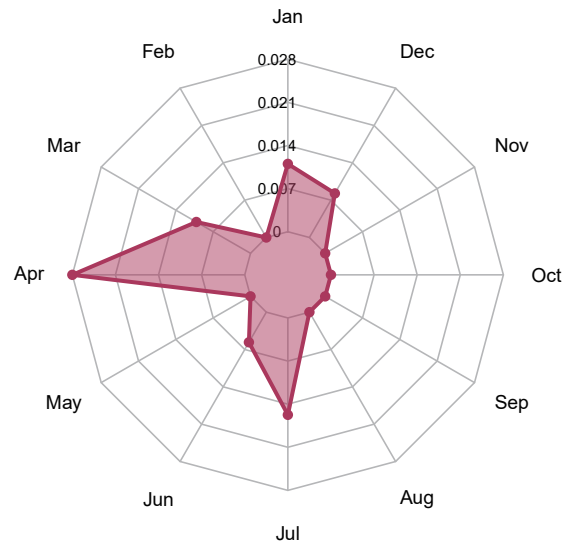

**Eumycetoma**

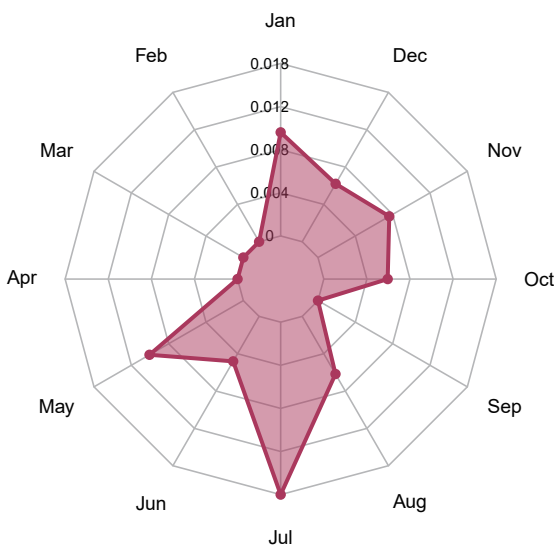

**Infestation by mites**

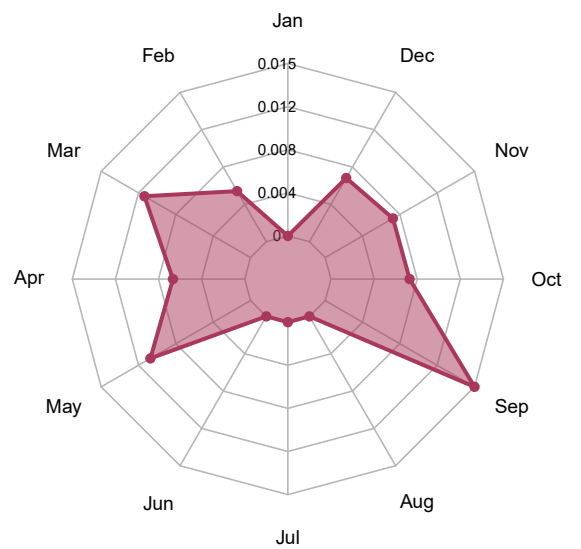

**Infantile papular acrodermatitis**

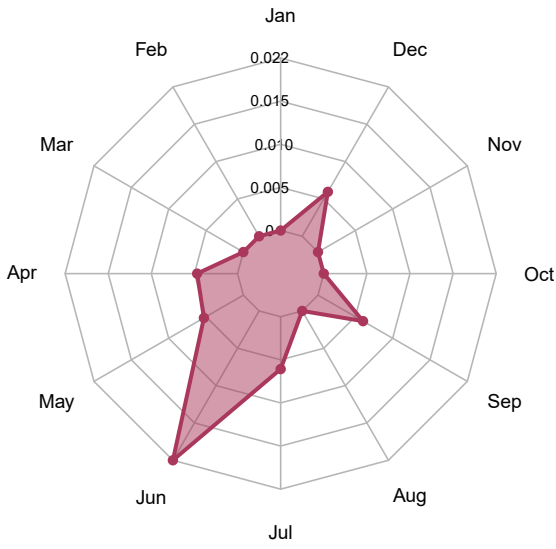

**Echinococcosis**

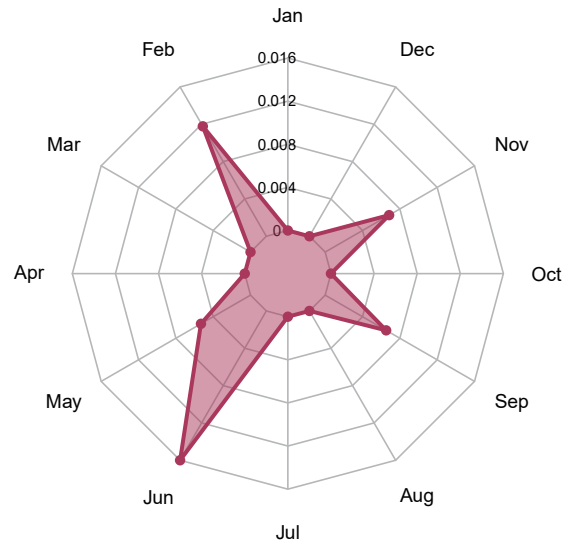

**Sporotrichosis**

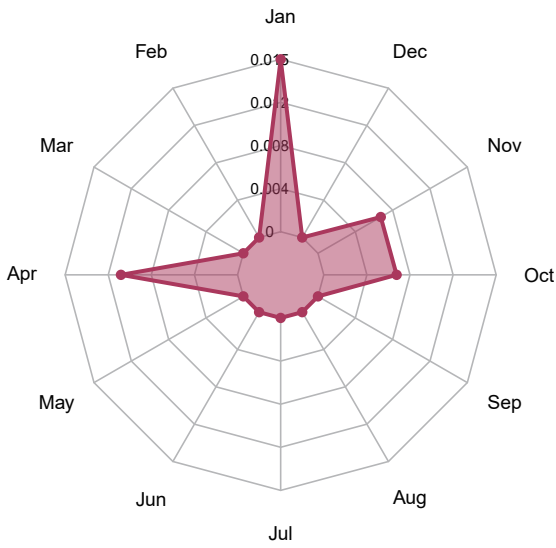

**Strongyloidiasis**

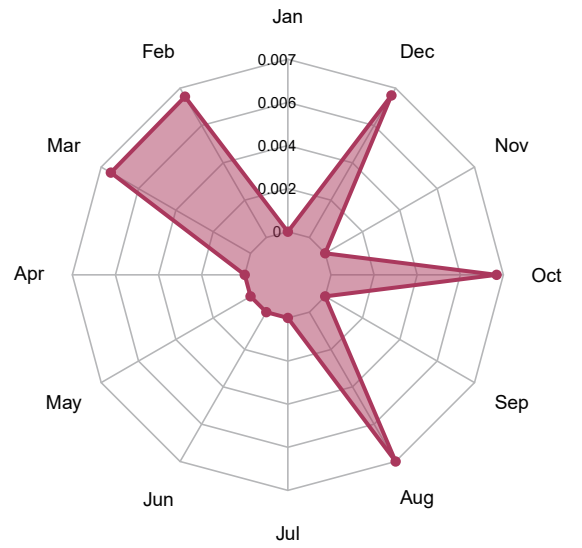

**Obstetrical tetanus**

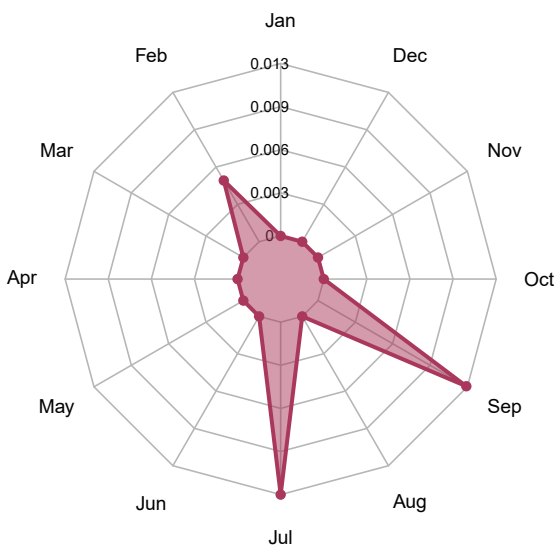

**Hookworm diseases**

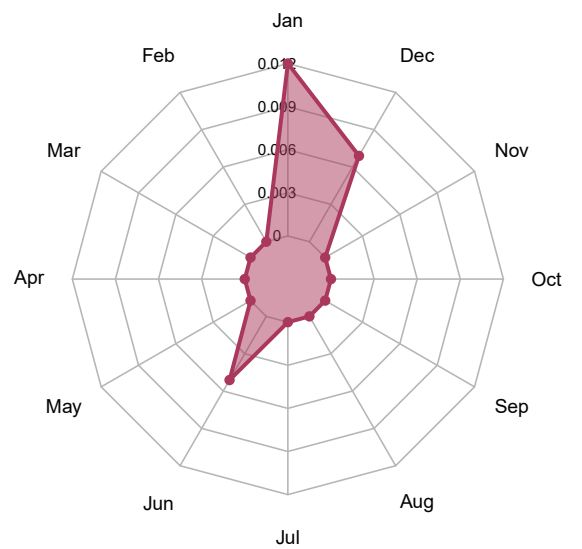

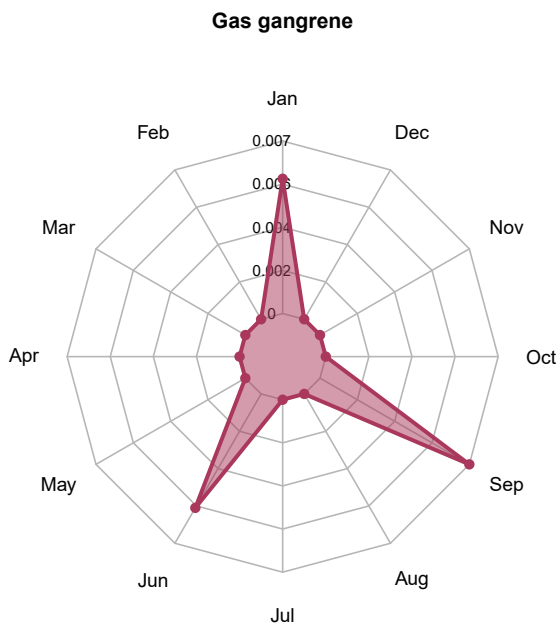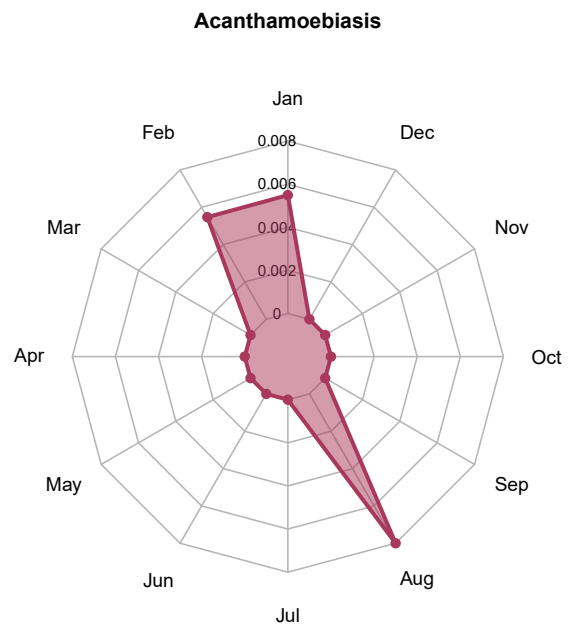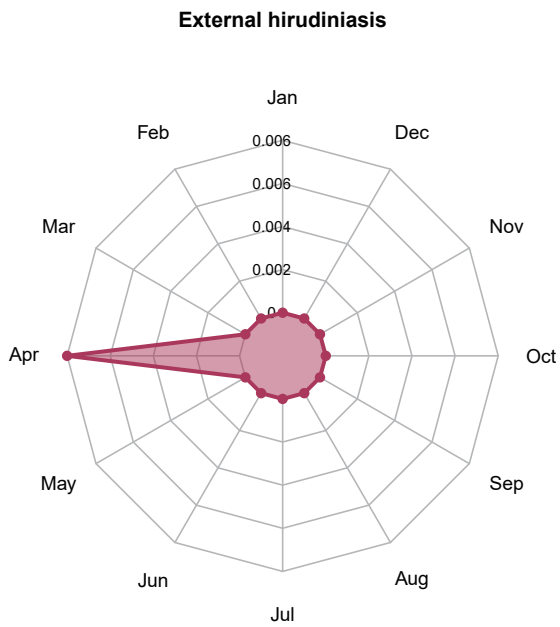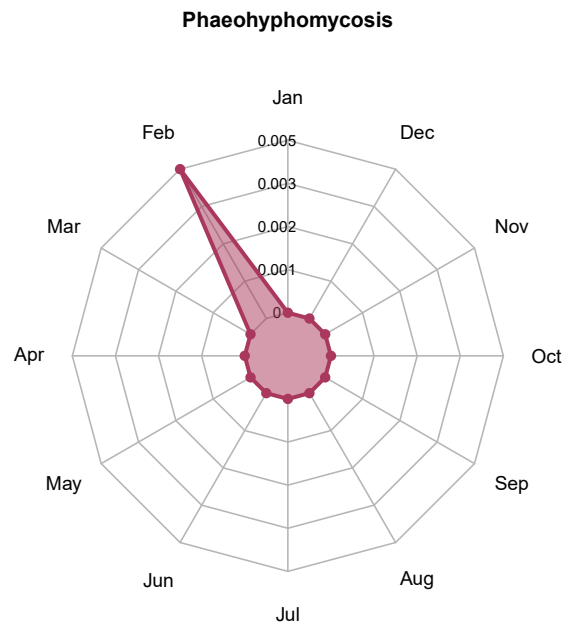

**Figure S4: Seasonal distribution of 130 infectious diseases in Shandong province, China, 2013-2017**  
 HIV=human immunodeficiency virus, PIPSM=picornavirus infections presenting in the skin or mucous membranes.

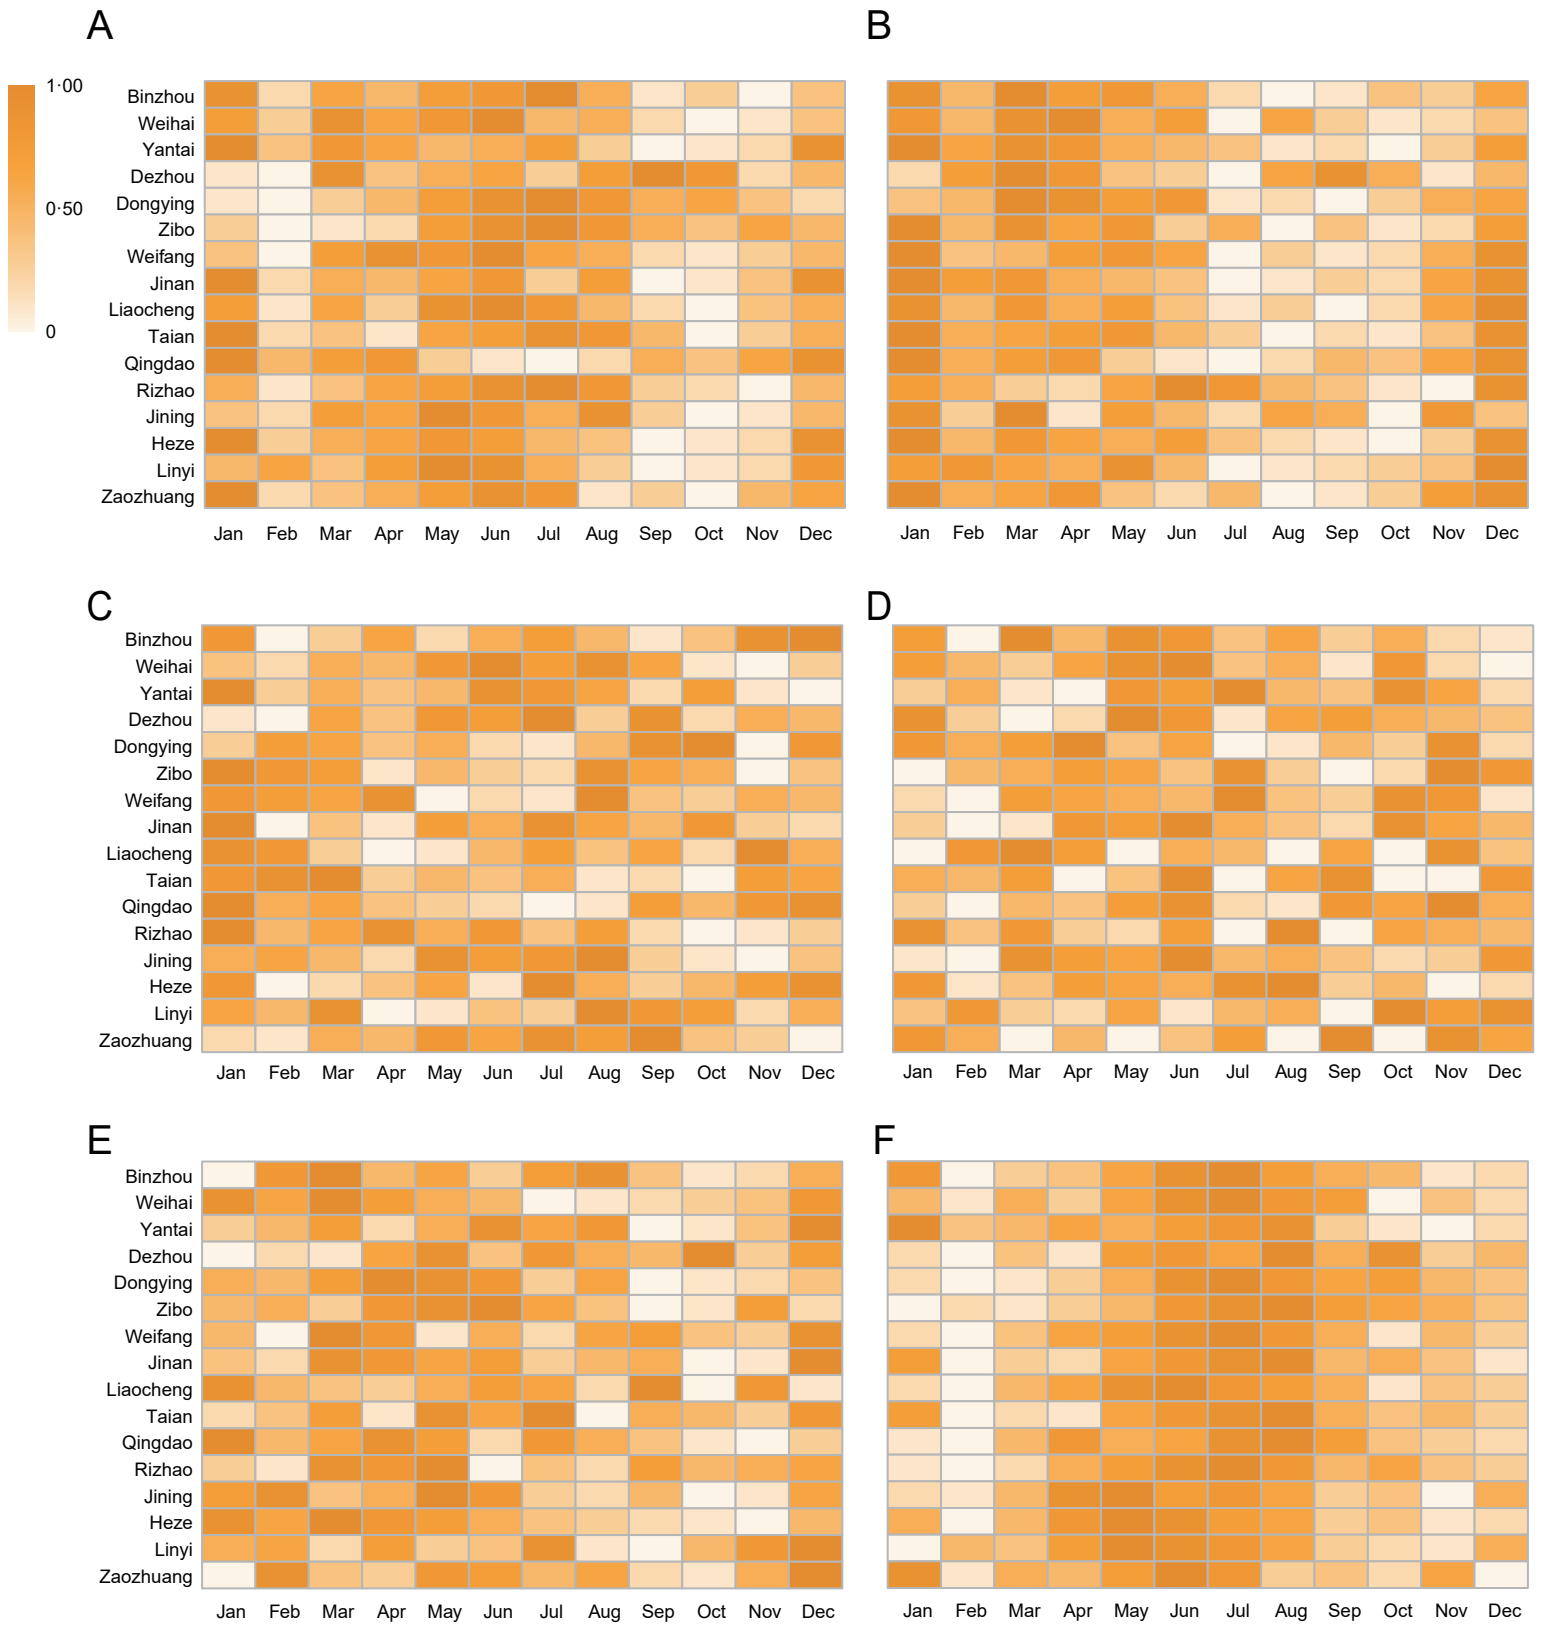

**Figure S5: Seasonal distribution of the five categories of infectious diseases in 16 prefecture-level cities of Shandong province, China**  
**(A) Total infections. (B) Respiratory infections. (C) Gastrointestinal infections. (D) Vector-borne infections. (E) Blood- and sexually transmitted infections. (F) Mucocutaneous infections.**

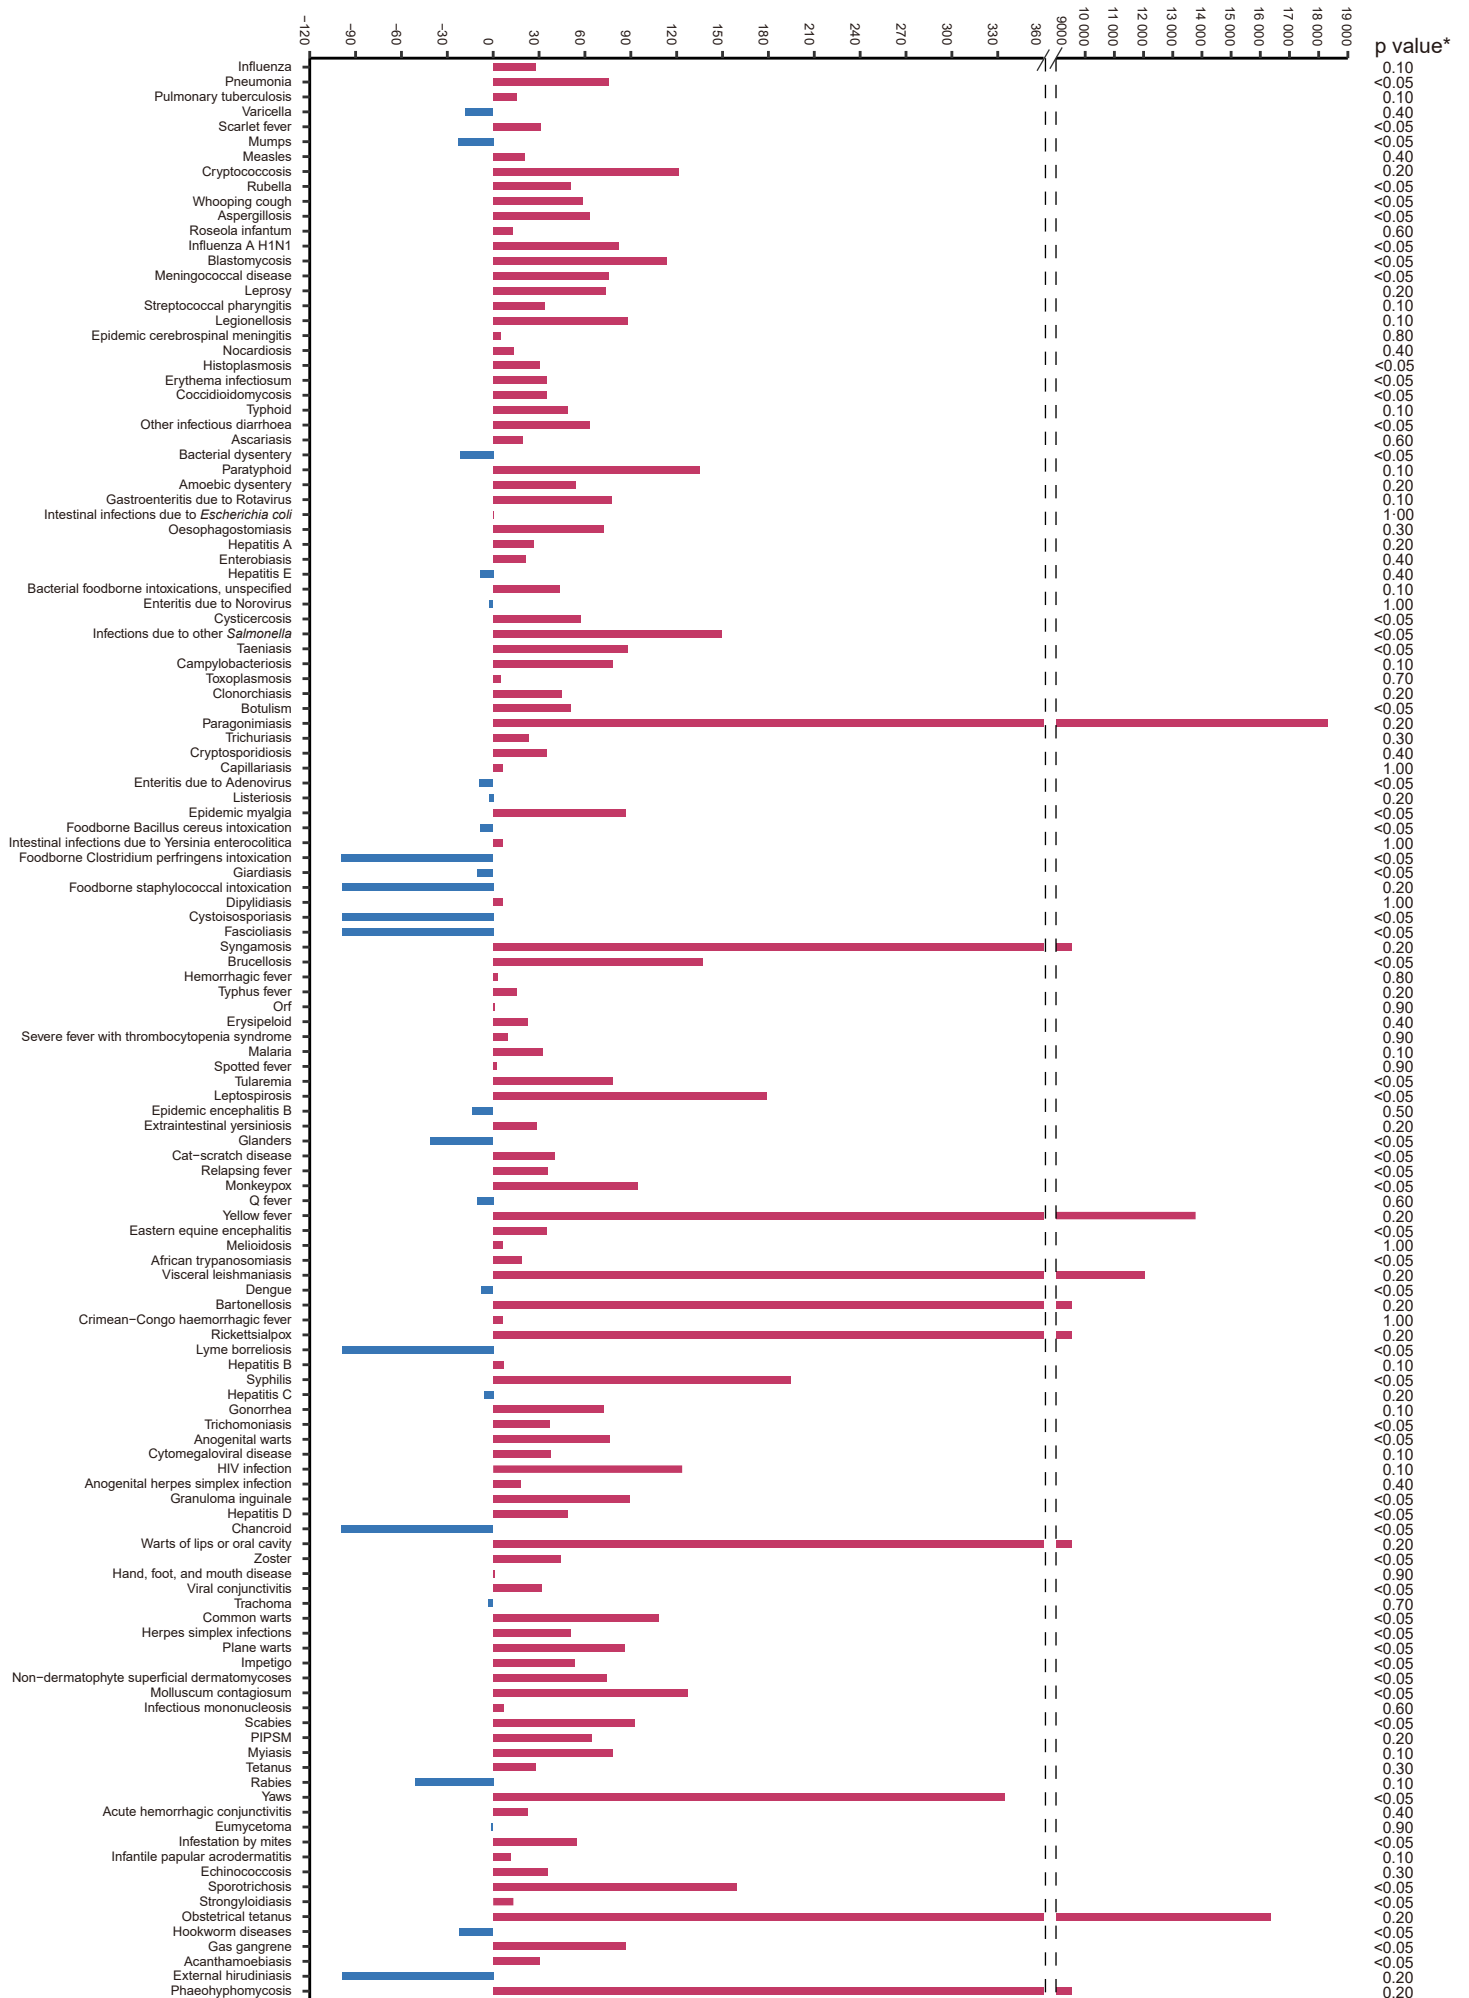

**Figure S6: Annual percentage change in the incidence density of 130 infectious diseases.**

HIV=human immunodeficiency virus, PIPSM=Picornavirus infections presenting in the skin or mucous membranes.

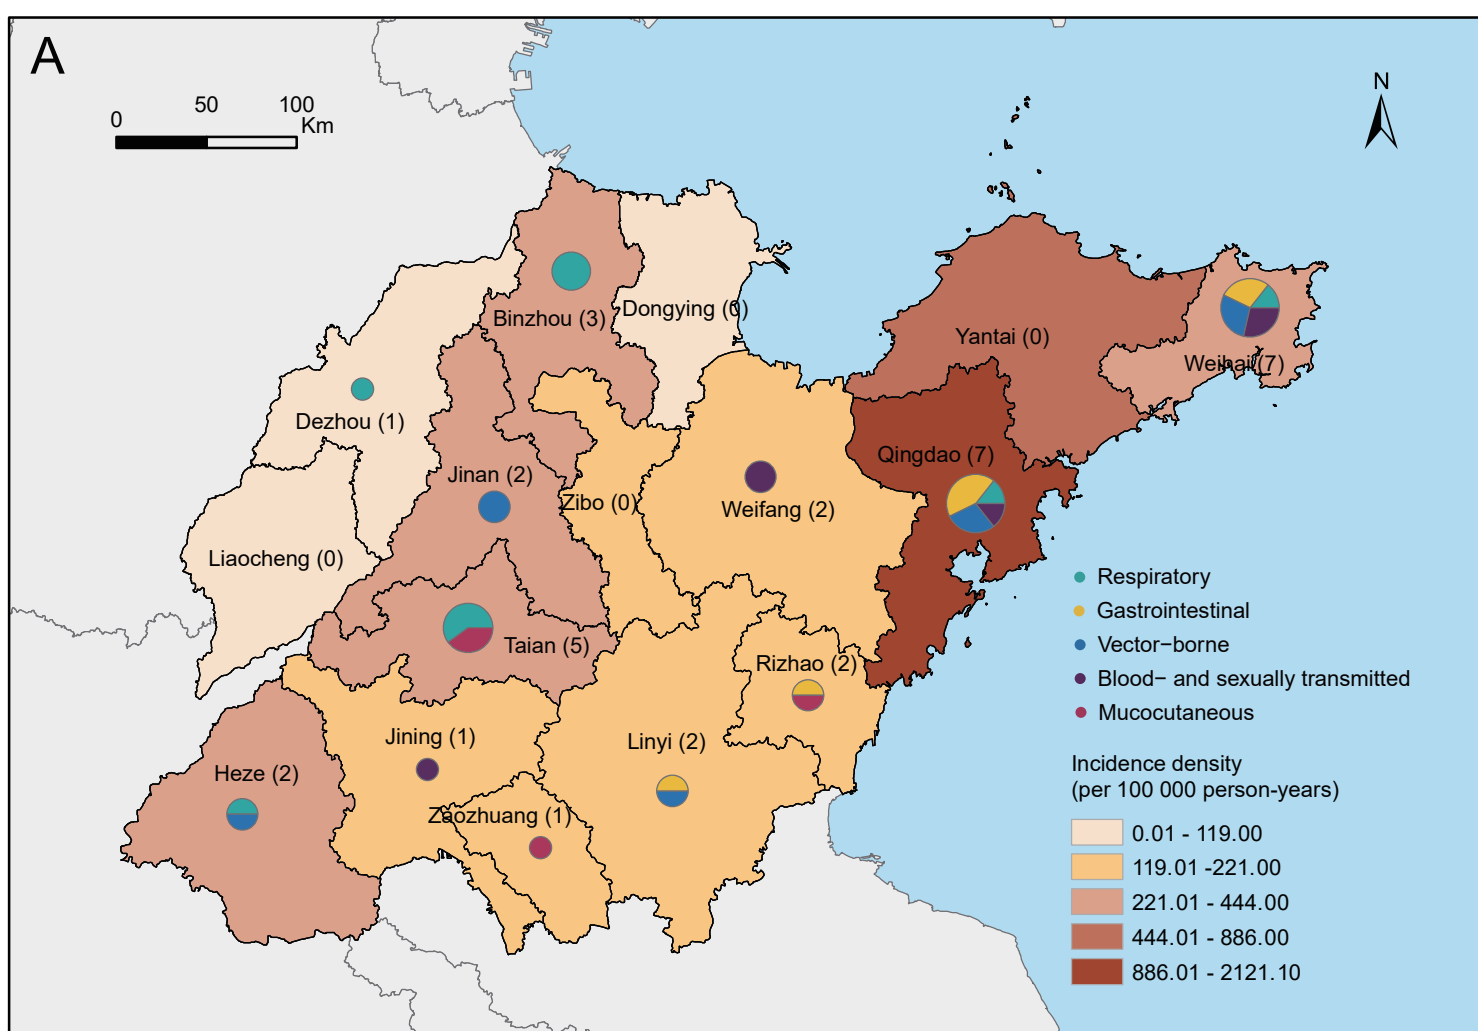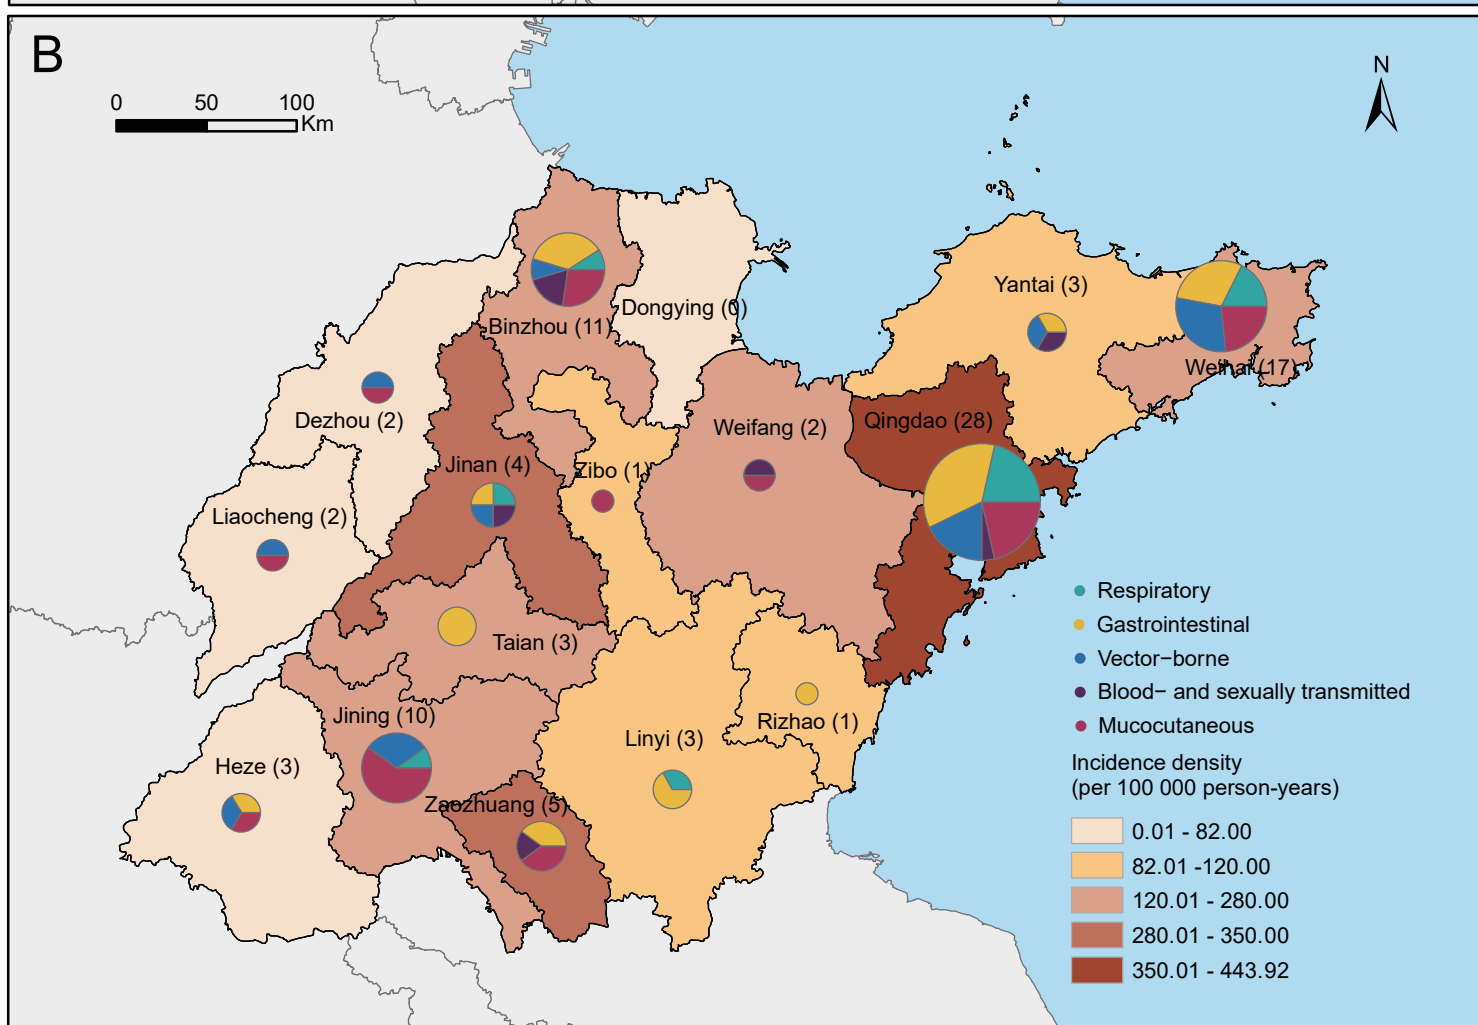

**Figure S7: Geographical distribution of 35 notifiable infectious diseases and 95 non-notifiable infectious diseases in Shandong province, China**

(A) Notifiable infectious disease, and (B) non-notifiable infectious disease. The circle represents cities where the infectious diseases with the highest incidence density distributed, with the circle size and numbers in parentheses indicating the disease number.
